# Supplementary material for: Preventive Antenatal Educational Program on Allergic Diseases (PAEPAD) versus standard antenatal care for prevention of atopic dermatitis: study protocol for a single-centre, investigator-blinded randomised controlled trial
Source: PubMed Central journal article supplement — BMJ Open. 2022 Jan 25;12(1):e048083. doi: 10.1136/bmjopen-2020-048083 (PMC8796218; doi:10.1136/bmjopen-2020-048083), 2022-01-25
Supplement: bmjopen-2020-048083.draft_revisions.pdf [file bmjopen-2020-048083.draft_revisions.pdf]

# BMJ Open

BMJ Open is committed to open peer review. As part of this commitment we make the peer review history of every article we publish publicly available.

When an article is published we post the peer reviewers' comments and the authors' responses online. We also post the versions of the paper that were used during peer review. These are the versions that the peer review comments apply to.

The versions of the paper that follow are the versions that were submitted during the peer review process. They are not the versions of record or the final published versions. They should not be cited or distributed as the published version of this manuscript.

BMJ Open is an open access journal and the full, final, typeset and author-corrected version of record of the manuscript is available on our site with no access controls, subscription charges or pay-per-view fees (<http://bmjopen.bmj.com>).

If you have any questions on BMJ Open's open peer review process please email [info.bmjopen@bmj.com](mailto:info.bmjopen@bmj.com)

# BMJ Open

## Preventive Antenatal Educational Program on Allergic Diseases (PAEPAD) versus standard antenatal care for prevention of atopic dermatitis: study protocol for a single-center, investigator blinded randomized controlled trial.

|                                 |                                                                                                                                                                                                                                                                                                                                                                                                                                                                                                                                                                                                                                                                                                                                                                                                                                                                                                                                                                                                                                                                                                             |
|---------------------------------|-------------------------------------------------------------------------------------------------------------------------------------------------------------------------------------------------------------------------------------------------------------------------------------------------------------------------------------------------------------------------------------------------------------------------------------------------------------------------------------------------------------------------------------------------------------------------------------------------------------------------------------------------------------------------------------------------------------------------------------------------------------------------------------------------------------------------------------------------------------------------------------------------------------------------------------------------------------------------------------------------------------------------------------------------------------------------------------------------------------|
| Journal:                        | <i>BMJ Open</i>                                                                                                                                                                                                                                                                                                                                                                                                                                                                                                                                                                                                                                                                                                                                                                                                                                                                                                                                                                                                                                                                                             |
| Manuscript ID                   | bmjopen-2020-048083                                                                                                                                                                                                                                                                                                                                                                                                                                                                                                                                                                                                                                                                                                                                                                                                                                                                                                                                                                                                                                                                                         |
| Article Type:                   | Protocol                                                                                                                                                                                                                                                                                                                                                                                                                                                                                                                                                                                                                                                                                                                                                                                                                                                                                                                                                                                                                                                                                                    |
| Date Submitted by the Author:   | 22-Feb-2021                                                                                                                                                                                                                                                                                                                                                                                                                                                                                                                                                                                                                                                                                                                                                                                                                                                                                                                                                                                                                                                                                                 |
| Complete List of Authors:       | zhao, mutong; Beijing Children's Hospital Capital Medical University, Dermatology<br>Liang, Yuan; Beijing Children's Hospital Capital Medical University, Dermatology<br>Song, Fengli; Capital Medical University Daxing Teaching Hospital<br>Ma, Lili; Capital Medical University Daxing Teaching Hospital<br>Wang, Ying; Capital Medical University Daxing Teaching Hospital<br>Gao, Wanli; Capital Medical University Daxing Teaching Hospital<br>Tian, Jing; Beijing Children's Hospital Capital Medical University, Dermatology<br>Ying, Xiangji; Peking University Cancer Hospital<br>Shen, Chunping; Beijing Children's Hospital Capital Medical University<br>Wang, Shan; Beijing Children's Hospital Capital Medical University<br>Jiao, Lei; Beijing Children's Hospital Capital Medical University<br>Wang, Yang; Beijing Children's Hospital Capital Medical University<br>Sun, Xiaoyan; Capital Medical University Daxing Teaching Hospital<br>Ma, Lin; Beijing Children's Hospital Capital Medical University, Dermatology<br>Ma, Xiuhua; Capital Medical University Daxing Teaching Hospital |
| <b>Primary Subject Heading</b>: |                                                                                                                                                                                                                                                                                                                                                                                                                                                                                                                                                                                                                                                                                                                                                                                                                                                                                                                                                                                                                                                                                                             |
| Secondary Subject Heading:      |                                                                                                                                                                                                                                                                                                                                                                                                                                                                                                                                                                                                                                                                                                                                                                                                                                                                                                                                                                                                                                                                                                             |
| Keywords:                       | Eczema < DERMATOLOGY, EPIDEMIOLOGY, PAEDIATRICS, Paediatric dermatology < PAEDIATRICS                                                                                                                                                                                                                                                                                                                                                                                                                                                                                                                                                                                                                                                                                                                                                                                                                                                                                                                                                                                                                       |
|                                 |                                                                                                                                                                                                                                                                                                                                                                                                                                                                                                                                                                                                                                                                                                                                                                                                                                                                                                                                                                                                                                                                                                             |

SCHOLARONE™  
Manuscripts

1  
2  
3 1 **TITLE PAGE**

4 2 **Preventive Antenatal Educational Program on Allergic Diseases (PAEPAD) versus**  
5 3 **standard antenatal care for prevention of atopic dermatitis: study protocol for a**  
6 4 **single-center, investigator-blinded randomized controlled trial.**

7 5 Mutong Zhao<sup>1</sup>, Yuan Liang<sup>1</sup>, Fengli Song<sup>2</sup>, Lili Ma<sup>2</sup>, Ying Wang<sup>2</sup>, Wanli Gao<sup>2</sup>, Jing  
8 6 Tian<sup>1</sup>, Xiangji Ying<sup>3</sup>, Chungping Shen<sup>1</sup>, Shan Wang<sup>1</sup>, Lei Jiao<sup>1</sup>, Yang Wang<sup>1</sup>, Xiaoyan  
9 7 Sun<sup>4</sup>, Lin Ma<sup>1</sup>, Xiuhua Ma<sup>2</sup>

10 8 1 Department of Dermatology, Beijing Children's Hospital, Capital Medical University,  
11 9 National Center for Children's Health, Beijing, China, 100045.

12 10 2 Department of Obstetrics and Gynecology, Beijing Daxing District People's Hospital-  
13 11 Capital Medical University Daxing Teaching Hospital, Beijing, China, 102600.

14 12 3 Gastrointestinal Cancer Center, Key Laboratory of Carcinogenesis and Translational  
15 13 Research (Ministry of Education), Peking University Cancer Hospital and Institute, Hai-  
16 14 Dian District, Beijing, China, 100142

17 15 4 Department of Dermatology and Venerology, Beijing Daxing District People's  
18 16 Hospital-Capital Medical University Daxing Teaching Hospital, Beijing, China, 102600.

19 17 Correspondence to:

20 18 Lin Ma, MD, Department of Dermatology, Beijing Children's Hospital, Capital Medical  
21 19 University, National Center for Children's Health, Beijing, China. E-mail:

22 20 bch\_maleen@aliyun.com. Tel: +86 13601305676

23 21 Xiuhua Ma, MD, Department of Obstetrics and Gynecology, Beijing Daxing District  
24 22 People's Hospital, Capital Medical University Daxing Teaching Hospital, Beijing, China.

25 23 E-mail: mxhdxqyy@126.com Tel: +86 13381021859

26 24 Word count: 4407

## 25 **ABSTRACT**

### 26 **Introduction**

27 Patient education serves an essential purpose in the long-term management of allergic  
28 diseases as a secondary prevention approach. However, evidence on using education for  
29 primary prevention is limited. This study aims to evaluate the effect of an educational  
30 intervention, i.e., the Preventive Antenatal Education Program on Allergic Diseases  
31 (PAEPAD), on infantile allergic disease incidences.

### 32 **Methods and analysis**

33 This is a single-center randomized controlled trial of expecting mother-children dyads in  
34 Daxing Teaching hospital of Beijing, China. A total of 2266 expecting mothers will be  
35 recruited. Expecting mothers enlisted in the birth registry of Daxing Teaching Hospital of  
36 Capital Medical University and intend to give birth at this location will be screened for  
37 eligibility. Women at high risk for miscarriage or intend to have abortions will be  
38 excluded. The participants will be allocated into two groups (i.e., the PAEPAD and the  
39 standard care group) by random allocation (1:1). The PAEPAD group will receive a  
40 multi-disciplinary education of neonatal care, whereas the standard care group will  
41 receive the standard neonatal care education carried out by obstetricians. They will be  
42 followed for two years. The primary outcome will be infantile atopic dermatitis (AD)  
43 [cumulative incidence](#) at two years post-partum. Secondary outcomes will include other  
44 AD outcomes, atopic march outcomes, knowledge outcomes, and other maternal and  
45 neonatal outcomes. Data collection will be carried out using both electronic and paper  
46 questionnaires. Biological samples will also be collected longitudinally.

### 47 **Ethics and dissemination**

48 The study design was approved by the ethical committee of Capital Medical University  
49 Daxing Teaching Hospital, Beijing, China. The trial results will be published in peer-  
50 reviewed journals and at conferences.

### 51 **Trial registration**

52 The trial is prospectively registered at the ChiCTR registry (Trial ID:  
53 ChiCTR2000040463).

### 54 **Strengths and limitations of the study**

55 Large single-center investigator-blinded randomized controlled trial (RCT).

1  
2  
3 56 First attempt to investigate education for primary prevention of incident cases of allergic  
4 57 diseases (atopic dermatitis for primary outcome).

5 58 Prone to potential contamination due to single-center design and non-medication  
6 59 intervention.

7 60 Potential heterogeneity of intervention effect due to variation in how the intervention will  
8 61 be carried out by individual educator albeit provision of formal training for educators.

## 62 **KEYWORDS**

63 Primary prevention, atopic dermatitis, atopic march, health education, antenatal  
64 education, pediatric, study protocol

## 65 **INTRODUCTION**

66 Atopic disorders place a substantial burden on both individuals and the health care  
67 system<sup>1-4</sup>. The sequential occurrence of AD, followed by one or more disorders  
68 characterized by allergen-specific type 2 (including TH2) responses are designated as  
69 atopic march<sup>5</sup>. The underlying mechanisms feature both a genetic susceptibility in which  
70 barrier dysfunction and immune dysregulation predispose atopic individuals to Th2  
71 immunity, and a progression in which AD and its pathological changes function as  
72 instigating events to subsequent development of other atopic comorbidities<sup>5 6</sup>. The human  
73 skin is a functional immune organ with an abundance of immunocompetent cells. In the  
74 resting state, an intact skin barrier and a balance of immune cell populations, cytokines,  
75 and chemokines promote immune tolerance, which is otherwise disrupted in AD patients.  
76 Barrier dysfunction from both loss-of-function mutations in filaggrin and the itch-scratch  
77 cycle was postulated as the driving component for atopic march programming by  
78 promoting Th2 and Th17 differentiation<sup>7-9</sup>. Subsequently, sensitizations to food allergens  
79 develop in the setting of Th2 skewing, which is otherwise Th1 skewed in the  
80 gastrointestinal-homing T cells in tolerant subjects<sup>10</sup>. Similarly, in asthmatic airways,  
81 disrupted junctional adhesion, mucus plugging develops due to Th2 polarization. While  
82 the severity of subsequent allergic airway inflammation was affected by AD, abrogation  
83 of AD by topical treatment prevents worsening of subsequent airway inflammation by  
84 counteracting the Th17 pathway<sup>11</sup>. Granted that both the genetic predisposition and the  
85 atopic progression contribute to the development of atopic march, longitudinal studies are  
86 warranted to explore the impact of immune activation of AD on the development of other

1  
2  
3 87 TH2 comorbidities. Meanwhile, the role of epithelial-immune crosstalk in the atopic  
4  
5 88 march needs to be further elucidated.  
6  
7 89 To date, extensive research has been conducted on the therapeutic effect of barrier  
8  
9 90 enhancement using emollients. Compelling evidence indicated that emollients render the  
10  
11 91 skin less susceptible to irritants and reduce flares of AD (secondary prevention)<sup>12</sup> and  
12  
13 92 therefore was regarded as a cornerstone of AD therapy<sup>13</sup>. However, evidence was  
14  
15 93 inconsistent regarding the preventive effect of emollient application<sup>12 14-17</sup>. The  
16  
17 94 discordance from these behavioral intervention studies is probably a result of the  
18  
19 95 difference in when the outcome assessment took place. In the BEEP<sup>12</sup> and  
20  
21 96 PreventADALL<sup>14</sup> studies, the outcome was measured after a long washout period to  
22  
23 97 ensure that any mild AD would not be concealed by the on-going application of  
24  
25 98 emollients, whereas in the small studies<sup>15 16</sup> the immediate effect was evaluated.  
26  
27 99 However, the null long-term result should not overshadow the strong efficacy signal  
28  
29 100 displayed at the immediate outcome assessments. Moreover, as behavior change is a  
30  
31 101 process that unfolds through a continuum of stages from pre-contemplation,  
32  
33 102 contemplation, preparation, to action and maintenance, such straightforward behavioral  
34  
35 103 intervention may not echo with the real-world scenario, where behavior changes are  
36  
37 104 achieved through health promotion initiatives, including health education and health  
38  
39 105 policies<sup>18 19</sup>. Consequently, the generalizability of these studies might be affected due to  
40  
41 106 the difference in how intervention was delivered and the setting under which outcome  
42  
43 107 assessment took place.  
44  
45 108 In realizing the tremendous burden inflicted by atopic disorders and the critical role of  
46  
47 109 AD in atopic march, significant therapeutic discoveries have been made over the past  
48  
49 110 century. Nonetheless, in AD and other chronic diseases alike, adherence to treatment can  
50  
51 111 be strikingly poor<sup>20</sup>. The underlying factors were postulated to be the complexity of  
52  
53 112 treatment regimen, corticosteroid phobia, and caregiver burden<sup>20</sup>. Addressing these  
54  
55 113 issues calls for consistent efforts in patient education that can hardly be accomplished in a  
56  
57 114 typical clinical visit. Recent studies have shown that structured patient education can  
58  
59 115 significantly reduce disease severity in AD patients<sup>21</sup>. Given this, guidelines for AD have  
60  
116 acknowledged education of patients and caregivers as an essential form of secondary  
117 prevention to reduce disease flares and improve quality of lives<sup>22</sup>. However, little is

1  
2  
3 118 known about how education performs as a primary prevention approach to reduce AD  
4  
5 119 disease burden.  
6  
7 120 Antenatal education is a crucial component of antenatal care. Since its implementation  
8  
9 121 from the nineteenth century, mortality in children has decreased tremendously. In 2005,  
10  
11 122 the World Health Organization called for “realizing the Potential of Antenatal Care”<sup>23</sup>,  
12  
13 123 and thence started using it as a platform for primary prevention of malnutrition,  
14  
15 124 HIV/AIDS, sexually transmitted infections, tuberculosis, and prevention of postpartum  
16  
17 125 and neonatal diseases<sup>24-26</sup>. Its diversified usage has led to us hypothesize that educational  
18  
19 126 intervention delivered through the antenatal education platform may yield informative  
20  
21 127 data for assessing the primary prevention of allergic diseases. Thus, the Preventive  
22  
23 128 Antenatal Education Program on Allergic Diseases (PAEPAD) study focuses on using  
24  
25 129 the antenatal care platform as a more affordable and effective health education approach.  
26  
27 130 In this investigator-blinded, randomized controlled trial, we aim to evaluate the effect of  
28  
29 131 such intervention vs. standard education on atopic disease outcomes. The primary  
30  
31 132 objective is to evaluate the preventive effect of PAEPAD on atopic dermatitis and atopic  
32  
33 133 comorbidity incidences. The secondary objectives are: 1) to explore the immune-barrier  
34  
35 134 crosstalk between the immune system, commensal flora and skin barrier function that  
36  
37 135 may explain the development of atopic march; 2) to identify biomarkers (metabolites,  
38  
39 136 MicroRNAs) that can be used to characterize individuals at high risk of AD and atopic  
40  
41 137 march; 3) to elucidate whether and to what extent the maternal immune milieu influences  
42  
43 138 AD development of the child through cord blood and breast milk.

## 139 **METHODS AND ANALYSIS**

### 140 **Study design**

141 The study is an exploratory prospective investigator-blinded randomized controlled trial  
142 with two arms (PAEPAD vs. standard antenatal education). All expectant mothers  
143 planning to give birth at the Daxing Teaching Hospital of Capital Medical University will  
144 be invited to participate. Daxing Teaching Hospital of Capital Medical University is a  
145 general hospital located in Daxing district of Beijing, China, with more than 6,000  
146 deliveries annually. Daxing district makes up approximately 6.3% of Beijing  
147 geographically. Daxing Teaching Hospital of Capital Medical University makes up

1  
2  
3 148 approximately 2.7% of Beijing's annual deliveries. This protocol was drafted (Aug 17<sup>th</sup>,  
4 149 2020) before participant recruitment (Oct 30<sup>th</sup>, 2020).

6 150 **RECRUITMENT, INCLUSION AND EXCLUSION CRITERIA**

8 151 All expectant parents living in the catchment area of the Daxing Teaching Hospital of  
9 152 Capital Medical University will receive an information leaflet about the study at their  
11 153 first visit to the maternity clinic. Recruitment will take place in their first mandatory  
13 154 maternity class between gestation week 7 to 14+6. All expectant mothers will be given  
15 155 detailed information about the study. A trained research nurse will outline key  
16 156 information (i.e., inclusion and exclusion criteria, scheduled research visits, and  
18 157 instructions on biological sample collection) about the study in the form of a short lecture  
20 158 session. The parents who wish to participate will be requested to provide written  
21 159 informed consent. They will be inquired on five levels of consent: 1) consent to  
23 160 participate in the study; 2) consent to biological sample collections of the mother that are  
24 161 non-invasive, including but not limited to the recollection of blood from routine  
26 162 pregnancy workups; 3) consent to biological sample collections of the mother that are  
27 163 minimally invasive or could potentially cause discomfort, i.e., additional blood draw and  
28 164 vaginal swabs; 4) consent to biological sample collections of the child that are non-  
30 165 invasive, including but not limited to the recollection of blood from routine checkups; 5)  
31 166 consent to biological sample collections of the child that are minimally invasive or could  
32 167 potentially cause discomfort, i.e., additional blood draw and tape stripping. At birth,  
33 168 another consent form on the children's biological sample collection will be signed to  
34 169 allow for any change of consent status on non-invasive and minimally invasive sample  
35 170 collections. Consented participants will subsequently receive a QR code through their  
36 171 cellphone after registration. By scanning the QR code, the recruitment staff will be able  
37 172 to confirm their participation status, at the end of which a study-specific ID number will  
38 173 be generated automatically.

40 174 **Inclusion and exclusion criteria**

41 175 Run-in phase inclusion criteria: 1. Enlisted in the birth registry of Daxing Teaching  
42 176 Hospital of Capital Medical University and intend to give birth at this location; 2.  
43 177 Women aged  $\geq 18$ ; 3. Less than 14+6 gestational week when recruited as measured by last



178 menstrual period; 4. Residents of Daxing and intend to remain residing in Daxing for at  
179 least two years postpartum; 5. Written consent form.

180 Randomization phase inclusion criteria:

181 Pregnant women enlisted in the birth registry of Daxing Teaching Hospital of Capital  
182 Medical University and intend to give birth at this location; passes the run-in phase  
183 criteria.

184 Withdrawal criteria: 1. Still birth; 2. Abortion (spontaneous or induced); 3. Rare  
185 comorbidities that present after inclusion into the study that may render the participant  
186 unsuitable for participation, including but not limited to malignancies, amniotic fluid  
187 embolism, eclampsia, and major birth abnormalities of the child.

188 Exclusion criteria: 1. Planned abortion; 2. Rare comorbidities of the mother that may  
189 cause miscarriage and congenital disabilities as determined by OBs, including but not  
190 limited to malignancies, congenital heart diseases, monogenetic diseases; 3. Recurrent  
191 miscarriage; 4. Mental, psychological or intellectual disabilities of either one of the  
192 expecting parents.

### 193 **Treatment allocation**

194 The study flow is as follows (Fig. 1): Participants will be randomly assigned to one of the  
195 two arms (i.e., PAEPAD vs. standard antenatal care). Individual randomization will be  
196 conducted by an epidemiologist using a computer-generated list with the number of  
197 groups being 2 and the distribution ratio of the two groups being 1:1. The list will be  
198 generated using block randomization with block sizes hidden from all investigators.  
199 Group allocation will be placed in sealed opaque envelopes, labeled by numbers only.  
200 The envelopes will be opened in consecutive order. Participants will then be informed  
201 about their allocated groups.

### 202 **Blinding**

203 This is a researcher-blinded study. Treatment allocation will be performed by an  
204 epidemiologist, and the researchers who evaluate the outcome matrices and analyze data  
205 will work independently from the group of clinicians who will carry out the intervention.  
206 Data entry will be undertaken by trial administrators blinded to group allocation.

## 207 **Intervention**

208 After randomization at GW 30, the participants will be informed on their allocation, and  
209 members of the research team will send out weekly invitations through E-mail to  
210 participants who have not yet completed the intervention. For those who failed to complete  
211 the intervention prior to admission into the OB department, a pre-recorded video will be  
212 played during their hospital stay. In the standard care group, patients will receive the  
213 standard neonatal care session from an experienced obstetrician, which will include  
214 breastfeeding, newborn screening tests, infant physiology, immunization, solid food  
215 introduction, belly and eye care (45 min). This session is one of the five mandatory sessions  
216 with participation of 83.7-91.9% over the past five years (unpublished data). The treatment  
217 group will receive an educational program designed by a multi-disciplinary group of  
218 experienced obstetricians and pediatric dermatologists. The program will be focused  
219 primarily on: 1) Standard education of neonatal care as the control group (45 min); 2) Skin  
220 care of the newborns with a practical demonstration on bathing and emollient application  
221 (20 min); 3) Sun protection (3 min); 4) A brief introduction on commonly used topical  
222 agents during infancy, including topical corticosteroids, antibiotics, and astringents (5 min);  
223 5) Besides, the program will also contain a 5 minutes presentation on atopic dermatitis  
224 disease burden, its precipitators, managements, disease courses, and the atopic march. At  
225 the neonatal care class, all participants will first receive the standard education, which will  
226 be held concurrently in two separate rooms to minimize group contamination. At the end  
227 of the sessions, participants of the PAEPAD cohort will be asked to participate in the  
228 PAEPAD session, which will last for less than 40 min. And participants of the standard  
229 neonatal care cohort will be asked to leave. Any crossover and non-compliance will be  
230 surveyed by a research nurse at the beginning and end of the antenatal sessions. The  
231 research nurses who collect data on compliance and who send out invitations will not be  
232 involved in outcome assessment.

## 233 **Study outcomes and follow-up**

### 234 Study outcomes

235 All outcome measures are summarized in Table 1. There will be both fixed and disease  
236 prompted postnatal follow-up time points during which outcome assessments will take  
237 place.

1  
2  
3 238 Diagnostic criteria for AD will be based on Hanifin&Rajka criteria, which is regarded as  
4  
5 239 the ‘gold standard’ for hospital-based research. The Infants’ Dermatitis Quality of Life  
6  
7 240 Index (IDQoL) is a questionnaire of ten items that has been translated into 21 languages.  
8  
9 241 This questionnaire is validated in infants aged 0–3 years<sup>27</sup>. Disease severity at disease  
10  
11 242 flares will be measured by SCORing of Atopic Dermatitis (SCORAD) and Eczema Area  
12  
13 243 and Severity Index (EASI) and through the course of the disease by Investigator’s Global  
14  
15 244 Assessment (IGA). SCORAD and EASI are validated instruments for disease severity  
16  
17 245 assessment<sup>28</sup>. IGA provides the most straightforward assessment of disease severity and  
18  
19 246 will thus be employed to assess AD disease-free days. An IGA of less than two is defined  
20  
21 247 as clearance of disease. An episode of expiratory wheezing will be defined as bronchial  
22  
23 248 obstruction lasting for at least 24 hours preceded by at least a one-week non-wheezing  
24  
25 249 healthy period, as defined by a physician. Recurrent wheezing will be defined as the  
26  
27 250 occurrence of 3 or more episodes of expiratory wheezing diagnosed by a physician in a  
28  
29 251 12-month period<sup>29</sup>. Rhinitis will be defined as symptoms of sneezing, a runny or blocked  
30  
31 252 nose, or itchy, red and watery eyes after exposure to furred pets or pollen the year before  
32  
33 253 follow-up and/or doctor’s diagnosis of allergic rhinitis<sup>30</sup>. Sensitization will be defined as  
34  
35 254 allergen-specific IgE  $\geq 0.35$  kU<sub>A</sub>/l. Parental knowledge and attitude will be quantified  
36  
37 255 using a questionnaire. The items of the questionnaire were developed following rigorous  
38  
39 256 procedures, including a review of literature, a patient focus group and a panel discussion  
40  
41 257 of experts. This questionnaire is currently under validation (unpublished data).  
42  
43 258 Follow-up  
44  
45 259 Participants will receive both fixed and disease prompted follow-up visits. Follow-up  
46  
47 260 visits will be carried out at Daxing hospital and five health service centers during  
48  
49 261 immunization. At follow-ups, biological samples, surveys and physical examination data  
50  
51 262 will be collected. Specific items are listed in Table. 2. In addition, children will be  
52  
53 263 assessed upon disease onsets and flares. During follow-ups, all cases will be treated  
54  
55 264 according to the guidelines<sup>2 13 31-34</sup> by specialists who are actively engaged in the care of  
56  
57 265 pediatric AD patients. Participants are not allowed to participate in other clinical trials  
58  
59 266 after inclusion into the study till the end of the last follow-up visit  
60

## 267 **Covariates**

268 Relevant covariates will include age, sex, social-economic status, familial history of  
269 allergic diseases, administration of systemic medication and nutrient supplements,  
270 maternal psychological status measured with Kessler-10 prenatally. Other variables,  
271 including the Edinburgh postnatal depression scale (EPDS), maternal comorbidities  
272 during pregnancy, postnatal nutrition status and indicators for feeding practices (i.e.,  
273 minimum dietary diversity, the introduction of solid, semi-solid or soft foods, duration of  
274 breastfeeding) will also be collected.

## 275 **Data collection and management**

276 Data collection at fixed time points will be conducted with an electronic database  
277 designed specifically for this project. At each visit, patients will be asked to present a  
278 patient-specific QR code, by scanning which two different questionnaires will be  
279 delivered to the participants and a research nurse separately. Less than 15 items will be  
280 surveyed in a standard questionnaire for the patient to minimize respondent fatigue  
281 caused by lengthy questionnaires. The rest of the relevant data will be collected by the  
282 research nurses during a face-to-face interview. Routine lab workups will be collected  
283 from the participants' medical records. Data will be checked by the members of the  
284 research team, and incorrect or missing questions will be sent back to the participants. All  
285 data recorded in this electronic database will be accessible only by the team members.  
286 Participants will receive text reminders prior to each follow-up visit and will be  
287 interviewed through phone calls for incomplete visits. Data collection at disease onsets  
288 and flares will be carried out with paper surveys, which will be encrypted and kept  
289 accessible only by team members with authorization. Group allocation data are accessible  
290 through unique identifiers on a separate sheet by only the principal investigators. All data  
291 handling (data entry, storage, and analysis) will be confidential. The principal  
292 investigators are responsible for ensuring data quality.

## 293 **Biological sample collection**

294 At each time point, biological samples from mothers and children (where applies) will be  
295 collected and stored (Table 2). These samples include maternal blood, urine, feces, skin,  
296 vaginal and oral swabs, breast milk, placenta, cord blood, meconium, and blood, feces,

297 skin, nasopharyngeal and external auditory canal swabs, tape stripping of skin lipids from  
298 the children. Procedures are detailed in the supplementary material.

### 299 **Sample size**

300 The PAEPAD study will be based on a sample of 2266 expecting mothers. We calculated  
301 that assuming 20%<sup>35</sup> AD rate, 20% lost to follow up (LTFU), with a clinically significant  
302 estimate of a cumulative incidence ratio of 0.75, 80% power and **two-sided** 5%  
303 significance level, the estimated sample size of the primary outcome would be 2266. The  
304 cutoff value of clinical significance of such educational intervention was derived by a  
305 survey of expert opinion (n=7, unpublished data) and from previous RCTs with  
306 behavioral interventions<sup>15 17</sup>.

### 307 **Analyses**

#### 308 Definition of population sets

- 309 1) Primary analysis population: The Modified Intent-to-treat Population (MITTP),  
310 which will comprise of expectant women who undergo randomization, with data of at  
311 least one post-intervention follow-up.
- 312 2) Per-protocol Population (PPP): All expectant women complying with the study  
313 protocol, with data of at least one post-intervention follow-up.
- 314 3) As treated population: All randomized participants who received the intervention  
315 (whether complied or not) , with data of at least one post-intervention follow-up.

#### 316 Statistical analysis

317 Statistical analyses will be performed using STATA 14.0, R 1.0.44 and SAS9.2 statistical  
318 software.

319 The primary analysis will be based on the MITT population. Sensitivity analyses will be  
320 done with both the PP population and the as-treated population. For primary analyses, we  
321 will use  $\chi^2$  tests to compare categorical outcomes and present risk ratios and risk  
322 differences with 95% confidence intervals. For continuous variables, normally distributed  
323 continuous variables will be compared using the t-test, and the Wilcoxon rank-sum test  
324 will be used for skewed variables. For time to event data, e.g., time to first AD episode  
325 and time to the first topical corticosteroid exposure, will be calculated using the Kaplan-  
326 Meier method. The HRs comparing PAEPAD and standard care will be estimated using  
327 cox regression model. Multiple imputation will be conducted if loss to follow-up exceeds

1  
2  
3 328 30%. Subgroup analysis will be done for the relative risk of AD, asthma, rhinitis and food  
4 329 sensitization stratified by familial history of atopic disorders, and AD severity for allergic  
5 330 comorbidities (whenever applies). Regression models with interaction terms will be used  
6  
7 331 to test for statistical significance among subgroups.

8  
9 332 For sensitivity analysis that shall be done with the PP population, the analyses above will  
10 333 be conducted. For the sensitivity analysis that shall be done with the secondary analysis  
11 334 population, both traditional multivariate comparison and propensity score matching will  
12 335 be used to better balance the covariates and identify comparable groups. An additional  
13 336 sensitivity analysis will be conducted on the population that receives in-person education  
14 337 (as opposed to video recorded).

### 20 338 **Data monitoring**

21 339 An epidemiologist who is independent of the research team will be tasked to monitor the  
22 340 data. An interim analysis will be performed when 50% of the patients complete the one-  
23 341 year follow-up. The epidemiologist will conclude based on the interim analysis if the  
24 342 intervention is proved to be different from the control (standard management) and report  
25 343 to the Principal Investigator (PI). The PI can then decide whether or not to modify  
26 344 recruitment.

### 32 345 **Patient and public involvement**

33 346 No patient was involved with study design, recruitment or conduct.

### 34 347 **Ethics and dissemination**

35 348 The PAEPAD study is approved by the ethics committee of Capital Medical University  
36 349 Daxing Teaching Hospital. Written informed consent will be obtained from all  
37 350 participants. This study is registered at the Chinese Clinical Trial Registry under the  
38 351 identifier ChiCTR2000040463. Participation in the project is voluntary and will not  
39 352 impact the medical care of the women regardless of their participation status throughout  
40 353 pregnancy. All participants have the right to withdraw from the study at any point and  
41 354 have their data removed from the study database. All patient data will be securely stored  
42 355 and kept accessible by the research members only, with previous authorization from the  
43 356 PI. The results will be disseminated through peer-reviewed journals. Results will also be  
44 357 communicated at scientific conferences.

### 54 358 **DISCUSSION**

1  
2  
3 359 PAEPAD study is a large single-center randomized controlled trial of an antenatal  
4 educational intervention for prevention of atopic dermatitis and the atopic march.  
5 360  
6 361 Previous studies on educational interventions have been therapeutic, aiming at reducing  
7 symptoms and improving quality of life. Therapeutic patient education (secondary  
8 362 prevention) in AD has been proved to be effective with a significant reduction in disease  
9 severity<sup>21</sup>. However, little is known about the primary preventive effect of educational  
10 363 and lifestyle interventions.  
11  
12 364 A strength of this study is the large sample size. In a similar study that aims to evaluate  
13 the effect of prenatal education on knowledge and behavioral changes for allergic disease  
14 prevention, the sample size was determined based on the behavioral matrices, resulting in  
15 365 a total sample size of 120<sup>36</sup>. As behavioral changes do not necessarily modify disease  
16 outcomes, a larger sample size is warranted to provide adequate power to detect disease  
17 366 outcome differences. Another strength is that we chose the topics of the PAEPAD  
18 sessions based on both experts' opinion and a previous survey (Supplementary material,  
19 367 table S1), which indicated that new mothers needed help on infant skin care, safe practice  
20 of sun protection and building an unbiased understanding on common topical drugs,  
21 especially corticosteroids. We did not discuss about the treatment of atopic diseases  
22 368 further than emphasizing the importance of following the instructions of physicians on a  
23 guideline-oriented<sup>2 13 31-34</sup> management at this lecture. Recent pilot studies provided  
24 strong efficacy signals for the hypothesis that daily emollient use could prevent atopic  
25 369 dermatitis<sup>15 17</sup>. While the subsequent large trials yielded null results<sup>12 14</sup>, it's crucial to  
26 realize that the hypotheses in these trials differ significantly. In the pilot studies,  
27 370 emollients were continued until the subsequent outcome assessment, whereas in the  
28 larger pragmatic trials, a washout period was implemented. In the Barrier Enhancement  
29 371 for Eczema Prevention (BEEP) study, the rates of continued emollient and wash product  
30 use extended beyond the intervention period until outcome assessment were as low as  
31 372 four and five percent for the intervention and the control group respectively<sup>12</sup>. Thus, the  
32 pilot studies assessed the immediate preventive effect, whereas the larger studies assessed  
33 373 whether this effect, if there is any, is sustainable. It's reasonable to hypothesize that the  
34 protective effect of emollients may not sustain beyond a year after refraining from  
35 374 application.  
36  
37  
38  
39  
40  
41  
42  
43  
44  
45  
46  
47  
48  
49  
50  
51  
52  
53  
54  
55  
56  
57  
58  
59  
60

1  
2  
3 390 The current study will explore the preventive effect of an educational intervention, which  
4 391 bears a closer resemblance to the real world scenario through which behavioral changes  
5 392 are achieved. In addition, we plan to longitudinally collect biological specimens to study  
6 393 the crosstalk of lifestyle changes and molecular biology.

7  
8  
9  
10 394 The study has some limitations. First, this study is subject to contamination due to the  
11 395 nature of a non-medication intervention and the single-center design. Consequently, the  
12 396 effect size to be detected will likely be a more conservative estimation of the real  
13 397 preventive effect. Therefore, we plan to collect cross-over data and conduct sensitivity  
14 398 analyses based on the PP population. Second, although the PAEPAD lectures will be led  
15 399 by experienced obstetricians and dermatologists, the heterogeneity may nonetheless  
16 400 constitute potential bias. We aim to reduce the heterogeneity by providing a training  
17 401 session and mock classrooms before the project launching during which lecturers will be  
18 402 evaluated on the organization of the class, clarity, student engagement and consistency of  
19 403 performance.

20  
21  
22  
23  
24  
25  
26  
27 404 In conclusion, the PAEPAD study will add to our knowledge of the preventive effect of  
28 405 antenatal education on allergic disease outcomes and identify cellular and molecular  
29 406 changes that will warrant future studies. We expect that results from the PAEPAD study  
30 407 will expand our understanding of the primary prevention of allergic disorders.

#### 31 408 **AUTHORS' CONTRIBUTIONS**

32  
33  
34  
35  
36 409 Lin Ma and Xiuhua Ma are the principal investigators of this trial and conceptualized the  
37 410 trial. Mutong Zhao, Yuan Liang, Jing Tian, Fengli Song, Ying Wang are responsible for  
38 411 the execution of the project. Mutong Zhao has written the first protocol manuscript. All  
39 412 authors critically reviewed the article. All the authors approved the final manuscript.

#### 40 413 **Authorship eligibility**

41  
42  
43  
44 414 Authorship of the consequent publication of this project will be granted to those who  
45 415 made a significant contribution to the conception, design, implementation, analysis of the  
46 416 data, or those who drafted the work or reviewed/revised it critically for important  
47 417 intellectual content.

#### 48 418 **Availability of data and materials**

49  
50  
51  
52  
53 419 The datasets to be analyzed will be available from the corresponding author upon  
54 420 reasonable request (requests should be directed to muz880@mail.harvard.edu).



1  
2  
3 421 **FUNDING**

4 422 This study has received a public grant from the Capital's Funds for Health Improvement  
5 and Research (CFH2020-2-7121). The funders had no role in the design of this study and  
6 423  
7 will not have any role during its execution, analyses, interpretation of data, or submission  
8 424  
9 of outcomes.  
10 425

11 426 **COMPETING INTERESTS**

12 427 None declared.  
13  
14  
15 428  
16  
17 429

18  
19 430 **References**

- 20 431  
21 432 1. Muraro A, Halken S, Arshad SH, et al. EAACI food allergy and anaphylaxis guidelines.  
22 433 Primary prevention of food allergy. *Allergy* 2014;69(5):590-601. doi:  
23 434 10.1111/all.12398  
24 435 2. Wollenberg A, Barbarot S, Bieber T, et al. Consensus-based European guidelines for  
25 436 treatment of atopic eczema (atopic dermatitis) in adults and children: part I.  
26 437 *Journal of the European Academy of Dermatology and Venereology : JEADV*  
27 438 2018;32(5):657-82. doi: 10.1111/jdv.14891  
28 439 3. Bousquet J, Schunemann HJ, Fonseca J, et al. MACVIA-ARIA Sentinel Network for  
29 440 allergic rhinitis (MASK-rhinitis): the new generation guideline  
30 441 implementation. *Allergy* 2015;70(11):1372-92. doi: 10.1111/all.12686  
31 442 4. Sasaki M, Koplin JJ, Dharmage SC, et al. Prevalence of clinic-defined food allergy in  
32 443 early adolescence: The SchoolNuts study. *The Journal of allergy and clinical*  
33 444 *immunology* 2018;141(1):391-98 e4. doi: 10.1016/j.jaci.2017.05.041  
34 445 5. Paller AS, Spergel JM, Mina-Osorio P, et al. The atopic march and atopic  
35 446 multimorbidity: Many trajectories, many pathways. *The Journal of allergy and*  
36 447 *clinical immunology* 2019;143(1):46-55. doi: 10.1016/j.jaci.2018.11.006  
37 448 6. Liang Y, Chang C, Lu Q. The Genetics and Epigenetics of Atopic Dermatitis-Filaggrin  
38 449 and Other Polymorphisms. *Clin Rev Allergy Immunol* 2016;51(3):315-28. doi:  
39 450 10.1007/s12016-015-8508-5 [published Online First: 2015/09/20]  
40 451 7. Chinthrajah RS, Hernandez JD, Boyd SD, et al. Molecular and cellular mechanisms  
41 452 of food allergy and food tolerance. *The Journal of allergy and clinical*  
42 453 *immunology* 2016;137(4):984-97. doi: 10.1016/j.jaci.2016.02.004 [published  
43 454 Online First: 2016/04/10]  
44 455 8. Shimura S, Takai T, Iida H, et al. Epicutaneous Allergic Sensitization by Cooperation  
45 456 between Allergen Protease Activity and Mechanical Skin Barrier Damage in  
46 457 Mice. *The Journal of investigative dermatology* 2016;136(7):1408-17. doi:  
47 458 10.1016/j.jid.2016.02.810 [published Online First: 2016/03/19]  
48 459 9. Guttman-Yassky E, Zhou L, Krueger JG. The skin as an immune organ: Tolerance  
49 460 versus effector responses and applications to food allergy and  
50 461 hypersensitivity reactions. *The Journal of allergy and clinical immunology*

- 1  
2  
3 462 2019;144(2):362-74. doi: 10.1016/j.jaci.2019.03.021 [published Online First:  
4 463 2019/04/08]  
5  
6 464 10. Chan SM, Turcanu V, Stephens AC, et al. Cutaneous lymphocyte antigen and  
7 465 alpha4beta7 T-lymphocyte responses are associated with peanut allergy and  
8 466 tolerance in children. *Allergy* 2012;67(3):336-42. doi: 10.1111/j.1398-  
9 467 9995.2011.02765.x [published Online First: 2012/03/17]  
10 468 11. Deckers J, Bougarne N, Mylka V, et al. Co-Activation of Glucocorticoid Receptor  
11 469 and Peroxisome Proliferator-Activated Receptor-gamma in Murine Skin  
12 470 Prevents Worsening of Atopic March. *The Journal of investigative dermatology*  
13 471 2018;138(6):1360-70. doi: 10.1016/j.jid.2017.12.023  
14  
15 472 12. Chalmers JR, Haines RH, Bradshaw LE, et al. Daily emollient during infancy for  
16 473 prevention of eczema: the BEEP randomised controlled trial. *Lancet*  
17 474 2020;395(10228):962-72. doi: 10.1016/S0140-6736(19)32984-8 [published  
18 475 Online First: 2020/02/23]  
19  
20 476 13. Eichenfield LF, Tom WL, Berger TG, et al. Guidelines of care for the management  
21 477 of atopic dermatitis: section 2. Management and treatment of atopic dermatitis  
22 478 with topical therapies. *Journal of the American Academy of Dermatology*  
23 479 2014;71(1):116-32. doi: 10.1016/j.jaad.2014.03.023 [published Online First:  
24 480 2014/05/13]  
25  
26 481 14. Skjerven HO, Rehbinder EM, Vettukattil R, et al. Skin emollient and early  
27 482 complementary feeding to prevent infant atopic dermatitis (PreventADALL):  
28 483 a factorial, multicentre, cluster-randomised trial. *Lancet*  
29 484 2020;395(10228):951-61. doi: 10.1016/S0140-6736(19)32983-6 [published  
30 485 Online First: 2020/02/23]  
31  
32 486 15. Horimukai K, Morita K, Narita M, et al. Application of moisturizer to neonates  
33 487 prevents development of atopic dermatitis. *The Journal of allergy and clinical*  
34 488 *immunology* 2014;134(4):824-30 e6. doi: 10.1016/j.jaci.2014.07.060  
35 489 16. McClanahan D, Wong A, Kezic S, et al. A randomized controlled trial of an emollient  
36 490 with ceramide and filaggrin-associated amino acids for the primary  
37 491 prevention of atopic dermatitis in high-risk infants. *Journal of the European*  
38 492 *Academy of Dermatology and Venereology : JEADV* 2019;33(11):2087-94. doi:  
39 493 10.1111/jdv.15786 [published Online First: 2019/07/10]  
40  
41 494 17. Simpson EL, Chalmers JR, Hanifin JM, et al. Emollient enhancement of the skin  
42 495 barrier from birth offers effective atopic dermatitis prevention. *The Journal of*  
43 496 *allergy and clinical immunology* 2014;134(4):818-23. doi:  
44 497 10.1016/j.jaci.2014.08.005  
45  
46 498 18. Health behavior and health education: Theory, research, and practice, 4th ed. San  
47 499 Francisco, CA, US: Jossey-Bass 2008.  
48 500 19. World Health Organization ROftEM. Health education: theoretical concepts,  
49 501 effective strategies and core competencies: a foundation document to guide  
50 502 capacity development of health educators, 2012.  
51 503 20. Tan X, Feldman SR, Chang J, et al. Topical drug delivery systems in dermatology: a  
52 504 review of patient adherence issues. *Expert opinion on drug delivery*  
53 505 2012;9(10):1263-71. doi: 10.1517/17425247.2012.711756  
54  
55 506 21. Zhao M, Liang Y, Shen C, et al. Patient Education Programs in Pediatric Atopic  
56 507 Dermatitis: A Systematic Review of Randomized Controlled Trials and Meta-

- 1  
2  
3 508 Analysis. *Dermatol Ther (Heidelb)* 2020;10(3):449-64. doi: 10.1007/s13555-  
4 509 020-00365-z [published Online First: 2020/03/23]  
5  
6 510 22. Sidbury R, Tom WL, Bergman JN, et al. Guidelines of care for the management of  
7 511 atopic dermatitis: Section 4. Prevention of disease flares and use of adjunctive  
8 512 therapies and approaches. *Journal of the American Academy of Dermatology*  
9 513 2014;71(6):1218-33. doi: 10.1016/j.jaad.2014.08.038  
10 514 23. Al-Ateeq MA, Al-Rusaiees AA. Health education during antenatal care: the need for  
11 515 more. *International journal of women's health* 2015;7:239-42. doi:  
12 516 10.2147/IJWH.S75164  
13  
14 517 24. Parat S, Negre V, Baptiste A, et al. Prenatal education of overweight or obese  
15 518 pregnant women to prevent childhood overweight (the ETOIG study): an  
16 519 open-label, randomized controlled trial. *International journal of obesity*  
17 520 2019;43(2):362-73. doi: 10.1038/s41366-018-0205-z  
18  
19 521 25. Suto M, Takehara K, Yamane Y, et al. Effects of prenatal childbirth education for  
20 522 partners of pregnant women on paternal postnatal mental health and couple  
21 523 relationship: A systematic review. *J Affect Disord* 2017;210:115-21. doi:  
22 524 10.1016/j.jad.2016.12.025 [published Online First: 2016/12/27]  
23  
24 525 26. Nnam NM. Improving maternal nutrition for better pregnancy outcomes. *Proc*  
25 526 *Nutr Soc* 2015;74(4):454-9. doi: 10.1017/S0029665115002396 [published  
26 527 Online First: 2015/08/13]  
27  
28 528 27. Basra MK, Gada V, Ungaro S, et al. Infants' Dermatitis Quality of Life Index: a  
29 529 decade of experience of validation and clinical application. *The British journal*  
30 530 *of dermatology* 2013;169(4):760-8. doi: 10.1111/bjd.12563 [published Online  
31 531 First: 2013/08/06]  
32  
33 532 28. Eichenfield LF, Tom WL, Chamlin SL, et al. Guidelines of care for the management  
34 533 of atopic dermatitis: section 1. Diagnosis and assessment of atopic dermatitis.  
35 534 *Journal of the American Academy of Dermatology* 2014;70(2):338-51. doi:  
36 535 10.1016/j.jaad.2013.10.010 [published Online First: 2013/12/03]  
37  
38 536 29. Mochizuki H, Kusuda S, Okada K, et al. Palivizumab Prophylaxis in Preterm Infants  
39 537 and Subsequent Recurrent Wheezing. Six-Year Follow-up Study. *Am J Respir*  
40 538 *Crit Care Med* 2017;196(1):29-38. doi: 10.1164/rccm.201609-1812OC  
41 539 [published Online First: 2017/02/06]  
42  
43 540 30. Ballardini N, Bergstrom A, Wahlgren CF, et al. IgE antibodies in relation to  
44 541 prevalence and multimorbidity of eczema, asthma, and rhinitis from birth to  
45 542 adolescence. *Allergy* 2016;71(3):342-9. doi: 10.1111/all.12798 [published  
46 543 Online First: 2015/10/28]  
47  
48 544 31. Wang H, Ma L, Tan Q, et al. Chinese Expert Consensus on the Diagnosis and  
49 545 Management of Food Allergy in Children With Atopic Dermatitis#. *2020*;  
50 546 3(3):135-41. doi: 10.1097/jd9.0000000000000091  
51 547 32. Okubo K, Kurono Y, Ichimura K, et al. Japanese guidelines for allergic rhinitis 2017.  
52 548 *Allergol Int* 2017;66(2):205-19. doi: 10.1016/j.alit.2016.11.001 [published  
53 549 Online First: 2017/02/19]  
54  
55 550 33. Scadding GK, Kariyawasam HH, Scadding G, et al. BSACI guideline for the diagnosis  
56 551 and management of allergic and non-allergic rhinitis (Revised Edition 2017;  
57 552 First edition 2007). *Clin Exp Allergy* 2017;47(7):856-89. doi:  
58 553 10.1111/cea.12953 [published Online First: 2017/07/01]

- 1  
2  
3 554 34. Arakawa H, Hamasaki Y, Kohno Y, et al. Japanese guidelines for childhood asthma  
4 555 2017. *Allergol Int* 2017;66(2):190-204. doi: 10.1016/j.alit.2016.11.003  
5 556 [published Online First: 2017/01/22]  
6  
7 557 35. Guo Y, Li P, Tang J, et al. Prevalence of Atopic Dermatitis in Chinese Children aged  
8 558 1-7 ys. *Scientific reports* 2016;6:29751. doi: 10.1038/srep29751  
9 559 36. Nakamura R, Ishiguro N, Naru E, et al. The effect of an educational program for  
10 560 pregnant women to prevent allergic diseases in infants: study protocol for a  
11 561 randomized controlled trial. *Trials* 2019;20(1):755. doi: 10.1186/s13063-  
12 562 019-3797-2 [published Online First: 2019/12/23]  
13  
14  
15  
16  
17  
18  
19  
20  
21  
22  
23  
24  
25  
26  
27  
28  
29  
30  
31  
32  
33  
34  
35  
36  
37  
38  
39  
40  
41  
42  
43  
44  
45  
46  
47  
48  
49  
50  
51  
52  
53  
54  
55  
56  
57  
58  
59  
60

1  
2  
3  
4  
5  
6  
7  
8  
9  
10  
11  
12  
13  
14  
15  
16  
17  
18  
19  
20  
21  
22  
23  
24  
25  
26  
27  
28  
29  
30  
31  
32  
33  
34  
35  
36  
37  
38  
39  
40  
41  
42  
43  
44  
45  
46  
47

564

For peer review only

Table 1. Outcome assessments of the PAEPAD study

| Outcomes                                      | Instruments/Diagnostic criteria                                                   | Immediately post intervention | Upon discharge from OB ward | Upon disease flares | 3 months postnatal | 2 year postnatal |
|-----------------------------------------------|-----------------------------------------------------------------------------------|-------------------------------|-----------------------------|---------------------|--------------------|------------------|
| Primary outcome                               |                                                                                   |                               |                             |                     |                    |                  |
| Cumulative incidence of AD at 2 years         | Hanifin&Rajak                                                                     |                               |                             |                     |                    | ×                |
| Secondary outcomes                            |                                                                                   |                               |                             |                     |                    |                  |
| AD outcomes                                   |                                                                                   |                               |                             |                     |                    |                  |
| Time to first AD episode                      | Hanifin&Rajak                                                                     |                               |                             | ×                   |                    |                  |
| Time to first topical corticosteroid exposure |                                                                                   |                               |                             | ×                   |                    |                  |
| Disease related quality of life               | IDQOL                                                                             |                               |                             | ×                   |                    |                  |
| Disease severity                              | SCORAD, EASI and IGA                                                              |                               |                             | ×                   |                    |                  |
| Frequency of AD flares                        |                                                                                   |                               |                             |                     |                    |                  |
| AD disease free days                          | IGA                                                                               |                               |                             |                     |                    |                  |
| Cumulative clinical visit duration            | From the parents being seated within the consulting room to their exit thereafter |                               |                             | ×                   |                    |                  |
| Atopic march outcomes                         |                                                                                   |                               |                             |                     |                    |                  |
| Asthma incidence                              |                                                                                   |                               |                             |                     |                    | ×                |
| Recurrent wheeze incidence                    |                                                                                   |                               |                             |                     |                    | ×                |

|    |                                    |                                               |   |  |  |  |   |  |   |
|----|------------------------------------|-----------------------------------------------|---|--|--|--|---|--|---|
| 1  |                                    |                                               |   |  |  |  |   |  |   |
| 2  |                                    |                                               |   |  |  |  |   |  |   |
| 3  |                                    |                                               |   |  |  |  |   |  |   |
| 4  |                                    |                                               |   |  |  |  |   |  |   |
| 5  | Rhinitis incidence                 |                                               |   |  |  |  |   |  | × |
| 6  | Food sensitization incidence       | Allergen specific IgE                         |   |  |  |  |   |  | × |
| 7  |                                    |                                               |   |  |  |  |   |  |   |
| 8  | Obstetric outcomes                 |                                               |   |  |  |  |   |  |   |
| 9  |                                    |                                               |   |  |  |  |   |  |   |
| 10 | Mode of birth                      | Eutocic/ dystocic/C-section                   |   |  |  |  |   |  | × |
| 11 |                                    |                                               |   |  |  |  |   |  |   |
| 12 |                                    |                                               |   |  |  |  |   |  |   |
| 13 |                                    |                                               |   |  |  |  |   |  |   |
| 14 |                                    |                                               |   |  |  |  |   |  |   |
| 15 |                                    |                                               |   |  |  |  |   |  |   |
| 16 |                                    | Gestational diabetes, pre-eclampsia, placenta |   |  |  |  |   |  |   |
| 17 |                                    | previa, placental                             |   |  |  |  |   |  |   |
| 18 |                                    | abruption, prelabor                           |   |  |  |  |   |  |   |
| 19 |                                    | rupture of membranes,                         |   |  |  |  |   |  |   |
| 20 |                                    | puerperal infection,                          |   |  |  |  |   |  |   |
| 21 |                                    | postpartum hemorrhage                         |   |  |  |  |   |  | × |
| 22 | Pathological pregnancy             |                                               |   |  |  |  |   |  |   |
| 23 | Neonatal outcomes:                 |                                               |   |  |  |  |   |  |   |
| 24 |                                    |                                               |   |  |  |  |   |  |   |
| 25 | Newborn.s weight                   |                                               |   |  |  |  |   |  | × |
| 26 |                                    |                                               |   |  |  |  |   |  |   |
| 27 | Admission in neonatal care         |                                               |   |  |  |  |   |  |   |
| 28 | unit (yes/no).                     |                                               |   |  |  |  |   |  | × |
| 29 | Apgar score                        |                                               |   |  |  |  |   |  | × |
| 30 | Fetal growth retardation           |                                               |   |  |  |  |   |  | × |
| 31 |                                    |                                               |   |  |  |  |   |  |   |
| 32 |                                    |                                               |   |  |  |  |   |  |   |
| 33 |                                    |                                               |   |  |  |  |   |  |   |
| 34 | Any morbidity of the newborn       |                                               |   |  |  |  |   |  |   |
| 35 | that results in hospitalization in |                                               |   |  |  |  |   |  |   |
| 36 | the first three month of life      |                                               |   |  |  |  |   |  | × |
| 37 |                                    |                                               |   |  |  |  |   |  |   |
| 38 | Patient disease knowledge and      | Questionnaire currently                       |   |  |  |  |   |  |   |
| 39 | attitude changes                   | under validation                              |   |  |  |  |   |  | × |
| 40 |                                    |                                               | × |  |  |  | × |  | × |
| 41 |                                    |                                               |   |  |  |  |   |  |   |
| 42 |                                    |                                               |   |  |  |  |   |  |   |
| 43 |                                    |                                               |   |  |  |  |   |  |   |
| 44 |                                    |                                               |   |  |  |  |   |  |   |
| 45 |                                    |                                               |   |  |  |  |   |  |   |
| 46 |                                    |                                               |   |  |  |  |   |  |   |
| 47 |                                    |                                               |   |  |  |  |   |  |   |

AD, atopic dermatitis; OB, obstetrics; IDQOL, Infantile Dermatitis Quality Of Life; SCORAD, SCORing of Atopic Dermatitis; EASI, Eczema Area and Severity Index; IGA, Investigator Global Assessment

565

Table 2. Biological sample collection at fixed follow-up visits

| Samples                         | GW12 | GW24-28 | GW36 | Delivery | 24-72h post-partum | 42 days post-partum | 3 months post-partum | 6 months post-partum | 12 months post-partum | 24 months post-partum |
|---------------------------------|------|---------|------|----------|--------------------|---------------------|----------------------|----------------------|-----------------------|-----------------------|
| Biological sample of the infant |      |         |      |          |                    |                     |                      |                      |                       |                       |
| Blood                           |      |         |      | ×        |                    |                     |                      |                      | ×                     | ×                     |
| Stool                           |      |         |      |          | ×                  | ×                   | ×                    | ×                    | ×                     | ×                     |
| Skin swab                       |      |         |      |          | ×                  | ×                   | ×                    |                      | ×                     | ×                     |
| Tongue dorsum swab              |      |         |      | ×        | ×                  | ×                   | ×                    | ×                    | ×                     | ×                     |
| Tape stripping                  |      |         |      | ×        | ×                  | ×                   | ×                    |                      | ×                     | ×                     |
| Biological sample of the mother |      |         |      |          |                    |                     |                      |                      |                       |                       |
| Blood                           |      | ×       | ×    | ×        | ×                  |                     |                      |                      |                       |                       |
| Stool                           | ×    | ×       | ×    |          |                    | ×                   | ×                    |                      |                       |                       |
| Urine                           | ×    | ×       | ×    |          | ×                  | ×                   | ×                    |                      | ×                     | ×                     |
| Skin swab                       |      | ×       | ×    |          | ×                  | ×                   | ×                    |                      |                       |                       |
| Breast milk                     |      |         |      |          | ×                  | ×                   | ×                    |                      |                       |                       |
| Placenta                        |      |         |      | ×        |                    |                     |                      |                      |                       |                       |
| Tongue dorsum swab              |      | ×       | ×    | ×        | ×                  | ×                   | ×                    |                      |                       |                       |



1  
2  
3  
4  
5  
6  
7  
8  
9  
10  
11  
12  
13  
14  
15  
16  
17  
18  
19  
20  
21  
22  
23  
24  
25  
26  
27  
28  
29  
30  
31  
32  
33  
34  
35  
36  
37  
38  
39  
40  
41  
42  
43  
44  
45  
46  
47

Vaginal  
swab

×

×

×

---

GW, gestational week

566

For peer review only

1  
2  
3 567 Figure legend

4 568 Fig.1 Flow diagram of the PAEPAD (Preventive Antenatal Educational Program on Allergic

5 569 Diseases) study.  
6  
7  
8  
9  
10  
11  
12  
13  
14  
15  
16  
17  
18  
19  
20  
21  
22  
23  
24  
25  
26  
27  
28  
29  
30  
31  
32  
33  
34  
35  
36  
37  
38  
39  
40  
41  
42  
43  
44  
45  
46  
47  
48  
49  
50  
51  
52  
53  
54  
55  
56  
57  
58  
59  
60

1  
2  
3  
4  
5  
6  
7  
8  
9  
10  
11  
12  
13  
14  
15  
16  
17  
18  
19  
20  
21  
22  
23  
24  
25  
26  
27  
28  
29  
30  
31  
32  
33  
34  
35  
36  
37  
38  
39  
40  
41  
42  
43  
44  
45  
46  
47  
48  
49  
50  
51  
52  
53

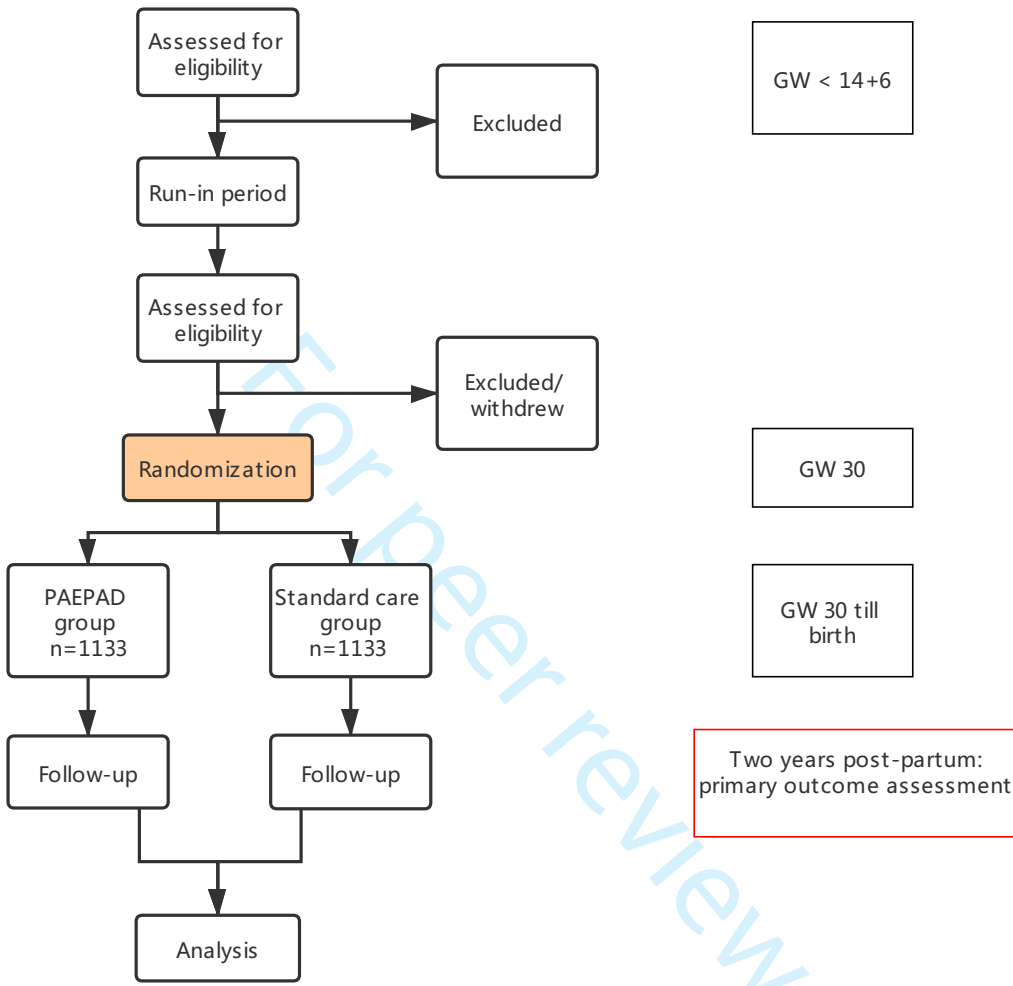

1  
2  
3 **Table of Contents**  
4

5  
6 **BIOLOGICAL SAMPLE COLLECTION .....2**  
7

8  
9 **TABLE S1. RESPONSES OF A 12-ITEM KNOWLEDGE SURVEY .....6**  
10  
11  
12  
13  
14  
15  
16  
17  
18  
19  
20  
21  
22  
23  
24  
25  
26  
27  
28  
29  
30  
31  
32  
33  
34  
35  
36  
37  
38  
39  
40  
41  
42  
43  
44  
45  
46  
47  
48  
49  
50  
51  
52  
53  
54  
55  
56  
57  
58  
59  
60

For peer review only

## **BIOLOGICAL SAMPLE COLLECTION**

### **Blood samples**

Blood samples will be collected for analyses of DNA, protein, and exosomes and isolation of Peripheral Blood Mononuclear Cells (PBMCs). The mothers will be asked to be fasting for 8 h or more before the blood draw. Blood samples will be kept at room temperature for 30 min before centrifugation. For DNA analyses, a blood sample of 2ml will be collected at gestational week 24-28 into EDTA tubes and stored at -80°C until use. For protein analyses, the serum will be centrifuged at 1000g for 15 min at room temperature and the supernatants will be aliquoted and stored at - 80 °C until use. For PBMC isolation, PBMC will be purified as previously described, and stored in liquid nitrogen for use<sup>1</sup>. For exosome analyses, 5ml of blood will be collected into EDTA tubes and stored at 4°C for 4 h or overnight. Plasma will be separated by centrifugation at 5000×g for 5 minutes at 4°C. Cell-free, platelet poor plasma will be collected, aliquoted and stored at - 80 °C until use<sup>2</sup>.

At birth, the venous and arterial cord blood will be collected from the umbilical cord into EDTA tubes using a syringe. Blood components will be processed and stored as detailed above for analyses of DNA, protein and exosomes. An additional 3mL arterial cord blood will be drawn and stored at room temperature for flow cytometric analysis.

At the year of two, children will be asked to test for serum specific allergens including house dust mite, cat dander, birch pollen, grass pollen, milk, and egg. If the parent consent to having their children's blood drawn, 2ml blood will be collected into tubes containing clot activator and centrifuged at 1000g for 15 min. The supernatant will be aliquoted into 500ul aliquotes and stored at - 80 °C until use.

### **Urine samples**

The first catch midstream urine of mothers will be collected using a sterile cup, centrifuged and added to sterile tubes and stored at -80 °C until analyzed.

### **Placenta**

After delivery, the placenta will be sampled for analyses of histology, DNA, methylation, RNA and protein. First, a cross-section 2cm away from the cord insertion will be sampled and stored in formalin to be fixed for histological examination. Next, twenty pieces of villous tissue on the maternal aspect measuring 3\*3\*3mm will be taken at 2-4cm away from cord insertion and stored in five cryo-tubes, among which two will be prefilled with RNAlater. Villous samples will be snap-frozen in liquid nitrogen and then stored at -80°C. Third, villous tissue on the fetal aspect will be sampled and stored likewise.

### **Breast milk**

1  
2  
3 Breast milk will be collected with a breast pump at locations where postnatal follow-ups take  
4 place. At follow-up, 30ml of breast milk will be collected with sterilized RNase-free tubes,  
5 with the first 500ul disposed. For exosome analysis, 15 ml breast milk will be centrifuged at  
6 4°C for 10 minutes at 1500 g to remove cells and the cream layer. The supernatant will then  
7 be transferred to new tubes and centrifuged again at 12,000 g at 4°C to remove remaining  
8 cells and cream. The supernatant will then be immediately processed or frozen at -80 °C until  
9 use<sup>3</sup>. The remaining 15 ml breast milk sample will be aliquoted and stored at -80 °C directly  
10 until use.  
11

### 12 **Feces**

13 The fecal samples will be self-collected by participants. For 16s RNA sequencing,  
14 participants will be provided with a sterile feces collection and preservation kit (ML-001A,  
15 Shenzhen Dayun Gene Technology Co., Shenzhen, China). For metabolomics analyses,  
16 participants will be provided with a sterile feces collection device with a spatula. Participants  
17 will be instructed to collect stool specimens of approximately 10ml within 2 h before each  
18 visit and bring them to the visits. Collected feces will then be snap-frozen in liquid nitrogen  
19 and stored at -80 °C until use<sup>4</sup>. Meconium of 2ml will be sampled and stored likewise.  
20

### 21 **Vagina swab**

22 Vaginal swabs (4520CA, COPAN Flock Technologies, Brescia, Italy) will be collected from  
23 the posterior fornix by obstetricians. A speculum will be placed in the absence of lubrication.  
24 All specimens will be collected by swirling a sterile swab for 30 seconds, withdrawing the  
25 swab without contamination from other sites, and transferring the specimen into a sterile tube  
26 and stored at -80 °C until use.  
27

### 28 **Skin swab**

29 Skin specimens will be collected from the cheek, anterior forearm, and lesional sites of the  
30 children. The forehead, anterior forearm, and cubital fossa of the mother will be sampled  
31 likewise. These sites will be swiped vigorously for 50 times over an area of 4 cm<sup>2</sup> using a  
32 sterile swab (4520CA, COPAN Flock Technologies, Brescia, Italy). The swab will be  
33 premoistened with DNA free saline. Swab specimens will be inserted into a sterile tube and  
34 stored at -80 °C until use.  
35

### 36 **Tape stripping**

37 For each child, skin lipids will be collected by tape stripping from the same body sites as to  
38 where skin swabs are sampled from the children. The first layer will be discarded, and the  
39 second to fourth layers at the same place will be retained and placed separately in a glass tube  
40  
41  
42  
43  
44  
45  
46  
47  
48  
49  
50  
51  
52  
53  
54  
55  
56  
57  
58  
59  
60

1  
2  
3 with 5 mL of methanol, then stored at -80 °C until use. The vernix will be sampled from the  
4 back of the newborn likewise.

5  
6 **Tongue dorsum swab**

7  
8 Subjects will be instructed not to eat, drink (except water), or brush their tongue during the  
9 12 h period before sampling and not to brush their teeth during the 2 h period before  
10 sampling. Specimens will be collected from the central part of the tongue dorsum by swiping  
11 for 15 seconds using a sterile swab (4520CA, COPAN Flock Technologies, Brescia, Italy).  
12  
13  
14  
15  
16  
17  
18  
19  
20  
21  
22  
23  
24  
25  
26  
27  
28  
29  
30  
31  
32  
33  
34  
35  
36  
37  
38  
39  
40  
41  
42  
43  
44  
45  
46  
47  
48  
49  
50  
51  
52  
53  
54  
55  
56  
57  
58  
59  
60

For peer review only

## References

1. Riedhammer C, Halbritter D, Weissert R. Peripheral Blood Mononuclear Cells: Isolation, Freezing, Thawing, and Culture. *Methods Mol Biol* 2016;1304:53-61. doi: 10.1007/7651\_2014\_99 [published Online First: 2014/08/06]
2. Stranska R, Gysbrechts L, Wouters J, et al. Comparison of membrane affinity-based method with size-exclusion chromatography for isolation of exosome-like vesicles from human plasma. *J Transl Med* 2018;16(1):1. doi: 10.1186/s12967-017-1374-6 [published Online First: 2018/01/11]
3. Zonneveld MI, Brisson AR, van Herwijnen MJ, et al. Recovery of extracellular vesicles from human breast milk is influenced by sample collection and vesicle isolation procedures. *J Extracell Vesicles* 2014;3 doi: 10.3402/jev.v3.24215 [published Online First: 2014/09/11]
4. Costea PI, Zeller G, Sunagawa S, et al. Towards standards for human fecal sample processing in metagenomic studies. *Nature biotechnology* 2017;35(11):1069-76. doi: 10.1038/nbt.3960



**Table S1. Responses of a 12-item Knowledge survey**

| Survey questions                                            | Score | Number answered<br>(n=395), n (%) |
|-------------------------------------------------------------|-------|-----------------------------------|
|                                                             | 1     | 17 (4.30)                         |
|                                                             | 2     | 61 (15.44)                        |
| 1. I should apply body wash every time I bathe my baby.     | 3     | 61 (15.44)                        |
|                                                             | 4     | 124 (31.39)                       |
|                                                             | 5     | 132 (33.42)                       |
|                                                             | 1     | 27(6.84)                          |
|                                                             | 2     | 86(21.77)                         |
| 2. Moisturizer should be applied all over my baby's body.   | 3     | 76(19.24)                         |
|                                                             | 4     | 128(32.41)                        |
|                                                             | 5     | 78(19.75)                         |
|                                                             | 1     | 55 (13.92)                        |
|                                                             | 2     | 109 (27.59)                       |
| 3. Moisturizer should be used no more than once a day.      | 3     | 121 (30.63)                       |
|                                                             | 4     | 91 (23.04)                        |
|                                                             | 5     | 19 (4.81)                         |
|                                                             | 1     | 25(6.33)                          |
|                                                             | 2     | 65(16.46)                         |
|                                                             | 3     | 79(20.00)                         |
| 4. I only use moisturizer after I bathe my baby.            | 4     | 170(43.04)                        |
|                                                             | 5     | 56(14.18)                         |
|                                                             | 1     | 32 (8.10)                         |
|                                                             | 2     | 96 (24.30)                        |
| 5. Massage oils can be used as a baby moisturizer.          | 3     | 112 (28.35)                       |
|                                                             | 4     | 112 (28.35)                       |
|                                                             | 5     | 43 (10.89)                        |
|                                                             | 1     | 10(2.53)                          |
|                                                             | 2     | 36(9.11)                          |
| 6. Moisturizer is not necessary for my baby at summer time. | 3     | 72(18.23)                         |
|                                                             | 4     | 160(40.51)                        |
|                                                             | 5     | 117(29.62)                        |
|                                                             | 1     | 39 (9.87)                         |
| 7. Sweat is an irritant to the baby's skin.                 | 2     | 54 (13.67)                        |
|                                                             | 3     | 95 (24.5)                         |

|                                                                                                                          |   |             |
|--------------------------------------------------------------------------------------------------------------------------|---|-------------|
|                                                                                                                          | 4 | 105 (26.58) |
|                                                                                                                          | 5 | 102 (25.82) |
|                                                                                                                          | 1 | 103(26.08)  |
|                                                                                                                          | 2 | 81(20.51)   |
| 8. I'm concerned to use topical corticosteroids ointment on my baby.                                                     | 3 | 149(37.72)  |
|                                                                                                                          | 4 | 37(9.37)    |
|                                                                                                                          | 5 | 25(6.33)    |
|                                                                                                                          | 1 | 43(10.89)   |
|                                                                                                                          | 2 | 53(13.42)   |
| 9. Topical corticosteroids will make the baby fat.                                                                       | 3 | 124(31.39)  |
|                                                                                                                          | 4 | 105(26.58)  |
|                                                                                                                          | 5 | 70(17.72)   |
|                                                                                                                          | 1 | 69(17.47)   |
|                                                                                                                          | 2 | 47(11.9)    |
| 10. Topical corticosteroids will induce premature puberty in babies.                                                     | 3 | 138(34.94)  |
|                                                                                                                          | 4 | 88(22.28)   |
|                                                                                                                          | 5 | 53(13.42)   |
|                                                                                                                          | 1 | 93(23.54)   |
|                                                                                                                          | 2 | 67(16.96)   |
| 11. If I had to use topical corticosteroids on my baby, I'd be concerned that my baby will become addicted to the drug.  | 3 | 140(35.44)  |
|                                                                                                                          | 4 | 59(14.94)   |
|                                                                                                                          | 5 | 36(9.11)    |
|                                                                                                                          | 1 | 88(22.28)   |
|                                                                                                                          | 2 | 89(22.53)   |
| 12. If I had to use topical corticosteroids on my baby, I'd be concerned that my baby will become resistant to the drug. | 3 | 135(34.18)  |
|                                                                                                                          | 4 | 57(14.43)   |
|                                                                                                                          | 5 | 26(6.58)    |

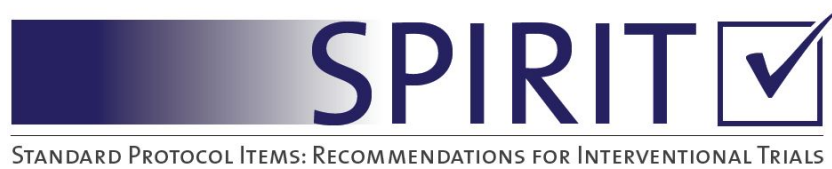

SPIRIT 2013 Checklist: Recommended items to address in a clinical trial protocol and related documents\*

| Section/item                      | ItemNo | Description                                                                                                                                                                                                                                                                              | Page No.              |
|-----------------------------------|--------|------------------------------------------------------------------------------------------------------------------------------------------------------------------------------------------------------------------------------------------------------------------------------------------|-----------------------|
| <b>Administrative information</b> |        |                                                                                                                                                                                                                                                                                          |                       |
| Title                             | 1      | Descriptive title identifying the study design, population, interventions, and, if applicable, trial acronym                                                                                                                                                                             | 1                     |
| Trial registration                | 2a     | Trial identifier and registry name. If not yet registered, name of intended registry                                                                                                                                                                                                     | 3, Line 51            |
|                                   | 2b     | All items from the World Health Organization Trial Registration Data Set                                                                                                                                                                                                                 | Refer to the appendix |
| Protocol version                  | 3      | Date and version identifier                                                                                                                                                                                                                                                              | 6, Line 144           |
| Funding                           | 4      | Sources and types of financial, material, and other support                                                                                                                                                                                                                              | 15, Line 418          |
| Roles and responsibilities        | 5a     | Names, affiliations, and roles of protocol contributors                                                                                                                                                                                                                                  | 14 Line 404           |
|                                   | 5b     | Name and contact information for the trial sponsor                                                                                                                                                                                                                                       | 15, Line 418          |
|                                   | 5c     | Role of study sponsor and funders, if any, in study design; collection, management, analysis, and interpretation of data; writing of the report; and the decision to submit the report for publication, including whether they will have ultimate authority over any of these activities | 15 Line 420           |
|                                   | 5d     | Composition, roles, and responsibilities of the coordinating centre, steering committee, endpoint adjudication committee, data management team, and other individuals or groups overseeing the trial, if applicable (see Item 21a for data monitoring committee)                         | 12 Line 334           |

**Introduction**

|    |                |    |                                                     |            |
|----|----------------|----|-----------------------------------------------------|------------|
| 1  |                |    |                                                     |            |
| 2  | Background and | 6a | Description of research question and                | 3 Line 61  |
| 3  | rationale      |    | justification for undertaking the trial, including  |            |
| 4  |                |    | summary of relevant studies (published and          |            |
| 5  |                |    | unpublished) examining benefits and harms           |            |
| 6  |                |    | for each intervention                               |            |
| 7  |                |    |                                                     |            |
| 8  |                | 6b | Explanation for choice of comparators               | 5 Line 125 |
| 9  |                |    |                                                     |            |
| 10 | Objectives     | 7  | Specific objectives or hypotheses                   | 5 Line 126 |
| 11 |                |    |                                                     |            |
| 12 | Trial design   | 8  | Description of trial design including type of trial | 5 Line 125 |
| 13 |                |    | (eg, parallel group, crossover, factorial, single   |            |
| 14 |                |    | group), allocation ratio, and framework (eg,        |            |
| 15 |                |    | superiority, equivalence, noninferiority,           |            |
| 16 |                |    | exploratory)                                        |            |
| 17 |                |    |                                                     |            |
| 18 |                |    |                                                     |            |
| 19 |                |    |                                                     |            |

### Methods: Participants, interventions, and outcomes

|    |                      |     |                                                       |                 |
|----|----------------------|-----|-------------------------------------------------------|-----------------|
| 20 |                      |     |                                                       |                 |
| 21 |                      |     |                                                       |                 |
| 22 | Study setting        | 9   | Description of study settings (eg, community          | 5 Line 136      |
| 23 |                      |     | clinic, academic hospital) and list of countries      |                 |
| 24 |                      |     | where data will be collected. Reference to            |                 |
| 25 |                      |     | where list of study sites can be obtained             |                 |
| 26 |                      |     |                                                       |                 |
| 27 | Eligibility criteria | 10  | Inclusion and exclusion criteria for participants.    | 6 Line 169      |
| 28 |                      |     | If applicable, eligibility criteria for study centres |                 |
| 29 |                      |     | and individuals who will perform the                  |                 |
| 30 |                      |     | interventions (eg, surgeons, psychotherapists)        |                 |
| 31 |                      |     |                                                       |                 |
| 32 |                      |     |                                                       |                 |
| 33 | Interventions        | 11a | Interventions for each group with sufficient          | 8 Line 201      |
| 34 |                      |     | detail to allow replication, including how and        |                 |
| 35 |                      |     | when they will be administered                        |                 |
| 36 |                      |     |                                                       |                 |
| 37 |                      | 11b | Criteria for discontinuing or modifying               | Non             |
| 38 |                      |     | allocated interventions for a given trial             | pharmacological |
| 39 |                      |     | participant (eg, drug dose change in response         | intervention.   |
| 40 |                      |     | to harms, participant request, or                     | NA.             |
| 41 |                      |     | improving/worsening disease)                          |                 |
| 42 |                      |     |                                                       |                 |
| 43 |                      |     |                                                       |                 |
| 44 |                      | 11c | Strategies to improve adherence to                    | 8 Line 201- 6   |
| 45 |                      |     | intervention protocols, and any procedures for        |                 |
| 46 |                      |     | monitoring adherence (eg, drug tablet return,         |                 |
| 47 |                      |     | laboratory tests)                                     |                 |
| 48 |                      |     |                                                       |                 |
| 49 |                      |     |                                                       |                 |
| 50 |                      | 11d | Relevant concomitant care and interventions           | 9 Line 260      |
| 51 |                      |     | that are permitted or prohibited during the trial     |                 |
| 52 |                      |     |                                                       |                 |
| 53 |                      |     |                                                       |                 |
| 54 |                      |     |                                                       |                 |
| 55 |                      |     |                                                       |                 |
| 56 |                      |     |                                                       |                 |
| 57 |                      |     |                                                       |                 |
| 58 |                      |     |                                                       |                 |
| 59 |                      |     |                                                       |                 |
| 60 |                      |     |                                                       |                 |

|    |             |    |                                                 |             |
|----|-------------|----|-------------------------------------------------|-------------|
| 1  |             |    |                                                 |             |
| 2  | Outcomes    | 12 | Primary, secondary, and other outcomes,         | 8 Line 228  |
| 3  |             |    | including the specific measurement variable     |             |
| 4  |             |    | (eg, systolic blood pressure), analysis metric  |             |
| 5  |             |    | (eg, change from baseline, final value, time to |             |
| 6  |             |    | event), method of aggregation (eg, median,      |             |
| 7  |             |    | proportion), and time point for each outcome.   |             |
| 8  |             |    | Explanation of the clinical relevance of chosen |             |
| 9  |             |    | efficacy and harm outcomes is strongly          |             |
| 10 |             |    | recommended                                     |             |
| 11 |             |    |                                                 |             |
| 12 |             |    |                                                 |             |
| 13 | Participant | 13 | Time schedule of enrolment, interventions       | Fig.1       |
| 14 | timeline    |    | (including any run-ins and washouts),           |             |
| 15 |             |    | assessments, and visits for participants. A     |             |
| 16 |             |    | schematic diagram is highly recommended         |             |
| 17 |             |    | (see Figure)                                    |             |
| 18 |             |    |                                                 |             |
| 19 |             |    |                                                 |             |
| 20 | Sample size | 14 | Estimated number of participants needed to      | 11 Line 294 |
| 21 |             |    | achieve study objectives and how it was         |             |
| 22 |             |    | determined, including clinical and statistical  |             |
| 23 |             |    | assumptions supporting any sample size          |             |
| 24 |             |    | calculations                                    |             |
| 25 |             |    |                                                 |             |
| 26 |             |    |                                                 |             |
| 27 | Recruitment | 15 | Strategies for achieving adequate participant   | 6 Line 148  |
| 28 |             |    | enrolment to reach target sample size           |             |
| 29 |             |    |                                                 |             |

### Methods: Assignment of interventions (for controlled trials)

#### Allocation:

|    |                |     |                                                   |            |
|----|----------------|-----|---------------------------------------------------|------------|
| 33 |                |     |                                                   |            |
| 34 |                |     |                                                   |            |
| 35 | Sequence       | 16a | Method of generating the allocation sequence      | 7 Line 187 |
| 36 | generation     |     | (eg, computer-generated random numbers),          |            |
| 37 |                |     | and list of any factors for stratification. To    |            |
| 38 |                |     | reduce predictability of a random sequence,       |            |
| 39 |                |     | details of any planned restriction (eg, blocking) |            |
| 40 |                |     | should be provided in a separate document         |            |
| 41 |                |     | that is unavailable to those who enrol            |            |
| 42 |                |     | participants or assign interventions              |            |
| 43 |                |     |                                                   |            |
| 44 |                |     |                                                   |            |
| 45 | Allocation     | 16b | Mechanism of implementing the allocation          | 7 Line 193 |
| 46 | concealment    |     | sequence (eg, central telephone; sequentially     |            |
| 47 | mechanism      |     | numbered, opaque, sealed envelopes),              |            |
| 48 |                |     | describing any steps to conceal the sequence      |            |
| 49 |                |     | until interventions are assigned                  |            |
| 50 |                |     |                                                   |            |
| 51 |                |     |                                                   |            |
| 52 | Implementation | 16c | Who will generate the allocation sequence,        | 7 Line 187 |
| 53 |                |     | who will enrol participants, and who will assign  |            |
| 54 |                |     | participants to interventions                     |            |
| 55 |                |     |                                                   |            |
| 56 |                |     |                                                   |            |
| 57 |                |     |                                                   |            |
| 58 |                |     |                                                   |            |
| 59 |                |     |                                                   |            |
| 60 |                |     |                                                   |            |

|    |           |     |                                                  |                 |
|----|-----------|-----|--------------------------------------------------|-----------------|
| 1  |           |     |                                                  |                 |
| 2  | Blinding  | 17a | Who will be blinded after assignment to          | 7 Line 196      |
| 3  | (masking) |     | interventions (eg, trial participants, care      |                 |
| 4  |           |     | providers, outcome assessors, data analysts),    |                 |
| 5  |           |     | and how                                          |                 |
| 6  |           |     |                                                  |                 |
| 7  |           | 17b | If blinded, circumstances under which            | Non             |
| 8  |           |     | unblinding is permissible, and procedure for     | pharmacological |
| 9  |           |     | revealing a participant's allocated intervention | intervention.   |
| 10 |           |     | during the trial                                 | NA.             |
| 11 |           |     |                                                  |                 |
| 12 |           |     |                                                  |                 |

### Methods: Data collection, management, and analysis

|    |                 |     |                                                    |             |
|----|-----------------|-----|----------------------------------------------------|-------------|
| 13 |                 |     |                                                    |             |
| 14 |                 |     |                                                    |             |
| 15 | Data collection | 18a | Plans for assessment and collection of             | 8 Line 227  |
| 16 | methods         |     | outcome, baseline, and other trial data,           |             |
| 17 |                 |     | including any related processes to promote         |             |
| 18 |                 |     | data quality (eg, duplicate measurements,          |             |
| 19 |                 |     | training of assessors) and a description of        |             |
| 20 |                 |     | study instruments (eg, questionnaires,             |             |
| 21 |                 |     | laboratory tests) along with their reliability and |             |
| 22 |                 |     | validity, if known. Reference to where data        |             |
| 23 |                 |     | collection forms can be found, if not in the       |             |
| 24 |                 |     | protocol                                           |             |
| 25 |                 |     |                                                    |             |
| 26 |                 |     |                                                    |             |
| 27 |                 |     |                                                    |             |
| 28 |                 | 18b | Plans to promote participant retention and         | 10 Line 269 |
| 29 |                 |     | complete follow-up, including list of any          |             |
| 30 |                 |     | outcome data to be collected for participants      |             |
| 31 |                 |     | who discontinue or deviate from intervention       |             |
| 32 |                 |     | protocols                                          |             |
| 33 |                 |     |                                                    |             |
| 34 |                 |     |                                                    |             |
| 35 | Data            | 19  | Plans for data entry, coding, security, and        | 10 Line 269 |
| 36 | management      |     | storage, including any related processes to        |             |
| 37 |                 |     | promote data quality (eg, double data entry;       |             |
| 38 |                 |     | range checks for data values). Reference to        |             |
| 39 |                 |     | where details of data management procedures        |             |
| 40 |                 |     | can be found, if not in the protocol               |             |
| 41 |                 |     |                                                    |             |
| 42 |                 |     |                                                    |             |
| 43 | Statistical     | 20a | Statistical methods for analysing primary and      | 14 Line 392 |
| 44 | methods         |     | secondary outcomes. Reference to where             |             |
| 45 |                 |     | other details of the statistical analysis plan can |             |
| 46 |                 |     | be found, if not in the protocol                   |             |
| 47 |                 |     |                                                    |             |
| 48 |                 |     |                                                    |             |
| 49 |                 | 20b | Methods for any additional analyses (eg,           | 14 Line 406 |
| 50 |                 |     | subgroup and adjusted analyses)                    |             |
| 51 |                 |     |                                                    |             |
| 52 |                 | 20c | Definition of analysis population relating to      | 13 Line 381 |
| 53 |                 |     | protocol non-adherence (eg, as randomised          |             |
| 54 |                 |     | analysis), and any statistical methods to          |             |
| 55 |                 |     | handle missing data (eg, multiple imputation)      |             |
| 56 |                 |     |                                                    |             |
| 57 |                 |     |                                                    |             |

### Methods: Monitoring

|    |                                 |     |                                                                                                                                                                                                                                                                                                                                       |                                       |
|----|---------------------------------|-----|---------------------------------------------------------------------------------------------------------------------------------------------------------------------------------------------------------------------------------------------------------------------------------------------------------------------------------------|---------------------------------------|
| 1  |                                 |     |                                                                                                                                                                                                                                                                                                                                       |                                       |
| 2  | Data monitoring                 | 21a | Composition of data monitoring committee (DMC); summary of its role and reporting structure; statement of whether it is independent from the sponsor and competing interests; and reference to where further details about its charter can be found, if not in the protocol. Alternatively, an explanation of why a DMC is not needed | 12 Line 334                           |
| 3  |                                 |     |                                                                                                                                                                                                                                                                                                                                       |                                       |
| 4  |                                 |     |                                                                                                                                                                                                                                                                                                                                       |                                       |
| 5  |                                 |     |                                                                                                                                                                                                                                                                                                                                       |                                       |
| 6  |                                 |     |                                                                                                                                                                                                                                                                                                                                       |                                       |
| 7  |                                 |     |                                                                                                                                                                                                                                                                                                                                       |                                       |
| 8  |                                 |     |                                                                                                                                                                                                                                                                                                                                       |                                       |
| 9  |                                 |     |                                                                                                                                                                                                                                                                                                                                       |                                       |
| 10 |                                 |     |                                                                                                                                                                                                                                                                                                                                       |                                       |
| 11 |                                 |     |                                                                                                                                                                                                                                                                                                                                       |                                       |
| 12 |                                 | 21b | Description of any interim analyses and stopping guidelines, including who will have access to these interim results and make the final decision to terminate the trial                                                                                                                                                               | 12 Line 337                           |
| 13 |                                 |     |                                                                                                                                                                                                                                                                                                                                       |                                       |
| 14 |                                 |     |                                                                                                                                                                                                                                                                                                                                       |                                       |
| 15 |                                 |     |                                                                                                                                                                                                                                                                                                                                       |                                       |
| 16 |                                 |     |                                                                                                                                                                                                                                                                                                                                       |                                       |
| 17 |                                 |     |                                                                                                                                                                                                                                                                                                                                       |                                       |
| 18 | Harms                           | 22  | Plans for collecting, assessing, reporting, and managing solicited and spontaneously reported adverse events and other unintended effects of trial interventions or trial conduct                                                                                                                                                     | Non pharmacological intervention. NA. |
| 19 |                                 |     |                                                                                                                                                                                                                                                                                                                                       |                                       |
| 20 |                                 |     |                                                                                                                                                                                                                                                                                                                                       |                                       |
| 21 |                                 |     |                                                                                                                                                                                                                                                                                                                                       |                                       |
| 22 |                                 |     |                                                                                                                                                                                                                                                                                                                                       |                                       |
| 23 |                                 |     |                                                                                                                                                                                                                                                                                                                                       |                                       |
| 24 | Auditing                        | 23  | Frequency and procedures for auditing trial conduct, if any, and whether the process will be independent from investigators and the sponsor                                                                                                                                                                                           | Not reported                          |
| 25 |                                 |     |                                                                                                                                                                                                                                                                                                                                       |                                       |
| 26 |                                 |     |                                                                                                                                                                                                                                                                                                                                       |                                       |
| 27 |                                 |     |                                                                                                                                                                                                                                                                                                                                       |                                       |
| 28 |                                 |     |                                                                                                                                                                                                                                                                                                                                       |                                       |
| 29 |                                 |     |                                                                                                                                                                                                                                                                                                                                       |                                       |
| 30 | <b>Ethics and dissemination</b> |     |                                                                                                                                                                                                                                                                                                                                       |                                       |
| 31 |                                 |     |                                                                                                                                                                                                                                                                                                                                       |                                       |
| 32 | Research ethics approval        | 24  | Plans for seeking research ethics committee/institutional review board (REC/IRB) approval                                                                                                                                                                                                                                             | 12 Line 344                           |
| 33 |                                 |     |                                                                                                                                                                                                                                                                                                                                       |                                       |
| 34 |                                 |     |                                                                                                                                                                                                                                                                                                                                       |                                       |
| 35 |                                 |     |                                                                                                                                                                                                                                                                                                                                       |                                       |
| 36 | Protocol amendments             | 25  | Plans for communicating important protocol modifications (eg, changes to eligibility criteria, outcomes, analyses) to relevant parties (eg, investigators, REC/IRBs, trial participants, trial registries, journals, regulators)                                                                                                      | NA                                    |
| 37 |                                 |     |                                                                                                                                                                                                                                                                                                                                       |                                       |
| 38 |                                 |     |                                                                                                                                                                                                                                                                                                                                       |                                       |
| 39 |                                 |     |                                                                                                                                                                                                                                                                                                                                       |                                       |
| 40 |                                 |     |                                                                                                                                                                                                                                                                                                                                       |                                       |
| 41 |                                 |     |                                                                                                                                                                                                                                                                                                                                       |                                       |
| 42 |                                 |     |                                                                                                                                                                                                                                                                                                                                       |                                       |
| 43 | Consent or assent               | 26a | Who will obtain informed consent or assent from potential trial participants or authorised surrogates, and how (see Item 32)                                                                                                                                                                                                          | 6 Line 153                            |
| 44 |                                 |     |                                                                                                                                                                                                                                                                                                                                       |                                       |
| 45 |                                 |     |                                                                                                                                                                                                                                                                                                                                       |                                       |
| 46 |                                 |     |                                                                                                                                                                                                                                                                                                                                       |                                       |
| 47 |                                 |     |                                                                                                                                                                                                                                                                                                                                       |                                       |
| 48 |                                 | 26b | Additional consent provisions for collection and use of participant data and biological specimens in ancillary studies, if applicable                                                                                                                                                                                                 | 6 Line 153                            |
| 49 |                                 |     |                                                                                                                                                                                                                                                                                                                                       |                                       |
| 50 |                                 |     |                                                                                                                                                                                                                                                                                                                                       |                                       |
| 51 |                                 |     |                                                                                                                                                                                                                                                                                                                                       |                                       |
| 52 | Confidentiality                 | 27  | How personal information about potential and enrolled participants will be collected, shared, and maintained in order to protect confidentiality before, during, and after the trial                                                                                                                                                  | 10 Line 283                           |
| 53 |                                 |     |                                                                                                                                                                                                                                                                                                                                       |                                       |
| 54 |                                 |     |                                                                                                                                                                                                                                                                                                                                       |                                       |
| 55 |                                 |     |                                                                                                                                                                                                                                                                                                                                       |                                       |
| 56 |                                 |     |                                                                                                                                                                                                                                                                                                                                       |                                       |
| 57 |                                 |     |                                                                                                                                                                                                                                                                                                                                       |                                       |
| 58 |                                 |     |                                                                                                                                                                                                                                                                                                                                       |                                       |
| 59 |                                 |     |                                                                                                                                                                                                                                                                                                                                       |                                       |
| 60 |                                 |     |                                                                                                                                                                                                                                                                                                                                       |                                       |

|    |                   |     |                                                   |                 |
|----|-------------------|-----|---------------------------------------------------|-----------------|
| 1  |                   |     |                                                   |                 |
| 2  | Declaration of    | 28  | Financial and other competing interests for       | 15 Line 422     |
| 3  | interests         |     | principal investigators for the overall trial and |                 |
| 4  |                   |     | each study site                                   |                 |
| 5  |                   |     |                                                   |                 |
| 6  | Access to data    | 29  | Statement of who will have access to the final    | 10 Line 283, 12 |
| 7  |                   |     | trial dataset, and disclosure of contractual      | Line 350        |
| 8  |                   |     | agreements that limit such access for             |                 |
| 9  |                   |     | investigators                                     |                 |
| 10 |                   |     |                                                   |                 |
| 11 | Ancillary and     | 30  | Provisions, if any, for ancillary and post-trial  | None            |
| 12 | post-trial care   |     | care, and for compensation to those who           |                 |
| 13 |                   |     | suffer harm from trial participation              |                 |
| 14 |                   |     |                                                   |                 |
| 15 |                   |     |                                                   |                 |
| 16 | Dissemination     | 31a | Plans for investigators and sponsor to            | 12 Line 343     |
| 17 | policy            |     | communicate trial results to participants,        |                 |
| 18 |                   |     | healthcare professionals, the public, and other   |                 |
| 19 |                   |     | relevant groups (eg, via publication, reporting   |                 |
| 20 |                   |     | in results databases, or other data sharing       |                 |
| 21 |                   |     | arrangements), including any publication          |                 |
| 22 |                   |     | restrictions                                      |                 |
| 23 |                   |     |                                                   |                 |
| 24 |                   |     |                                                   |                 |
| 25 |                   |     |                                                   |                 |
| 26 |                   | 31b | Authorship eligibility guidelines and any         | 14 Line 409     |
| 27 |                   |     | intended use of professional writers              |                 |
| 28 |                   |     |                                                   |                 |
| 29 |                   | 31c | Plans, if any, for granting public access to the  | Not reported    |
| 30 |                   |     | full protocol, participant-level dataset, and     |                 |
| 31 |                   |     | statistical code                                  |                 |
| 32 |                   |     |                                                   |                 |
| 33 |                   |     |                                                   |                 |
| 34 | <b>Appendices</b> |     |                                                   |                 |
| 35 |                   |     |                                                   |                 |
| 36 | Informed consent  | 32  | Model consent form and other related              | Available upon  |
| 37 | materials         |     | documentation given to participants and           | request         |
| 38 |                   |     | authorised surrogates                             |                 |
| 39 |                   |     |                                                   |                 |
| 40 | Biological        | 33  | Plans for collection, laboratory evaluation, and  | 10 Line 287,    |
| 41 | specimens         |     | storage of biological specimens for genetic or    | supplementary   |
| 42 |                   |     | molecular analysis in the current trial and for   | material        |
| 43 |                   |     | future use in ancillary studies, if applicable    |                 |
| 44 |                   |     |                                                   |                 |

\*It is strongly recommended that this checklist be read in conjunction with the SPIRIT 2013 Explanation & Elaboration for important clarification on the items. Amendments to the protocol should be tracked and dated. The SPIRIT checklist is copyrighted by the SPIRIT Group under the Creative Commons "[Attribution-NonCommercial-NoDerivs 3.0 Unported](https://creativecommons.org/licenses/by-nc-nd/3.0/)" license.



## Appendix. World Health Organization Trial Registration Data Set

| Data category                                 | Information                                                                                                                                                                                                                                                                                                                                                                                                                                                                                                  |
|-----------------------------------------------|--------------------------------------------------------------------------------------------------------------------------------------------------------------------------------------------------------------------------------------------------------------------------------------------------------------------------------------------------------------------------------------------------------------------------------------------------------------------------------------------------------------|
| Primary registry and trial identifying number | ChiCTR registry (Trial ID: ChiCTR2000040463)                                                                                                                                                                                                                                                                                                                                                                                                                                                                 |
| Date of registration in primary registry      | 28 November, 2020                                                                                                                                                                                                                                                                                                                                                                                                                                                                                            |
| Secondary identifying numbers                 | CFH2020-2-7121                                                                                                                                                                                                                                                                                                                                                                                                                                                                                               |
| Source(s) of monetary or material support     | Capital's Funds for Health Improvement and Research                                                                                                                                                                                                                                                                                                                                                                                                                                                          |
| Primary sponsor                               | Capital's Funds for Health Improvement and Research                                                                                                                                                                                                                                                                                                                                                                                                                                                          |
| Secondary sponsor(s)                          | NA                                                                                                                                                                                                                                                                                                                                                                                                                                                                                                           |
| Contact for public queries                    | Mutong Zhao, MD, MSc. [+86 18600116126r]<br>[muz880@mail.harvard.edu]<br>Lin Ma, MD, Department of Dermatology, Beijing Children's Hospital, Capital Medical University, National Center for Children's Health, Beijing, China. E-mail: bch_maleen@aliyun.com. Tel: +86 13601305676<br>Xiuhua Ma, MD, Department of Obstetrics and Gynecology, Beijing Daxing District People's Hospital, Capital Medical University Daxing Teaching Hospital, Beijing, China. E-mail: mxhdxqyy@126.com Tel: +86 13381021859 |
| Contact for scientific queries                | Preventive Antenatal Educational Program on Allergic Diseases (PAEPAD) for prevention of atopic dermatitis                                                                                                                                                                                                                                                                                                                                                                                                   |
| Public title                                  | Preventive Antenatal Educational Program on Allergic Diseases (PAEPAD) versus standard antenatal care for prevention of atopic dermatitis: study protocol for a single-center, investigator blinded randomized controlled trial.                                                                                                                                                                                                                                                                             |
| Scientific title                              |                                                                                                                                                                                                                                                                                                                                                                                                                                                                                                              |
| Countries of recruitment                      | China                                                                                                                                                                                                                                                                                                                                                                                                                                                                                                        |
| Health condition(s) or problem(s) studied     | Atopic dermatitis<br>PAEPAD group: <i>multi-disciplinary education of neonatal care</i>                                                                                                                                                                                                                                                                                                                                                                                                                      |
| Intervention(s)                               | Standard care group: standard education of neonatal care<br>Ages eligible for study: $\geq 18$ years<br>Sexes eligible for study: expecting mothers<br>Accepts healthy volunteers: no<br>Inclusion criteria: 1. Enlisted in the birth registry of Daxing Teaching Hospital of Capital Medical University and intend to give birth at this location; 2. Women aged $\geq 18$ ; 3. Less than 14+6 gestational week when recruited as measured by last menstrual period; 4. Residents of                        |
| Key inclusion and exclusion criteria          |                                                                                                                                                                                                                                                                                                                                                                                                                                                                                                              |

Daxing and intend to remain residing in Daxing for at least two years postpartum; 5. Written consent form.

Exclusion criteria: 1. Planned abortion; 2. Rare comorbidities of the mother that may cause miscarriage and congenital disabilities as determined by obstetricians, including but not limited to malignancies, congenital heart diseases, monogenetic diseases; 3. Recurrent miscarriage.

Interventional

Allocation: randomized

Intervention model: parallel assignment

Masking: investigator blind

Study type Primary purpose: prevention

Date of first enrolment 28 November, 2020

Target sample size 2266

Recruitment status Recruiting

Primary outcome(s) Cumulative incidence of atopic dermatitis at 2 years

Atopic dermatitis outcomes, atopic march outcomes, obstetric outcomes, neonatal outcomes, parental knowledge outcomes as detailed in the manuscripts

Ethics review Approved on 23 November, 2020 by the ethical committee of Capital Medical University Daxing Teaching Hospital, Beijing, China.

Completion date Last subject, last visit

Summary results NA

IPD sharing statement IPD will be shared with upon request (requests should be directed to muz880@mail.harvard.edu) for individual data meta-analyses (time frame: 1 year after publication. No end date.).

# BMJ Open

## Preventive Antenatal Educational Program on Allergic Diseases (PAEPAD) versus standard antenatal care for prevention of atopic dermatitis: study protocol for a single-center, investigator blinded randomized controlled trial.

|                                 |                                                                                                                                                                                                                                                                                                                                                                                                                                                                                                                                                                                                                                                                                                                                                                                                                                                                                                                                                                                                                                                                                                             |
|---------------------------------|-------------------------------------------------------------------------------------------------------------------------------------------------------------------------------------------------------------------------------------------------------------------------------------------------------------------------------------------------------------------------------------------------------------------------------------------------------------------------------------------------------------------------------------------------------------------------------------------------------------------------------------------------------------------------------------------------------------------------------------------------------------------------------------------------------------------------------------------------------------------------------------------------------------------------------------------------------------------------------------------------------------------------------------------------------------------------------------------------------------|
| Journal:                        | <i>BMJ Open</i>                                                                                                                                                                                                                                                                                                                                                                                                                                                                                                                                                                                                                                                                                                                                                                                                                                                                                                                                                                                                                                                                                             |
| Manuscript ID                   | bmjopen-2020-048083.R1                                                                                                                                                                                                                                                                                                                                                                                                                                                                                                                                                                                                                                                                                                                                                                                                                                                                                                                                                                                                                                                                                      |
| Article Type:                   | Protocol                                                                                                                                                                                                                                                                                                                                                                                                                                                                                                                                                                                                                                                                                                                                                                                                                                                                                                                                                                                                                                                                                                    |
| Date Submitted by the Author:   | 28-Aug-2021                                                                                                                                                                                                                                                                                                                                                                                                                                                                                                                                                                                                                                                                                                                                                                                                                                                                                                                                                                                                                                                                                                 |
| Complete List of Authors:       | zhao, mutong; Beijing Children's Hospital Capital Medical University, Dermatology<br>Liang, Yuan; Beijing Children's Hospital Capital Medical University, Dermatology<br>Song, Fengli; Capital Medical University Daxing Teaching Hospital<br>Ma, Lili; Capital Medical University Daxing Teaching Hospital<br>Wang, Ying; Capital Medical University Daxing Teaching Hospital<br>Gao, Wanli; Capital Medical University Daxing Teaching Hospital<br>Tian, Jing; Beijing Children's Hospital Capital Medical University, Dermatology<br>Ying, Xiangji; Peking University Cancer Hospital<br>Shen, Chunping; Beijing Children's Hospital Capital Medical University<br>Wang, Shan; Beijing Children's Hospital Capital Medical University<br>Jiao, Lei; Beijing Children's Hospital Capital Medical University<br>Wang, Yang; Beijing Children's Hospital Capital Medical University<br>Sun, Xiaoyan; Capital Medical University Daxing Teaching Hospital<br>Ma, Lin; Beijing Children's Hospital Capital Medical University, Dermatology<br>Ma, Xiuhua; Capital Medical University Daxing Teaching Hospital |
| <b>Primary Subject Heading</b>: | Dermatology                                                                                                                                                                                                                                                                                                                                                                                                                                                                                                                                                                                                                                                                                                                                                                                                                                                                                                                                                                                                                                                                                                 |
| Secondary Subject Heading:      | Dermatology                                                                                                                                                                                                                                                                                                                                                                                                                                                                                                                                                                                                                                                                                                                                                                                                                                                                                                                                                                                                                                                                                                 |
| Keywords:                       | Eczema < DERMATOLOGY, EPIDEMIOLOGY, PAEDIATRICS, Paediatric dermatology < PAEDIATRICS                                                                                                                                                                                                                                                                                                                                                                                                                                                                                                                                                                                                                                                                                                                                                                                                                                                                                                                                                                                                                       |
|                                 |                                                                                                                                                                                                                                                                                                                                                                                                                                                                                                                                                                                                                                                                                                                                                                                                                                                                                                                                                                                                                                                                                                             |

SCHOLARONE™  
Manuscripts

1  
2  
3 **1 TITLE PAGE**

4 **2 Preventive Antenatal Educational Program on Allergic Diseases (PAEPAD) versus**  
5 **3 standard antenatal care for prevention of atopic dermatitis: study protocol for a**  
6 **4 single-center, investigator-blinded randomized controlled trial.**

7 Mutong Zhao<sup>1</sup>, Yuan Liang<sup>1</sup>, Fengli Song<sup>2</sup>, Lili Ma<sup>2</sup>, Ying Wang<sup>2</sup>, Wanli Gao<sup>2</sup>, Jing  
8 Tian<sup>1</sup>, Xiangji Ying<sup>3</sup>, Chungping Shen<sup>1</sup>, Shan Wang<sup>1</sup>, Lei Jiao<sup>1</sup>, Yang Wang<sup>1</sup>, Xiaoyan  
9 Sun<sup>4</sup>, Lin Ma<sup>1</sup>, Xiuhua Ma<sup>2</sup>

10 1 Department of Dermatology, Beijing Children's Hospital, Capital Medical University,  
11 National Center for Children's Health, Beijing, China, 100045.

12 2 Department of Obstetrics and Gynecology, Beijing Daxing District People's Hospital-  
13 Capital Medical University Daxing Teaching Hospital, Beijing, China, 102600.

14 3 Gastrointestinal Cancer Center, Key Laboratory of Carcinogenesis and Translational  
15 Research (Ministry of Education), Peking University Cancer Hospital and Institute, Hai-  
16 dian District, Beijing, China, 100142

17 4 Department of Dermatology and Venerology, Beijing Daxing District People's  
18 Hospital-Capital Medical University Daxing Teaching Hospital, Beijing, China, 102600.

19 Correspondence to:

20 Lin Ma, MD, Department of Dermatology, Beijing Children's Hospital, Capital Medical  
21 University, National Center for Children's Health, Beijing, China. E-mail:

22 bch\_maleen@aliyun.com. Tel: +86 13601305676

23 Xiuhua Ma, MD, Department of Obstetrics and Gynecology, Beijing Daxing District  
24 People's Hospital, Capital Medical University Daxing Teaching Hospital, Beijing, China.

E-mail: mxhdxqyy@126.com Tel: +86 13381021859

Word count: 4407

## 25 **ABSTRACT**

### 26 **Introduction**

27 Patient education serves an essential purpose in the long-term management of allergic  
28 diseases as a secondary prevention approach. However, evidence on using education for  
29 primary prevention is limited. This study aims to evaluate the effect of an educational  
30 intervention, i.e., the Preventive Antenatal Education Program on Allergic Diseases  
31 (PAEPAD), on infantile allergic disease incidences compared with the standard care.

### 32 **Methods and analysis**

33 This is a single-center randomized controlled trial of expecting mother-children dyads in  
34 Daxing Teaching hospital of Beijing, China. A total of 2266 expecting mothers will be  
35 recruited. Expecting mothers enlisted in the birth registry of Daxing Teaching Hospital of  
36 Capital Medical University and intend to give birth at this location will be screened for  
37 eligibility. Women aged  $\geq 18$  with less than 14+6 weeks of pregnancy who intends to  
38 remain resident in Daxing district for at least two years postpartum will be entered into  
39 the run-in phase. Randomization will take place at 30 weeks of gestation. Women at high  
40 risk for miscarriage or intend to have abortions will be excluded. The participants will be  
41 allocated into two groups (i.e., the PAEPAD and the standard care group) by random  
42 allocation (1:1). The PAEPAD group will receive a multi-disciplinary education of  
43 neonatal care, including standard education as the control group and additional  
44 information on skincare of infants, sun protection, topical corticosteroids, and an  
45 overview of atopic dermatitis; whereas the standard care group will receive the standard  
46 neonatal care education carried out by obstetricians. Participants will be followed for two  
47 years. The primary outcome will be infantile atopic dermatitis (AD) cumulative incidence  
48 at two years post-partum. Secondary outcomes will include other AD outcomes, atopic  
49 march outcomes, knowledge outcomes, and other maternal and neonatal outcomes. Data  
50 collection will be carried out using both electronic and paper questionnaires. Biological  
51 samples will also be collected longitudinally.

### 52 **Ethics and dissemination**

53 The study design was approved by the ethical committee of Capital Medical University  
54 Daxing Teaching Hospital, Beijing, China. The trial results will be published in peer-  
55 reviewed journals and at conferences.

## 56 **Trial registration**

57 The trial is prospectively registered at the ChiCTR registry (Trial ID:  
58 ChiCTR2000040463).

## 59 **Strengths and limitations of the study**

- 60 • Large single-center investigator-blinded randomized controlled trial (RCT).
- 61 • First attempt to investigate education for primary prevention of incident cases  
62 of allergic diseases (atopic dermatitis for primary outcome).
- 63 • Prone to potential contamination due to single-center design and non-  
64 medication intervention.
- 65 • Potential heterogeneity of intervention effect due to variation in how the  
66 intervention will be carried out by individual educator albeit provision of  
67 formal training for educators.

## 68 **KEYWORDS**

69 Primary prevention, atopic dermatitis, atopic march, health education, antenatal  
70 education, pediatric, study protocol

## 71 **INTRODUCTION**

72 Atopic disorders place a substantial burden on both individuals and the health care  
73 system<sup>1-4</sup>. The sequential occurrence of AD, followed by one or more disorders  
74 characterized by allergen-specific type 2 (including TH2) responses are designated as  
75 atopic march<sup>5</sup>. The underlying mechanisms feature both a genetic susceptibility in which  
76 barrier dysfunction and immune dysregulation predispose atopic individuals to Th2  
77 immunity, and a progression in which AD and its pathological changes function as  
78 instigating events to subsequent development of other atopic comorbidities<sup>5 6</sup>. The human  
79 skin is a functional immune organ with an abundance of immunocompetent cells. In the  
80 resting state, an intact skin barrier and a balance of immune cell populations, cytokines,  
81 and chemokines promote immune tolerance, which is otherwise disrupted in AD patients.  
82 Barrier dysfunction from both loss-of-function mutations in filaggrin and the itch-scratch  
83 cycle was postulated as the driving component for atopic march programming by  
84 promoting Th2 and Th17 differentiation<sup>7-9</sup>. Subsequently, sensitizations to food allergens  
85 develop in the setting of Th2 skewing, which is otherwise Th1 skewed in the  
86 gastrointestinal-homing T cells in tolerant subjects<sup>10</sup>. Similarly, in asthmatic airways,

1  
2  
3 87 disrupted junctional adhesion, mucus plugging develops due to Th2 polarization. While  
4  
5 88 the severity of subsequent allergic airway inflammation was affected by AD, abrogation  
6  
7 89 of AD by topical treatment prevents worsening of subsequent airway inflammation by  
8  
9 90 counteracting the Th17 pathway<sup>11</sup>. Granted that both the genetic predisposition and the  
10  
11 91 atopic progression contribute to the development of atopic march, longitudinal studies are  
12  
13 92 warranted to explore the impact of immune activation of AD on the development of other  
14  
15 93 TH2 comorbidities. Meanwhile, the role of epithelial-immune crosstalk in the atopic  
16  
17 94 march needs to be further elucidated.

18  
19 95 To date, extensive research has been conducted on the therapeutic effect of barrier  
20  
21 96 enhancement using emollients. Compelling evidence indicated that emollients render the  
22  
23 97 skin less susceptible to irritants and reduce flares of AD (secondary prevention)<sup>12</sup> and  
24  
25 98 therefore was regarded as a cornerstone of AD therapy<sup>13</sup>. However, evidence was  
26  
27 99 inconsistent regarding the preventive effect of emollient application<sup>12 14-17</sup>. The  
28  
29 100 discordance from these behavioral intervention studies is probably a result of the  
30  
31 101 difference in when the outcome assessment took place. In the BEEP<sup>12</sup> and  
32  
33 102 PreventADALL<sup>14</sup> studies, the outcome was measured after a long washout period to  
34  
35 103 ensure that any mild AD would not be concealed by the on-going application of  
36  
37 104 emollients, whereas in the small studies<sup>15 16</sup> the immediate effect was evaluated.  
38  
39 105 However, the null long-term result should not overshadow the strong efficacy signal  
40  
41 106 displayed at the immediate outcome assessments. Moreover, as behavior change is a  
42  
43 107 process that unfolds through a continuum of stages from pre-contemplation,  
44  
45 108 contemplation, preparation, to action and maintenance, such straightforward behavioral  
46  
47 109 intervention may not echo with the real-world scenario (the stages of change model),  
48  
49 110 where behavior changes are achieved through health promotion initiatives, including  
50  
51 111 health education and health policies<sup>18 19</sup>. Consequently, the generalizability of these  
52  
53 112 studies might be affected due to the difference in how intervention was delivered and the  
54  
55 113 setting under which outcome assessment took place.

56  
57 114 In realizing the tremendous burden inflicted by atopic disorders and the critical role of  
58  
59 115 AD in atopic march, significant therapeutic discoveries have been made over the past  
60  
116 century. Nonetheless, in AD and other chronic diseases alike, adherence to treatment can  
117 be strikingly poor<sup>20</sup>. The underlying factors were postulated to be the complexity of

1  
2  
3 118 treatment regimen, corticosteroid phobia, and caregiver burden<sup>20</sup>. Addressing these  
4  
5 119 issues calls for consistent efforts in patient education that can hardly be accomplished in a  
6  
7 120 typical clinical visit. Recent studies have shown that structured patient education can  
8  
9 121 significantly reduce disease severity in AD patients<sup>21</sup>. Given this, guidelines for AD have  
10  
11 122 acknowledged education of patients and caregivers as an essential form of secondary  
12  
13 123 prevention to reduce disease flares and improve quality of lives<sup>22</sup>. However, little is  
14  
15 124 known about how education performs as a primary prevention approach to reduce AD  
16  
17 125 disease burden.

17 126 Antenatal education is a crucial component of antenatal care. Since its implementation  
18  
19 127 from the nineteenth century, mortality in children has decreased tremendously. In 2005,  
20  
21 128 the World Health Organization called for “realizing the Potential of Antenatal Care”<sup>23</sup>,  
22  
23 129 and thence started using it as a platform for primary prevention of malnutrition,  
24  
25 130 HIV/AIDS, sexually transmitted infections, tuberculosis, and prevention of postpartum  
26  
27 131 and neonatal diseases<sup>24-26</sup>. Its diversified usage has led us to hypothesize that educational  
28  
29 132 intervention delivered through the antenatal education platform may yield informative  
30  
31 133 data for assessing the primary prevention of allergic diseases. Thus, the Preventive  
32  
33 134 Antenatal Education Program on Allergic Diseases (PAEPAD) study focuses on using  
34  
35 135 the antenatal care platform as a more affordable and effective health education approach.  
36  
37 136 In this investigator-blinded, randomized controlled trial, we aim to evaluate the effect of  
38  
39 137 such intervention vs. standard education on atopic disease outcomes. The primary  
40  
41 138 objective is to evaluate the preventive effect of PAEPAD on atopic dermatitis and atopic  
42  
43 139 comorbidity incidences. The secondary objectives are: 1) to explore the immune-barrier  
44  
45 140 crosstalk between the immune system, commensal flora and skin barrier function that  
46  
47 141 may explain the development of atopic march; 2) to identify biomarkers (metabolites,  
48  
49 142 MicroRNAs) that can be used to characterize individuals at high risk of AD and atopic  
50  
51 143 march; 3) to elucidate whether and to what extent the maternal immune milieu influences  
52  
53 144 pediatric AD development through cord blood and breast milk.

## 50 145 **METHODS AND ANALYSIS**

### 51 146 **Study design**

53 147 The study is a prospective investigator-blinded randomized controlled trial with two arms  
54  
55 148 (PAEPAD vs. standard antenatal education). All expectant mothers planning to give birth



1  
2  
3 149 at the Daxing Teaching Hospital of Capital Medical University will be invited to  
4  
5 150 participate. Daxing Teaching Hospital of Capital Medical University is a general hospital  
6  
7 151 located in Daxing district of Beijing, China, with more than 6,000 deliveries annually.  
8  
9 152 Daxing district makes up approximately 6.3% of Beijing geographically. Daxing  
10  
11 153 Teaching Hospital of Capital Medical University makes up approximately 2.7% of  
12  
13 154 Beijing's annual deliveries. This protocol was drafted (Aug 17<sup>th</sup>, 2020) before participant  
14  
15 155 recruitment (Oct 30<sup>th</sup>, 2020).

#### 156 **RECRUITMENT, INCLUSION AND EXCLUSION CRITERIA**

157 All expectant parents living in the catchment area of the Daxing Teaching Hospital of  
158 Capital Medical University will receive an information leaflet about the study at their  
159 first visit to the maternity clinic. Recruitment will take place in their first mandatory  
160 maternity class between gestation week 7 to 14+6. All expectant mothers will be given  
161 detailed information about the study. A trained research nurse will outline key  
162 information (i.e., inclusion and exclusion criteria, scheduled research visits, and  
163 instructions on biological sample collection) about the study in the form of a short lecture  
164 session. The parents who wish to participate will be requested to provide written  
165 informed consent. They will be inquired on five levels of consent: 1) consent to  
166 participate in the study; 2) consent to biological sample collections of the mother that are  
167 non-invasive, including but not limited to the recollection of blood from routine  
168 pregnancy workups; 3) consent to biological sample collections of the mother that are  
169 minimally invasive or could potentially cause discomfort, i.e., additional blood draw and  
170 vaginal swabs; 4) consent to biological sample collections of the child that are non-  
171 invasive, including but not limited to the recollection of blood from routine checkups; 5)  
172 consent to biological sample collections of the child that are minimally invasive or could  
173 potentially cause discomfort, i.e., additional blood draw and tape stripping. At birth,  
174 another consent form on the children's biological sample collection will be signed to  
175 allow for any change of consent status on non-invasive and minimally invasive sample  
176 collections. Consented participants will subsequently receive a QR code through their  
177 cellphone after registration. By scanning the QR code, the recruitment staff will be able  
178 to confirm their participation status, at the end of which a study-specific ID number will  
179 be generated automatically.

1  
2  
3 **180 Inclusion and exclusion criteria**

4  
5 181 Run-in phase inclusion criteria: 1. Enlisted in the birth registry of Daxing Teaching  
6  
7 182 Hospital of Capital Medical University and intend to give birth at this location; 2.  
8  
9 183 Women aged  $\geq 18$ ; 3. Less than 14+6 gestational week when recruited as measured by last  
10  
11 184 menstrual period; 4. Residents of Daxing and intend to remain residing in Daxing for at  
12  
13 185 least two years postpartum; 5. Written consent form.

14 186 Randomization phase inclusion criteria:

15 187 Pregnant women enlisted in the birth registry of Daxing Teaching Hospital of Capital  
16  
17 188 Medical University and intend to give birth at this location; passes the run-in phase  
18  
19 189 criteria.

20 190 Withdrawal criteria: 1. Still birth; 2. Abortion (spontaneous or induced); 3. Rare  
21  
22 191 comorbidities that present after inclusion into the study that may render the participant  
23  
24 192 unsuitable for participation, including but not limited to malignancies, amniotic fluid  
25  
26 193 embolism, eclampsia, and major birth abnormalities of the child.

27 194 Exclusion criteria: 1. Planned abortion; 2. Rare comorbidities of the mother that may  
28  
29 195 cause miscarriage and congenital disabilities as determined by OBs, including but not  
30  
31 196 limited to malignancies, congenital heart diseases, monogenetic diseases; 3. Recurrent  
32  
33 197 miscarriage; 4. Mental, psychological or intellectual disabilities of either one of the  
34  
35 198 expecting parents.

36 199 **Treatment allocation**

37  
38 200 The study flow is as follows (Fig. 1): Participants will be randomly assigned to one of the  
39  
40 201 two arms (i.e., PAEPAD vs. standard antenatal care). Randomization will be conducted  
41  
42 202 by an epidemiologist using a computer-generated list with the number of groups being 2  
43  
44 203 and the distribution ratio of the two groups being 1:1. The list will be generated using  
45  
46 204 block randomization with block sizes hidden from all investigators. Group allocation will  
47  
48 205 be placed in sealed opaque envelopes, labeled by numbers only. The envelopes will be  
49  
50 206 opened in consecutive order. Participants will then be informed about their allocated  
51  
52 207 groups by a research nurse.

53 208 **Blinding**

54 209 This is a researcher-blinded study. Treatment allocation will be performed by an  
55  
56 210 epidemiologist, and the researchers who evaluate the outcome matrices and analyze data

1  
2  
3 211 will be blinded and work independently from the group of clinicians who will carry out  
4 212 the intervention. Data entry will be undertaken by trial administrators blinded to group  
5 213 allocation.  
6  
7

8 214 **Intervention**

9  
10 215 After randomization at GW 30, the participants will be informed on their allocation, and  
11 216 members of the research team will send out weekly invitations through messages to  
12 217 participants who have not yet completed the intervention. For those who failed to  
13 218 complete the intervention prior to admission into the OB department, a pre-recorded  
14 219 video will be played during their hospital stay. In the standard care group, patients will  
15 220 receive the standard neonatal care session from an experienced obstetrician, which will  
16 221 include breastfeeding, newborn screening tests, infant physiology, immunization, solid  
17 222 food introduction, belly and eye care (45 min). This session is one of the five mandatory  
18 223 sessions with participation of 83.7-91.9% over the past five years (unpublished data). The  
19 224 treatment group will receive an educational program designed by a multi-disciplinary  
20 225 group of experienced obstetricians and pediatric dermatologists. The program will be  
21 226 focused on neonatal care as the control group (45 min) and 1) Skin care of the newborns  
22 227 with a practical demonstration on bathing and emollient application (20 min); 2) Sun  
23 228 protection (3 min); 3) A brief introduction on commonly used topical agents during  
24 229 infancy, including topical corticosteroids, antibiotics, and astringents (5 min); 4) Besides,  
25 230 the program will also contain a 5 minutes presentation on atopic dermatitis disease  
26 231 burden, its precipitators, managements, disease courses, and the atopic march. Specific  
27 232 recommendations are listed in the supplementary table S1. At the neonatal care class, all  
28 233 participants will first receive the standard education, which will be held nonconcurrently  
29 234 to minimize group contamination. Online courses will be held whenever gathering are  
30 235 restricted due to the COVID-19 pandemic. At the end of the sessions, participants of the  
31 236 PAEPAD cohort will be asked to participate in the PAEPAD session, which will last for  
32 237 less than 40 min. Participants of the standard neonatal care cohort will be asked to leave.  
33 238 The intervention will be entirely educational, no cleanser or emollient product will be  
34 239 provided or recommended. At follow-up visits, no further education will be implemented.  
35 240 Any crossover and non-compliance will be surveyed by a research nurse at the beginning  
36  
37  
38  
39  
40  
41  
42  
43  
44  
45  
46  
47  
48  
49  
50  
51  
52  
53  
54  
55  
56  
57  
58  
59  
60

241 and end of the antenatal sessions. The research nurses who collect data on compliance  
242 and who send out invitations will not be involved in outcome assessment.

### 243 **Study outcomes and follow-up**

#### 244 Study outcomes

245 All outcome measures are summarized in Table 1. There will be both fixed and disease  
246 prompted postnatal follow-up visits during which outcome assessments will take place.  
247 Diagnostic criteria for AD will be based on Hanifin&Rajka criteria, which is regarded as  
248 the ‘gold standard’ for hospital-based research. The Infants’ Dermatitis Quality of Life  
249 Index (IDQoL) is a questionnaire of ten items that has been translated into 21 languages.  
250 This questionnaire is validated in infants aged 0–3 years<sup>27</sup>. Disease severity at disease  
251 flares will be measured by SCORing of Atopic Dermatitis (SCORAD) and Eczema Area  
252 and Severity Index (EASI) and through the course of the disease by Investigator’s Global  
253 Assessment (IGA). SCORAD and EASI are validated instruments for disease severity  
254 assessment<sup>28</sup>. IGA provides the most straightforward assessment of disease severity and  
255 will thus be employed to assess AD disease-free days. An IGA of less than two is defined  
256 as clearance of disease. An episode of expiratory wheezing will be defined as bronchial  
257 obstruction lasting for at least 24 hours preceded by at least a one-week non-wheezing  
258 healthy period, as defined by a physician. Recurrent wheezing will be defined as the  
259 occurrence of 3 or more episodes of expiratory wheezing diagnosed by a physician in a  
260 12-month period<sup>29</sup>. Rhinitis will be defined as symptoms of sneezing, a runny or blocked  
261 nose, or itchy, red and watery eyes after exposure to furred pets or pollen the year before  
262 follow-up and/or doctor’s diagnosis of allergic rhinitis<sup>30</sup>. Sensitization will be defined as  
263 allergen-specific IgE  $\geq 0.35$  kUA/l. Parental knowledge and attitude will be quantified  
264 using a questionnaire. The items of the questionnaire were developed following rigorous  
265 procedures, including a review of literature, a patient focus group and a panel discussion  
266 of experts. This questionnaire is currently under validation (unpublished data).

#### 267 Follow-up

268 Participants will receive both fixed and disease prompted follow-up visits. Follow-up  
269 visits will be carried out at Daxing hospital and five health service centers during  
270 immunization. At follow-ups, biological samples, surveys and physical examination data  
271 will be collected. Specific items are listed in Table. 2. In addition, children will be

1  
2  
3 272 assessed upon disease onsets and flares. During follow-ups, all cases will be treated  
4 273 according to the guidelines<sup>2 13 31-34</sup> by specialists who are actively engaged in the care of  
5 274 pediatric AD patients. Participants are not allowed to participate in other clinical trials  
6 275 after inclusion into the study till the end of the last follow-up visit

### 276 **Covariates**

277 Relevant covariates will include age, sex, social-economic status, familial history of  
278 allergic diseases, administration of systemic medication and nutrient supplements,  
279 maternal psychological status measured with Kessler-10 prenatally. Other variables,  
280 including the Edinburgh postnatal depression scale (EPDS), maternal comorbidities  
281 during pregnancy, postnatal nutrition status and indicators for feeding practices (i.e.,  
282 minimum dietary diversity, the introduction of solid, semi-solid or soft foods, duration of  
283 breastfeeding) will also be collected.

### 284 **Data collection and management**

285 Data collection at fixed time points will be conducted with an electronic database  
286 designed specifically for this project. At each visit, patients will be asked to present a  
287 patient-specific QR code, by scanning which two different questionnaires will be  
288 delivered to the participants and a research nurse separately. Less than 15 items will be  
289 surveyed in a standard questionnaire for the patient to minimize respondent fatigue  
290 caused by lengthy questionnaires. The rest of the relevant data will be collected by the  
291 research nurses during a face-to-face interview. Routine lab workups will be collected  
292 from the participants' medical records. Data will be checked by the members of the  
293 research team, and incorrect or missing questions will be sent back to the participants. All  
294 data recorded in this electronic database will be accessible only by the team members.  
295 Participants will receive text reminders prior to each follow-up visit and will be  
296 interviewed through phone calls for incomplete visits. Data collection at disease onsets  
297 and flares will be carried out with paper surveys, which will be encrypted and kept  
298 accessible only by team members with authorization. Group allocation data are accessible  
299 through unique identifiers on a separate sheet by only the principal investigators. All data  
300 handling (data entry, storage, and analysis) will be confidential. The principal  
301 investigators are responsible for ensuring data quality.

## 302 **Biological sample collection**

303 At each time point, biological samples from mothers and children (where applies) will be  
304 collected and stored (Table 2). These samples include maternal blood, urine, feces, skin,  
305 vaginal and oral swabs, breast milk, placenta, cord blood, meconium, and blood, feces,  
306 skin, nasopharyngeal and external auditory canal swabs, tape stripping of skin lipids from  
307 the children. Procedures are detailed in the supplementary material.

## 308 **Sample size**

309 The PAEPAD study will be based on a sample of 2266 expecting mothers. We calculated  
310 that assuming 20%<sup>35</sup> AD rate, 20% lost to follow up (LTFU), with a clinically significant  
311 estimate of a cumulative incidence ratio of 0.75, 80% power and two-sided 5%  
312 significance level, the estimated sample size of the primary outcome would be 2266. The  
313 cutoff value of clinical significance of such educational intervention was derived by a  
314 survey of expert opinion (n=7, unpublished data) and from previous RCTs with  
315 behavioral interventions<sup>15 17</sup>.

## 316 **Analyses**

317 Definition of population sets

- 318 1) Primary analysis population: The Modified Intent-to-treat Population (MITTP),  
319 which will comprise of expectant women who undergo randomization, with data of at  
320 least one post-intervention follow-up.
- 321 2) Per-protocol Population (PPP): All expectant women complying with the study  
322 protocol, with data of at least one post-intervention follow-up.
- 323 3) As treated population: All randomized participants who received the intervention  
324 (whether complied or not) , with data of at least one post-intervention follow-up.

325 Statistical analysis

326 Statistical analyses will be performed using STATA 14.0, R 1.0.44 and SAS9.2 statistical  
327 software.

328 The primary analysis will be based on the MITT population. Sensitivity analyses will be  
329 done with both the PP population and the as-treated population. For primary analyses, we  
330 will use  $\chi^2$  tests to compare categorical outcomes. For continuous variables, normally  
331 distributed continuous variables will be compared using the t-test, and the Wilcoxon  
332 rank-sum test will be used for skewed variables. For time to event data, e.g., time to first

1  
2  
3 333 AD episode and time to the first topical corticosteroid exposure, will be calculated using  
4 334 the Kaplan-Meier method. The HRs comparing PAEPAD and standard care will be  
5 335 estimated using cox regression model. Multiple imputation will be conducted if loss to  
6 336 follow-up exceeds 30%. Subgroup analysis will be done for the relative risk of AD,  
7 337 asthma, rhinitis and food sensitization stratified by familial history of atopic disorders,  
8 338 and AD severity for allergic comorbidities (whenever applies). Regression models with  
9 339 interaction terms will be used to test for statistical significance among subgroups.  
10 340 For sensitivity analysis that shall be done with the PP population, the analyses above will  
11 341 be conducted. For the sensitivity analysis that shall be done with the secondary analysis  
12 342 population, both traditional multivariate comparison and propensity score matching will  
13 343 be used to better balance the covariates and identify comparable groups. An additional  
14 344 sensitivity analysis will be conducted on the population that receives in-person education  
15 345 (as opposed to video recorded).

#### 346 **Data monitoring**

347 An epidemiologist who is independent of the research team will be tasked to monitor the  
348 data. An interim analysis on knowledge will be performed when 50% of the patients  
349 complete the one-year follow-up. The aim of this interim analysis is to give a better sense  
350 if the final primary outcome of incidence will be different between groups, as it is  
351 indicated by the stages of change model that knowledge change may lead to behavioral  
352 change.

#### 353 **Patient and public involvement**

354 No patient was involved with study design, recruitment or conduct.

#### 355 **Ethics and dissemination**

356 The PAEPAD study is approved by the ethics committee of Capital Medical University  
357 Daxing Teaching Hospital. Written informed consent will be obtained from all  
358 participants. This study is registered at the Chinese Clinical Trial Registry under the  
359 identifier ChiCTR2000040463. Participation in the project is voluntary and will not  
360 impact the medical care of the women regardless of their participation status throughout  
361 pregnancy. All participants have the right to withdraw from the study at any point and  
362 have their data removed from the study database. All patient data will be securely stored  
363 and kept accessible by the research members only, with previous authorization from the

1  
2  
3 364 PI. The results will be disseminated through peer-reviewed journals. Results will also be  
4  
5 365 communicated at scientific conferences.

6  
7 366 **DISCUSSION**

8 367 PAEPAD study is a large single-center randomized controlled trial of an antenatal  
9  
10 368 educational intervention for prevention of atopic dermatitis and the atopic march.  
11  
12 369 Previous studies on educational interventions have been therapeutic, aiming at reducing  
13  
14 370 symptoms and improving quality of life. Therapeutic patient education (secondary  
15  
16 371 prevention) in AD has been proved to be effective with a significant reduction in disease  
17  
18 372 severity<sup>21</sup>. However, little is known about the primary preventive effect of educational  
19  
20 373 and lifestyle interventions.

21 374 A strength of this study is the large sample size. In a similar study that aims to evaluate  
22  
23 375 the effect of prenatal education on knowledge and behavioral changes for allergic disease  
24  
25 376 prevention, the sample size was determined based on the behavioral matrices, resulting in  
26  
27 377 a total sample size of 120<sup>36</sup>. As behavioral changes do not necessarily modify disease  
28  
29 378 outcomes, a larger sample size is warranted to provide adequate power to detect disease  
30  
31 379 outcome differences. Another strength is that we chose the topics of the PAEPAD  
32  
33 380 sessions based on both experts' opinion and a previous survey (Supplementary material,  
34  
35 381 table S2), which indicated that new mothers needed help on infant skin care, safe practice  
36  
37 382 of sun protection and building an unbiased understanding on common topical drugs,  
38  
39 383 especially corticosteroids. We did not discuss about the treatment of atopic diseases  
40  
41 384 further than emphasizing the importance of following the guideline-oriented instructions  
42  
43 385 of physicians<sup>2 13 31-34</sup> at this lecture. Recent pilot studies provided strong efficacy signals  
44  
45 386 for the hypothesis that daily emollient use could prevent atopic dermatitis<sup>15 17</sup>. While the  
46  
47 387 subsequent large trials yielded null results<sup>12 14</sup>, it's crucial to realize that the hypotheses in  
48  
49 388 these trials differ significantly. In the pilot studies, emollients were continued until the  
50  
51 389 outcome assessment, whereas in the larger pragmatic trials, a washout period was  
52  
53 390 implemented. In the Barrier Enhancement for Eczema Prevention (BEEP) study, the rates  
54  
55 391 of continued emollient and wash product use extended beyond the intervention period  
56  
57 392 until outcome assessment were as low as four and five percent for the intervention and  
58  
59 393 the control group respectively<sup>12</sup>. Thus, the pilot studies assessed the immediate  
60 394 preventive effect, whereas the larger studies assessed whether this effect, if there is any,



1  
2  
3 395 is sustainable. While it's reasonable to hypothesize that the protective effect of emollients  
4 396 may not sustain beyond a year after refraining from application, incorporating conceptual  
5 397 and behavioral changes into daily skincare routine can be substantially beneficial for  
6  
7 398 short term preventive effects.

8  
9  
10 399 The current study will explore the preventive effect of an educational intervention, which  
11  
12 400 bears a closer resemblance to the real world scenario through which behavioral changes  
13  
14 401 are achieved. In addition, we plan to longitudinally collect biological specimens to study  
15  
16 402 the crosstalk of lifestyle changes and molecular biology.

17 403 The study has some limitations. First, this study is subject to contamination due to the  
18  
19 404 nature of a non-medication intervention and the single-center design. Consequently, the  
20  
21 405 effect size to be detected will likely be a more conservative estimation of the real  
22  
23 406 preventive effect. Therefore, we plan to collect cross-over data and conduct sensitivity  
24  
25 407 analyses based on the PP population. Second, although the PAEPAD lectures will be led  
26  
27 408 by experienced obstetricians and dermatologists, the heterogeneity may nonetheless  
28  
29 409 constitute potential bias. We aim to reduce the heterogeneity by providing a training  
30  
31 410 session and mock classrooms before the project launching during which lecturers will be  
32  
33 411 evaluated on the organization of the class, clarity, student engagement and consistency of  
34  
35 412 performance.

36 413 In conclusion, the PAEPAD study will add to our knowledge of the preventive effect of  
37  
38 414 antenatal education on allergic disease outcomes and identify cellular and molecular  
39  
40 415 changes that will warrant future studies. We expect that results from the PAEPAD study  
41  
42 416 will expand our understanding of the primary prevention of allergic disorders.

#### 417 **AUTHORS' CONTRIBUTIONS**

43 418 Lin Ma and Xiuhua Ma are the principal investigators of this trial and conceptualized the  
44  
45 419 trial. Mutong Zhao, Yuan Liang, Jing Tian, Fengli Song, Ying Wang Lili Ma, Ying  
46  
47 420 Wang, Wanli Gao are responsible for the execution of the project. Mutong Zhao has  
48  
49 421 written the protocol manuscript. Chunping Shen, Shan Wang, Lei Jiao, Yang Wang,  
50  
51 422 Xiaoyan Sun are responsible for data registration. Mutong Zhao and Xiangji Ying will  
52  
53 423 carry out data analyses once the trial is completed. All authors critically reviewed the  
54  
55 424 article. All the authors approved the final manuscript.

56 425 Authorship eligibility

1  
2  
3 426 Authorship of the consequent publication of this project will be granted to those who  
4  
5 427 made a significant contribution to the conception, design, implementation, analysis of the  
6  
7 428 data, or those who drafted the work or reviewed/revised it critically for important  
8  
9 429 intellectual content.

10 430 Availability of data and materials

11 431 The datasets to be analyzed will be available from the corresponding author upon  
12  
13 432 reasonable request (requests should be directed to muz880@mail.harvard.edu).

### 14 433 **FUNDING**

15  
16  
17 434 This study has received a public grant from the Capital's Funds for Health Improvement  
18  
19 435 and Research (CFH2020-2-7121). The funders had no role in the design of this study and  
20  
21 436 will not have any role during its execution, analyses, interpretation of data, or submission  
22  
23 437 of outcomes.

### 24 438 **COMPETING INTERESTS**

25 439 None declared.

26 440

27 441

28 442

## 29 443 **References**

30 444

- 31 445 1. Muraro A, Halken S, Arshad SH, et al. EAACI food allergy and anaphylaxis guidelines.  
32 446 Primary prevention of food allergy. *Allergy* 2014;69(5):590-601. doi:  
33 447 10.1111/all.12398  
34 448 2. Wollenberg A, Barbarot S, Bieber T, et al. Consensus-based European guidelines for  
35 449 treatment of atopic eczema (atopic dermatitis) in adults and children: part I.  
36 450 *Journal of the European Academy of Dermatology and Venereology : JEADV*  
37 451 2018;32(5):657-82. doi: 10.1111/jdv.14891  
38 452 3. Bousquet J, Schunemann HJ, Fonseca J, et al. MACVIA-ARIA Sentinel Network for  
39 453 allergic rhinitis (MASK-rhinitis): the new generation guideline  
40 454 implementation. *Allergy* 2015;70(11):1372-92. doi: 10.1111/all.12686  
41 455 4. Sasaki M, Koplin JJ, Dharmage SC, et al. Prevalence of clinic-defined food allergy in  
42 456 early adolescence: The SchoolNuts study. *The Journal of allergy and clinical*  
43 457 *immunology* 2018;141(1):391-98 e4. doi: 10.1016/j.jaci.2017.05.041  
44 458 5. Paller AS, Spergel JM, Mina-Osorio P, et al. The atopic march and atopic  
45 459 multimorbidity: Many trajectories, many pathways. *The Journal of allergy and*  
46 460 *clinical immunology* 2019;143(1):46-55. doi: 10.1016/j.jaci.2018.11.006  
47 461 6. Liang Y, Chang C, Lu Q. The Genetics and Epigenetics of Atopic Dermatitis-Filaggrin  
48 462 and Other Polymorphisms. *Clin Rev Allergy Immunol* 2016;51(3):315-28. doi:  
49 463 10.1007/s12016-015-8508-5 [published Online First: 2015/09/20]  
50  
51  
52  
53  
54  
55  
56  
57  
58  
59  
60

- 1  
2  
3 464 of food allergy and food tolerance. *The Journal of allergy and clinical*  
4 465 *immunology* 2016;137(4):984-97. doi: 10.1016/j.jaci.2016.02.004 [published  
5 466 Online First: 2016/04/10]
- 7 467 8. Shimura S, Takai T, Iida H, et al. Epicutaneous Allergic Sensitization by Cooperation  
8 468 between Allergen Protease Activity and Mechanical Skin Barrier Damage in  
9 469 Mice. *The Journal of investigative dermatology* 2016;136(7):1408-17. doi:  
10 470 10.1016/j.jid.2016.02.810 [published Online First: 2016/03/19]
- 11 471 9. Guttman-Yassky E, Zhou L, Krueger JG. The skin as an immune organ: Tolerance  
12 472 versus effector responses and applications to food allergy and  
13 473 hypersensitivity reactions. *The Journal of allergy and clinical immunology*  
14 474 2019;144(2):362-74. doi: 10.1016/j.jaci.2019.03.021 [published Online First:  
15 475 2019/04/08]
- 17 476 10. Chan SM, Turcanu V, Stephens AC, et al. Cutaneous lymphocyte antigen and  
18 477 alpha4beta7 T-lymphocyte responses are associated with peanut allergy and  
19 478 tolerance in children. *Allergy* 2012;67(3):336-42. doi: 10.1111/j.1398-  
20 479 9995.2011.02765.x [published Online First: 2012/03/17]
- 22 480 11. Deckers J, Bougarne N, Mylka V, et al. Co-Activation of Glucocorticoid Receptor  
23 481 and Peroxisome Proliferator-Activated Receptor-gamma in Murine Skin  
24 482 Prevents Worsening of Atopic March. *The Journal of investigative dermatology*  
25 483 2018;138(6):1360-70. doi: 10.1016/j.jid.2017.12.023
- 27 484 12. Chalmers JR, Haines RH, Bradshaw LE, et al. Daily emollient during infancy for  
28 485 prevention of eczema: the BEEP randomised controlled trial. *Lancet*  
29 486 2020;395(10228):962-72. doi: 10.1016/S0140-6736(19)32984-8 [published  
30 487 Online First: 2020/02/23]
- 31 488 13. Eichenfield LF, Tom WL, Berger TG, et al. Guidelines of care for the management  
32 489 of atopic dermatitis: section 2. Management and treatment of atopic dermatitis  
33 490 with topical therapies. *Journal of the American Academy of Dermatology*  
34 491 2014;71(1):116-32. doi: 10.1016/j.jaad.2014.03.023 [published Online First:  
35 492 2014/05/13]
- 37 493 14. Skjerven HO, Rehbinder EM, Vettukattil R, et al. Skin emollient and early  
38 494 complementary feeding to prevent infant atopic dermatitis (PreventADALL):  
39 495 a factorial, multicentre, cluster-randomised trial. *Lancet*  
40 496 2020;395(10228):951-61. doi: 10.1016/S0140-6736(19)32983-6 [published  
41 497 Online First: 2020/02/23]
- 43 498 15. Horimukai K, Morita K, Narita M, et al. Application of moisturizer to neonates  
44 499 prevents development of atopic dermatitis. *The Journal of allergy and clinical*  
45 500 *immunology* 2014;134(4):824-30 e6. doi: 10.1016/j.jaci.2014.07.060
- 47 501 16. McClanahan D, Wong A, Kezic S, et al. A randomized controlled trial of an emollient  
48 502 with ceramide and filaggrin-associated amino acids for the primary  
49 503 prevention of atopic dermatitis in high-risk infants. *Journal of the European*  
50 504 *Academy of Dermatology and Venereology : JEADV* 2019;33(11):2087-94. doi:  
51 505 10.1111/jdv.15786 [published Online First: 2019/07/10]
- 53 506 17. Simpson EL, Chalmers JR, Hanifin JM, et al. Emollient enhancement of the skin  
54 507 barrier from birth offers effective atopic dermatitis prevention. *The Journal of*  
55 508 *allergy and clinical immunology* 2014;134(4):818-23. doi:  
56 509 10.1016/j.jaci.2014.08.005

18. Health behavior and health education: Theory, research, and practice, 4th ed. San Francisco, CA, US: Jossey-Bass 2008.
19. World Health Organization ROftEM. Health education: theoretical concepts, effective strategies and core competencies: a foundation document to guide capacity development of health educators, 2012.
20. Tan X, Feldman SR, Chang J, et al. Topical drug delivery systems in dermatology: a review of patient adherence issues. *Expert opinion on drug delivery* 2012;9(10):1263-71. doi: 10.1517/17425247.2012.711756
21. Zhao M, Liang Y, Shen C, et al. Patient Education Programs in Pediatric Atopic Dermatitis: A Systematic Review of Randomized Controlled Trials and Meta-Analysis. *Dermatol Ther (Heidelb)* 2020;10(3):449-64. doi: 10.1007/s13555-020-00365-z [published Online First: 2020/03/23]
22. Sidbury R, Tom WL, Bergman JN, et al. Guidelines of care for the management of atopic dermatitis: Section 4. Prevention of disease flares and use of adjunctive therapies and approaches. *Journal of the American Academy of Dermatology* 2014;71(6):1218-33. doi: 10.1016/j.jaad.2014.08.038
23. Al-Ateeq MA, Al-Rusaiees AA. Health education during antenatal care: the need for more. *International journal of women's health* 2015;7:239-42. doi: 10.2147/IJWH.S75164
24. Parat S, Negre V, Baptiste A, et al. Prenatal education of overweight or obese pregnant women to prevent childhood overweight (the ETOIG study): an open-label, randomized controlled trial. *International journal of obesity* 2019;43(2):362-73. doi: 10.1038/s41366-018-0205-z
25. Suto M, Takehara K, Yamane Y, et al. Effects of prenatal childbirth education for partners of pregnant women on paternal postnatal mental health and couple relationship: A systematic review. *J Affect Disord* 2017;210:115-21. doi: 10.1016/j.jad.2016.12.025 [published Online First: 2016/12/27]
26. Nnam NM. Improving maternal nutrition for better pregnancy outcomes. *Proc Nutr Soc* 2015;74(4):454-9. doi: 10.1017/S0029665115002396 [published Online First: 2015/08/13]
27. Basra MK, Gada V, Ungaro S, et al. Infants' Dermatitis Quality of Life Index: a decade of experience of validation and clinical application. *The British journal of dermatology* 2013;169(4):760-8. doi: 10.1111/bjd.12563 [published Online First: 2013/08/06]
28. Eichenfield LF, Tom WL, Chamlin SL, et al. Guidelines of care for the management of atopic dermatitis: section 1. Diagnosis and assessment of atopic dermatitis. *Journal of the American Academy of Dermatology* 2014;70(2):338-51. doi: 10.1016/j.jaad.2013.10.010 [published Online First: 2013/12/03]
29. Mochizuki H, Kusuda S, Okada K, et al. Palivizumab Prophylaxis in Preterm Infants and Subsequent Recurrent Wheezing. Six-Year Follow-up Study. *Am J Respir Crit Care Med* 2017;196(1):29-38. doi: 10.1164/rccm.201609-1812OC [published Online First: 2017/02/06]
30. Ballardini N, Bergstrom A, Wahlgren CF, et al. IgE antibodies in relation to prevalence and multimorbidity of eczema, asthma, and rhinitis from birth to adolescence. *Allergy* 2016;71(3):342-9. doi: 10.1111/all.12798 [published Online First: 2015/10/28]

- 1  
2  
3 556 31. Wang H, Ma L, Tan Q, et al. Chinese Expert Consensus on the Diagnosis and  
4 557 Management of Food Allergy in Children With Atopic Dermatitis#. *Allergol Int* 2020;3(3):135-41. doi: 10.1097/jd9.0000000000000091  
5 558  
6 559 32. Okubo K, Kurono Y, Ichimura K, et al. Japanese guidelines for allergic rhinitis 2017.  
7 560 *Allergol Int* 2017;66(2):205-19. doi: 10.1016/j.alit.2016.11.001 [published  
8 561 Online First: 2017/02/19]  
9 562 33. Scadding GK, Kariyawasam HH, Scadding G, et al. BSACI guideline for the diagnosis  
10 563 and management of allergic and non-allergic rhinitis (Revised Edition 2017;  
11 564 First edition 2007). *Clin Exp Allergy* 2017;47(7):856-89. doi:  
12 565 10.1111/cea.12953 [published Online First: 2017/07/01]  
13 566 34. Arakawa H, Hamasaki Y, Kohno Y, et al. Japanese guidelines for childhood asthma  
14 567 2017. *Allergol Int* 2017;66(2):190-204. doi: 10.1016/j.alit.2016.11.003  
15 568 [published Online First: 2017/01/22]  
16 569 35. Guo Y, Li P, Tang J, et al. Prevalence of Atopic Dermatitis in Chinese Children aged  
17 570 1-7 ys. *Scientific reports* 2016;6:29751. doi: 10.1038/srep29751  
18 571 36. Nakamura R, Ishiguro N, Naru E, et al. The effect of an educational program for  
19 572 pregnant women to prevent allergic diseases in infants: study protocol for a  
20 573 randomized controlled trial. *Trials* 2019;20(1):755. doi: 10.1186/s13063-  
21 574 019-3797-2 [published Online First: 2019/12/23]  
22  
23  
24  
25  
26  
27  
28  
29  
30  
31  
32  
33  
34  
35  
36  
37  
38  
39  
40  
41  
42  
43  
44  
45  
46  
47  
48  
49  
50  
51  
52  
53  
54  
55  
56  
57  
58  
59  
60

Table 1. Outcome assessments of the PAEPAD study

| Outcomes                                      | Instruments/Diagnostic criteria                                                   | Immediately post intervention | Upon discharge from OB ward | Upon disease flares | 3 months postnatal | 1 year postnatal | 2 year postnatal |
|-----------------------------------------------|-----------------------------------------------------------------------------------|-------------------------------|-----------------------------|---------------------|--------------------|------------------|------------------|
| Primary outcomes                              |                                                                                   |                               |                             |                     |                    |                  |                  |
| Cumulative incidence of AD at 2 years         | Hanifin&Rajak                                                                     |                               |                             |                     |                    |                  | ×                |
| Secondary outcomes                            |                                                                                   |                               |                             |                     |                    |                  |                  |
| AD outcomes                                   |                                                                                   |                               |                             |                     |                    |                  |                  |
| Time to first AD episode                      | Hanifin&Rajak                                                                     |                               |                             | ×                   |                    |                  |                  |
| Time to first topical corticosteroid exposure |                                                                                   |                               |                             | ×                   |                    |                  |                  |
| Disease related quality of life               | IDQOL                                                                             |                               |                             | ×                   |                    |                  |                  |
| Disease severity                              | SCORAD, EASI and IGA                                                              |                               |                             | ×                   |                    |                  |                  |
| Frequency of AD flares                        |                                                                                   |                               |                             |                     |                    |                  |                  |
| AD disease free days                          | IGA                                                                               |                               |                             |                     |                    |                  |                  |
| Cumulative clinical visit duration            | From the parents being seated within the consulting room to their exit thereafter |                               |                             | ×                   |                    |                  |                  |
| Atopic march outcomes                         |                                                                                   |                               |                             |                     |                    |                  |                  |
| Asthma incidence                              |                                                                                   |                               |                             |                     |                    |                  | ×                |
| Recurrent wheeze incidence                    |                                                                                   |                               |                             |                     |                    |                  | ×                |
| Rhinitis incidence                            |                                                                                   |                               |                             |                     |                    |                  | ×                |

|                                                                                               |                                                                                                                                                      |   |  |  |  |   |  |   |  |   |  |   |
|-----------------------------------------------------------------------------------------------|------------------------------------------------------------------------------------------------------------------------------------------------------|---|--|--|--|---|--|---|--|---|--|---|
| Food sensitization incidence                                                                  | Allergen specific IgE                                                                                                                                |   |  |  |  |   |  |   |  |   |  | × |
| Obstetric outcomes                                                                            |                                                                                                                                                      |   |  |  |  |   |  |   |  |   |  |   |
| Mode of birth                                                                                 | Eutocic/ dystocic/C-section                                                                                                                          |   |  |  |  |   |  |   |  |   |  | × |
|                                                                                               | Gestational diabetes, pre-eclampsia, placenta previa, placental abruption, prelabor rupture of membranes, puerperal infection, postpartum hemorrhage |   |  |  |  |   |  |   |  |   |  | × |
| Pathological pregnancy                                                                        |                                                                                                                                                      |   |  |  |  |   |  |   |  |   |  | × |
| Neonatal outcomes:                                                                            |                                                                                                                                                      |   |  |  |  |   |  |   |  |   |  |   |
| Newborn's weight                                                                              |                                                                                                                                                      |   |  |  |  |   |  |   |  |   |  | × |
| Admission in neonatal care unit (yes/no).                                                     |                                                                                                                                                      |   |  |  |  |   |  |   |  |   |  | × |
| Apgar score                                                                                   |                                                                                                                                                      |   |  |  |  |   |  |   |  |   |  | × |
| Fetal growth retardation                                                                      |                                                                                                                                                      |   |  |  |  |   |  |   |  |   |  | × |
| Any morbidity of the newborn that results in hospitalization in the first three month of life |                                                                                                                                                      |   |  |  |  |   |  |   |  |   |  | × |
| Emollient usage                                                                               | Total volume, brand, frequency                                                                                                                       |   |  |  |  |   |  |   |  |   |  | × |
|                                                                                               | Frequency, duration of bathing, bath temperature, cleanser usage, soap usage                                                                         |   |  |  |  |   |  |   |  |   |  | × |
| Bathing practice                                                                              |                                                                                                                                                      |   |  |  |  |   |  |   |  |   |  | × |
| Patient disease knowledge and attitude changes                                                | Questionnaire currently under validation                                                                                                             |   |  |  |  |   |  |   |  |   |  | × |
|                                                                                               |                                                                                                                                                      | × |  |  |  | × |  | × |  | × |  | × |

AD, atopic dermatitis; OB, obstetrics; IDQOL, Infantile Dermatitis Quality Of Life; SCORAD, SCORing of Atopic Dermatitis; EASI, Eczema Area and Severity Index; IGA, Investigator Global Assessment

576

577

Table 2. Biological sample collection at fixed follow-up visits

| Samples                         | GW12 | GW24-28 | GW36 | Delivery | 24-72h post-partum | 42 days post-partum | 3 months post-partum | 6 months post-partum | 12 months post-partum | 24 months post-partum |
|---------------------------------|------|---------|------|----------|--------------------|---------------------|----------------------|----------------------|-----------------------|-----------------------|
| Biological sample of the infant |      |         |      |          |                    |                     |                      |                      |                       |                       |
| Blood                           |      |         |      | ×        |                    |                     |                      |                      | ×                     | ×                     |
| Stool                           |      |         |      |          | ×                  | ×                   | ×                    | ×                    | ×                     | ×                     |
| Skin swab                       |      |         |      |          | ×                  | ×                   | ×                    |                      | ×                     | ×                     |
| Tongue dorsum swab              |      |         |      | ×        | ×                  | ×                   | ×                    | ×                    | ×                     | ×                     |
| Tape stripping                  |      |         |      | ×        | ×                  | ×                   | ×                    |                      | ×                     | ×                     |
| Biological sample of the mother |      |         |      |          |                    |                     |                      |                      |                       |                       |
| Blood                           |      | ×       | ×    | ×        | ×                  |                     |                      |                      |                       |                       |
| Stool                           | ×    | ×       | ×    |          |                    | ×                   | ×                    |                      |                       |                       |
| Urine                           | ×    | ×       | ×    |          | ×                  | ×                   | ×                    |                      | ×                     | ×                     |
| Skin swab                       |      | ×       | ×    |          | ×                  | ×                   | ×                    |                      |                       |                       |
| Breast milk                     |      |         |      |          | ×                  | ×                   | ×                    |                      |                       |                       |
| Placenta                        |      |         |      | ×        |                    |                     |                      |                      |                       |                       |
| Tongue dorsum swab              |      | ×       | ×    | ×        | ×                  | ×                   | ×                    |                      |                       |                       |
| Vaginal swab                    |      | ×       | ×    |          | ×                  |                     |                      |                      |                       |                       |



1  
2  
3  
4  
5  
6  
7  
8  
9  
10  
11  
12  
13  
14  
15  
16  
17  
18  
19  
20  
21  
22  
23  
24  
25  
26  
27  
28  
29  
30  
31  
32  
33  
34  
35  
36  
37  
38  
39  
40  
41  
42  
43  
44  
45  
46  
47

578 GW, gestational week

For peer review only

1  
2  
3  
4  
5  
6  
7  
8  
9  
10  
11  
12  
13  
14  
15  
16  
17  
18  
19  
20  
21  
22  
23  
24  
25  
26  
27  
28  
29  
30  
31  
32  
33  
34  
35  
36  
37  
38  
39  
40  
41  
42  
43  
44  
45  
46  
47  
48  
49  
50  
51  
52  
53  
54  
55  
56  
57  
58  
59  
60

579 Figure legend

580 Fig.1 Flow diagram of the PAEPAD (Preventive Antenatal Educational Program on Allergic

581 Diseases) study.

For peer review only

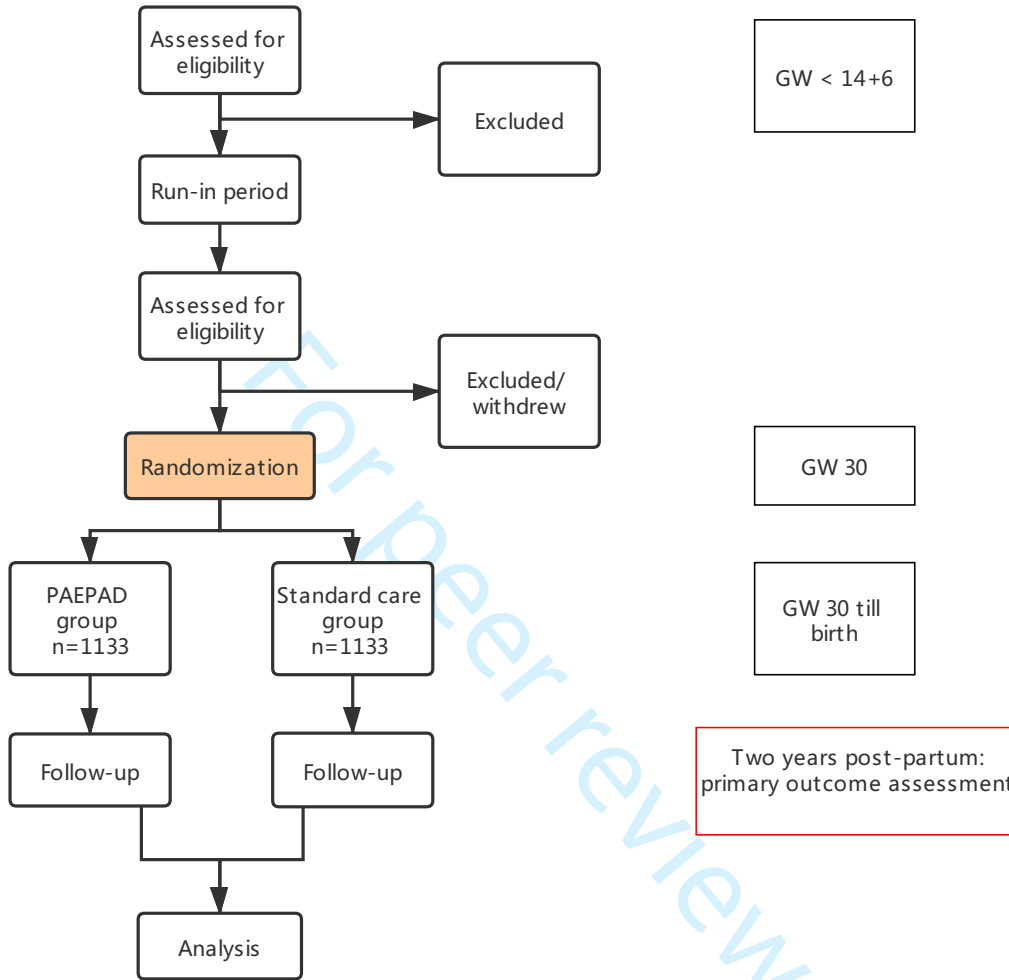

1  
2  
3  
4  
5  
6  
7  
8  
9  
10  
11  
12  
13  
14  
15  
16  
17  
18  
19  
20  
21  
22  
23  
24  
25  
26  
27  
28  
29  
30  
31  
32  
33  
34  
35  
36  
37  
38  
39  
40  
41  
42  
43  
44  
45  
46  
47  
48  
49  
50  
51  
52  
53  
54  
55  
56  
57  
58  
59  
60

**Table of Contents**

**BIOLOGICAL SAMPLE COLLECTION .....2**

**TABLE S1. RESPONSES OF A 12-ITEM KNOWLEDGE SURVEY .....7**

**TABLE S2. SPECIFIC RECOMMENDATIONS ON BABY SKIN CARE PRACTICES .....6**

For peer review only

## **BIOLOGICAL SAMPLE COLLECTION**

### **Blood samples**

Blood samples will be collected for analyses of DNA, protein, and exosomes and isolation of Peripheral Blood Mononuclear Cells (PBMCs). The mothers will be asked to be fasting for 8 h or more before the blood draw. Blood samples will be kept at room temperature for 30 min before centrifugation. For DNA analyses, a blood sample of 2ml will be collected at gestational week 24-28 into EDTA tubes and stored at -80°C until use. For protein analyses, the serum will be centrifuged at 1000g for 15 min at room temperature and the supernatants will be aliquoted and stored at - 80 °C until use. For PBMC isolation, PBMC will be purified as previously described, and stored in liquid nitrogen for use<sup>1</sup>. For exosome analyses, 5ml of blood will be collected into EDTA tubes and stored at 4°C for 4 h or overnight. Plasma will be separated by centrifugation at 5000×g for 5 minutes at 4°C. Cell-free, platelet poor plasma will be collected, aliquoted and stored at - 80 °C until use<sup>2</sup>.

At birth, the venous and arterial cord blood will be collected from the umbilical cord into EDTA tubes using a syringe. Blood components will be processed and stored as detailed above for analyses of DNA, protein and exosomes. An additional 3mL arterial cord blood will be drawn and stored at room temperature for flow cytometric analysis.

At the year of two, children will be asked to test for serum specific allergens including house dust mite, cat dander, birch pollen, grass pollen, milk, and egg. If the parent consent to having their children's blood drawn, 2ml blood will be collected into tubes containing clot activator and centrifuged at 1000g for 15 min. The supernatant will be aliquoted into 500ul aliquotes and stored at - 80 °C until use.

### **Urine samples**

The first catch midstream urine of mothers will be collected using a sterile cup, centrifuged and added to sterile tubes and stored at -80 °C until analyzed.

### **Placenta**

After delivery, the placenta will be sampled for analyses of histology, DNA, methylation, RNA and protein. First, a cross-section 2cm away from the cord insertion will be sampled and stored in formalin to be fixed for histological examination. Next, twenty pieces of villous tissue on the maternal aspect measuring 3\*3\*3mm will be taken at 2-4cm away from cord insertion and stored in five cryo-tubes, among which two will be prefilled with RNAlater. Villous samples will be snap-frozen in liquid nitrogen and then stored at -80°C. Third, villous tissue on the fetal aspect will be sampled and stored likewise.

### **Breast milk**

1  
2  
3 Breast milk will be collected with a breast pump at locations where postnatal follow-ups take  
4 place. At follow-up, 30ml of breast milk will be collected with sterilized RNase-free tubes,  
5 with the first 500ul disposed. For exosome analysis, 15 ml breast milk will be centrifuged at  
6 4°C for 10 minutes at 1500 g to remove cells and the cream layer. The supernatant will then  
7 be transferred to new tubes and centrifuged again at 12,000 g at 4°C to remove remaining  
8 cells and cream. The supernatant will then be immediately processed or frozen at -80 °C until  
9 use<sup>3</sup>. The remaining 15 ml breast milk sample will be aliquoted and stored at -80 °C directly  
10 until use.

### 17 **Feces**

18 The fecal samples will be self-collected by participants. For 16s RNA sequencing,  
19 participants will be provided with a sterile feces collection and preservation kit (ML-001A,  
20 Shenzhen Dayun Gene Technology Co., Shenzhen, China). For metabolomics analyses,  
21 participants will be provided with a sterile feces collection device with a spatula. Participants  
22 will be instructed to collect stool specimens of approximately 10ml within 2 h before each  
23 visit and bring them to the visits. Collected feces will then be snap-frozen in liquid nitrogen  
24 and stored at -80 °C until use<sup>4</sup>. Meconium of 2ml will be sampled and stored likewise.

### 31 **Vagina swab**

32 Vaginal swabs (4520CA, COPAN Flock Technologies, Brescia, Italy) will be collected from  
33 the posterior fornix by obstetricians. A speculum will be placed in the absence of lubrication.  
34 All specimens will be collected by swirling a sterile swab for 30 seconds, withdrawing the  
35 swab without contamination from other sites, and transferring the specimen into a sterile tube  
36 and stored at -80 °C until use.

### 41 **Skin swab**

42 Skin specimens will be collected from the cheek, anterior forearm, and lesional sites of the  
43 children. The forehead, anterior forearm, and cubital fossa of the mother will be sampled  
44 likewise. These sites will be swiped vigorously for 50 times over an area of 4 cm<sup>2</sup> using a  
45 sterile swab (4520CA, COPAN Flock Technologies, Brescia, Italy). The swab will be  
46 premoistened with DNA free saline. Swab specimens will be inserted into a sterile tube and  
47 stored at -80 °C until use.

### 53 **Tape stripping**

54 For each child, skin lipids will be collected by tape stripping from the same body sites as to  
55 where skin swabs are sampled from the children. The first layer will be discarded, and the  
56 second to fourth layers at the same place will be retained and placed separately in a glass tube  
57  
58  
59  
60

1  
2  
3 with 5 mL of methanol, then stored at -80 °C until use. The vernix will be sampled from the  
4 back of the newborn likewise.

5  
6 **Tongue dorsum swab**

7  
8 Subjects will be instructed not to eat, drink (except water), or brush their tongue during the  
9 12 h period before sampling and not to brush their teeth during the 2 h period before  
10 12 h period before sampling and not to brush their teeth during the 2 h period before  
11 sampling. Specimens will be collected from the central part of the tongue dorsum by swiping  
12 for 15 seconds using a sterile swab (4520CA, COPAN Flock Technologies, Brescia, Italy).  
13  
14  
15  
16  
17  
18  
19  
20  
21  
22  
23  
24  
25  
26  
27  
28  
29  
30  
31  
32  
33  
34  
35  
36  
37  
38  
39  
40  
41  
42  
43  
44  
45  
46  
47  
48  
49  
50  
51  
52  
53  
54  
55  
56  
57  
58  
59  
60

## References

1. Riedhammer C, Halbritter D, Weissert R. Peripheral Blood Mononuclear Cells: Isolation, Freezing, Thawing, and Culture. *Methods Mol Biol* 2016;1304:53-61. doi: 10.1007/7651\_2014\_99 [published Online First: 2014/08/06]
2. Stranska R, Gysbrechts L, Wouters J, et al. Comparison of membrane affinity-based method with size-exclusion chromatography for isolation of exosome-like vesicles from human plasma. *J Transl Med* 2018;16(1):1. doi: 10.1186/s12967-017-1374-6 [published Online First: 2018/01/11]
3. Zonneveld MI, Brisson AR, van Herwijnen MJ, et al. Recovery of extracellular vesicles from human breast milk is influenced by sample collection and vesicle isolation procedures. *J Extracell Vesicles* 2014;3 doi: 10.3402/jev.v3.24215 [published Online First: 2014/09/11]
4. Costea PI, Zeller G, Sunagawa S, et al. Towards standards for human fecal sample processing in metagenomic studies. *Nature biotechnology* 2017;35(11):1069-76. doi: 10.1038/nbt.3960



**Table S1. Specific Recommendations on Baby Skincare Practices****Part 1. Bathing and Moisturising**

- 1 The duration of a baby bath should not exceed 10 minutes.
- 2 Babies should be bathed no less than twice per week and more frequently during summer to reduce sweat irritation.
- 3 Liquid cleansers with a neutral or mildly acidic pH could be used. Soap-based cleansers should be avoided.
- 4 Scrubbing and exfoliation should be avoided.
- 5 Bath temperature should be set to 38-40 °C for newborns and <38 °C for infants.
- 6 Emollients should be used after bathing, preferably within 5 minutes.
- 7 Emollients could be used liberally at multiple times to alleviate xerosis.
- 8 Liquid cleansers and emollients should be fragrance and dye free.
- 9 Emollients are recommended to be used for the whole body
- 10 Lotions are recommended for use in hot summer months whereas creams are recommended for use in winter months.

**Part 2. Sun Protection**

- 1 Sun protection A-B-C: Avoid the sun between 10am and 4pm; Block harmful sun rays with a broad-spectrum sunscreen; Cover up with clothing and sunglasses
- 2 Sunscreen can be used for infants older than 6 months.

**Part 3. Commonly Used Topical Agents During Infancy**

- 1 Topical corticosteroids are the first line therapy for eczema.
- 2 Topical corticosteroids do not induce premature puberty.
- 3 Topical corticosteroids used properly will not cause weight gain.
- 4 Topical corticosteroids used properly will not cause osteoporosis nor hamper the physical development of a child.
- 5 Prolonged use of topical corticosteroids is associated with higher risk of skin infection, excessive hair growth and skin redness.
- 6 Topical antibiotics and astringents can be used in eczematous skin.
- 7 Topical corticosteroids used properly will not cause addiction nor resistance.

**Part 4. Atopic dermatitis and Atopic March: An Overview**

- 1 Atopic dermatitis is one of the most common skin condition during infancy.
- 2 Significant itch and extensive skin lesions may impose substantial disease burden on the affected child and family.
- 3 Barrier repair with emollients is the mainstay of treatment for atopic dermatitis.
- 4 Avoidance of triggers and control of inflammation and infection should be implemented following physician's instructions.
- 5 Topical corticosteroids are the first line therapy for control of inflammation in eczematous children.
- 6 Children with atopic dermatitis are at greater risk for developing other atopic disorders.

**Table S2. Responses of a 12-item Knowledge survey**

| Survey questions                                            | Score | Number answered<br>(n=395), n (%) |
|-------------------------------------------------------------|-------|-----------------------------------|
|                                                             | 1     | 17 (4.30)                         |
|                                                             | 2     | 61 (15.44)                        |
| 1. I should apply body wash every time I bathe my baby.     | 3     | 61 (15.44)                        |
|                                                             | 4     | 124 (31.39)                       |
|                                                             | 5     | 132 (33.42)                       |
|                                                             | 1     | 27(6.84)                          |
|                                                             | 2     | 86(21.77)                         |
| 2. Moisturizer should be applied all over my baby's body.   | 3     | 76(19.24)                         |
|                                                             | 4     | 128(32.41)                        |
|                                                             | 5     | 78(19.75)                         |
|                                                             | 1     | 55 (13.92)                        |
|                                                             | 2     | 109 (27.59)                       |
| 3. Moisturizer should be used no more than once a day.      | 3     | 121 (30.63)                       |
|                                                             | 4     | 91 (23.04)                        |
|                                                             | 5     | 19 (4.81)                         |
|                                                             | 1     | 25(6.33)                          |
|                                                             | 2     | 65(16.46)                         |
|                                                             | 3     | 79(20.00)                         |
| 4. I only use moisturizer after I bathe my baby.            | 4     | 170(43.04)                        |
|                                                             | 5     | 56(14.18)                         |
|                                                             | 1     | 32 (8.10)                         |
|                                                             | 2     | 96 (24.30)                        |
| 5. Massage oils can be used as a baby moisturizer.          | 3     | 112 (28.35)                       |
|                                                             | 4     | 112 (28.35)                       |
|                                                             | 5     | 43 (10.89)                        |
|                                                             | 1     | 10(2.53)                          |
|                                                             | 2     | 36(9.11)                          |
| 6. Moisturizer is not necessary for my baby at summer time. | 3     | 72(18.23)                         |
|                                                             | 4     | 160(40.51)                        |
|                                                             | 5     | 117(29.62)                        |
|                                                             | 1     | 39 (9.87)                         |
| 7. Sweat is an irritant to the baby's skin.                 | 2     | 54 (13.67)                        |
|                                                             | 3     | 95 (24.5)                         |

|                                                                                                                          |   |             |
|--------------------------------------------------------------------------------------------------------------------------|---|-------------|
|                                                                                                                          | 4 | 105 (26.58) |
|                                                                                                                          | 5 | 102 (25.82) |
|                                                                                                                          | 1 | 103(26.08)  |
|                                                                                                                          | 2 | 81(20.51)   |
| 8. I'm concerned to use topical corticosteroids ointment on my baby.                                                     | 3 | 149(37.72)  |
|                                                                                                                          | 4 | 37(9.37)    |
|                                                                                                                          | 5 | 25(6.33)    |
|                                                                                                                          | 1 | 43(10.89)   |
|                                                                                                                          | 2 | 53(13.42)   |
| 9. Topical corticosteroids will make the baby fat.                                                                       | 3 | 124(31.39)  |
|                                                                                                                          | 4 | 105(26.58)  |
|                                                                                                                          | 5 | 70(17.72)   |
|                                                                                                                          | 1 | 69(17.47)   |
|                                                                                                                          | 2 | 47(11.9)    |
| 10. Topical corticosteroids will induce premature puberty in babies.                                                     | 3 | 138(34.94)  |
|                                                                                                                          | 4 | 88(22.28)   |
|                                                                                                                          | 5 | 53(13.42)   |
|                                                                                                                          | 1 | 93(23.54)   |
|                                                                                                                          | 2 | 67(16.96)   |
| 11. If I had to use topical corticosteroids on my baby, I'd be concerned that my baby will become addicted to the drug.  | 3 | 140(35.44)  |
|                                                                                                                          | 4 | 59(14.94)   |
|                                                                                                                          | 5 | 36(9.11)    |
|                                                                                                                          | 1 | 88(22.28)   |
|                                                                                                                          | 2 | 89(22.53)   |
| 12. If I had to use topical corticosteroids on my baby, I'd be concerned that my baby will become resistant to the drug. | 3 | 135(34.18)  |
|                                                                                                                          | 4 | 57(14.43)   |
|                                                                                                                          | 5 | 26(6.58)    |

---

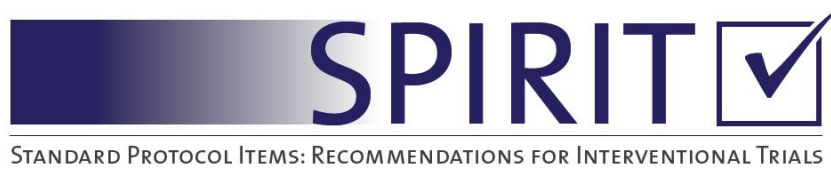

SPIRIT 2013 Checklist: Recommended items to address in a clinical trial protocol and related documents\*

| Section/item                      | ItemNo | Description                                                                                                                                                                                                                                                                              | Page No.              |
|-----------------------------------|--------|------------------------------------------------------------------------------------------------------------------------------------------------------------------------------------------------------------------------------------------------------------------------------------------|-----------------------|
| <b>Administrative information</b> |        |                                                                                                                                                                                                                                                                                          |                       |
| Title                             | 1      | Descriptive title identifying the study design, population, interventions, and, if applicable, trial acronym                                                                                                                                                                             | 1                     |
| Trial registration                | 2a     | Trial identifier and registry name. If not yet registered, name of intended registry                                                                                                                                                                                                     | 2, Line 51            |
|                                   | 2b     | All items from the World Health Organization Trial Registration Data Set                                                                                                                                                                                                                 | Refer to the appendix |
| Protocol version                  | 3      | Date and version identifier                                                                                                                                                                                                                                                              | 6, Line 159           |
| Funding                           | 4      | Sources and types of financial, material, and other support                                                                                                                                                                                                                              | 15, Line 464          |
| Roles and responsibilities        | 5a     | Names, affiliations, and roles of protocol contributors                                                                                                                                                                                                                                  | 14 Line 451           |
|                                   | 5b     | Name and contact information for the trial sponsor                                                                                                                                                                                                                                       | 1                     |
|                                   | 5c     | Role of study sponsor and funders, if any, in study design; collection, management, analysis, and interpretation of data; writing of the report; and the decision to submit the report for publication, including whether they will have ultimate authority over any of these activities | 14 Line 451           |
|                                   | 5d     | Composition, roles, and responsibilities of the coordinating centre, steering committee, endpoint adjudication committee, data management team, and other individuals or groups overseeing the trial, if applicable (see Item 21a for data monitoring committee)                         | 10 Line 305           |

**Introduction**

|    |                                                           |     |                                                       |                 |
|----|-----------------------------------------------------------|-----|-------------------------------------------------------|-----------------|
| 1  |                                                           |     |                                                       |                 |
| 2  | Background and                                            | 6a  | Description of research question and                  | 3 Line 72,      |
| 3  | rationale                                                 |     | justification for undertaking the trial, including    | supplementary   |
| 4  |                                                           |     | summary of relevant studies (published and            | table S2        |
| 5  |                                                           |     | unpublished) examining benefits and harms             |                 |
| 6  |                                                           |     | for each intervention                                 |                 |
| 7  |                                                           |     |                                                       |                 |
| 8  |                                                           | 6b  | Explanation for choice of comparators                 | 5 Line 134      |
| 9  |                                                           |     |                                                       |                 |
| 10 | Objectives                                                | 7   | Specific objectives or hypotheses                     | 5 Line 138      |
| 11 |                                                           |     |                                                       |                 |
| 12 | Trial design                                              | 8   | Description of trial design including type of trial   | 5 Line 148      |
| 13 |                                                           |     | (eg, parallel group, crossover, factorial, single     |                 |
| 14 |                                                           |     | group), allocation ratio, and framework (eg,          |                 |
| 15 |                                                           |     | superiority, equivalence, noninferiority,             |                 |
| 16 |                                                           |     | exploratory)                                          |                 |
| 17 |                                                           |     |                                                       |                 |
| 18 |                                                           |     |                                                       |                 |
| 19 |                                                           |     |                                                       |                 |
| 20 | <b>Methods: Participants, interventions, and outcomes</b> |     |                                                       |                 |
| 21 |                                                           |     |                                                       |                 |
| 22 | Study setting                                             | 9   | Description of study settings (eg, community          | 6 Line 155      |
| 23 |                                                           |     | clinic, academic hospital) and list of countries      |                 |
| 24 |                                                           |     | where data will be collected. Reference to            |                 |
| 25 |                                                           |     | where list of study sites can be obtained             |                 |
| 26 |                                                           |     |                                                       |                 |
| 27 | Eligibility criteria                                      | 10  | Inclusion and exclusion criteria for participants.    | 6 Line 185      |
| 28 |                                                           |     | If applicable, eligibility criteria for study centres |                 |
| 29 |                                                           |     | and individuals who will perform the                  |                 |
| 30 |                                                           |     | interventions (eg, surgeons, psychotherapists)        |                 |
| 31 |                                                           |     |                                                       |                 |
| 32 |                                                           |     |                                                       |                 |
| 33 | Interventions                                             | 11a | Interventions for each group with sufficient          | 8 Line 220      |
| 34 |                                                           |     | detail to allow replication, including how and        |                 |
| 35 |                                                           |     | when they will be administered                        |                 |
| 36 |                                                           |     |                                                       |                 |
| 37 |                                                           | 11b | Criteria for discontinuing or modifying               | Non             |
| 38 |                                                           |     | allocated interventions for a given trial             | pharmacological |
| 39 |                                                           |     | participant (eg, drug dose change in response         | intervention.   |
| 40 |                                                           |     | to harms, participant request, or                     | NA.             |
| 41 |                                                           |     | improving/worsening disease)                          |                 |
| 42 |                                                           |     |                                                       |                 |
| 43 |                                                           |     |                                                       |                 |
| 44 |                                                           | 11c | Strategies to improve adherence to                    | 8 Line 223-225, |
| 45 |                                                           |     | intervention protocols, and any procedures for        | line 246-248    |
| 46 |                                                           |     | monitoring adherence (eg, drug tablet return,         |                 |
| 47 |                                                           |     | laboratory tests)                                     |                 |
| 48 |                                                           |     |                                                       |                 |
| 49 |                                                           |     |                                                       |                 |
| 50 |                                                           | 11d | Relevant concomitant care and interventions           | 8 Line 244-245  |
| 51 |                                                           |     | that are permitted or prohibited during the trial     |                 |
| 52 |                                                           |     |                                                       |                 |
| 53 |                                                           |     |                                                       |                 |
| 54 |                                                           |     |                                                       |                 |
| 55 |                                                           |     |                                                       |                 |
| 56 |                                                           |     |                                                       |                 |
| 57 |                                                           |     |                                                       |                 |
| 58 |                                                           |     |                                                       |                 |
| 59 |                                                           |     |                                                       |                 |
| 60 |                                                           |     |                                                       |                 |

|    |                                                                     |     |                                                   |                  |
|----|---------------------------------------------------------------------|-----|---------------------------------------------------|------------------|
| 1  |                                                                     |     |                                                   |                  |
| 2  | Outcomes                                                            | 12  | Primary, secondary, and other outcomes,           | 9 Line 264       |
| 3  |                                                                     |     | including the specific measurement variable       |                  |
| 4  |                                                                     |     | (eg, systolic blood pressure), analysis metric    |                  |
| 5  |                                                                     |     | (eg, change from baseline, final value, time to   |                  |
| 6  |                                                                     |     | event), method of aggregation (eg, median,        |                  |
| 7  |                                                                     |     | proportion), and time point for each outcome.     |                  |
| 8  |                                                                     |     | Explanation of the clinical relevance of chosen   |                  |
| 9  |                                                                     |     | efficacy and harm outcomes is strongly            |                  |
| 10 |                                                                     |     | recommended                                       |                  |
| 11 |                                                                     |     |                                                   |                  |
| 12 |                                                                     |     |                                                   |                  |
| 13 | Participant                                                         | 13  | Time schedule of enrolment, interventions         | Fig.1            |
| 14 | timeline                                                            |     | (including any run-ins and washouts),             |                  |
| 15 |                                                                     |     | assessments, and visits for participants. A       |                  |
| 16 |                                                                     |     | schematic diagram is highly recommended           |                  |
| 17 |                                                                     |     | (see Figure)                                      |                  |
| 18 |                                                                     |     |                                                   |                  |
| 19 |                                                                     |     |                                                   |                  |
| 20 | Sample size                                                         | 14  | Estimated number of participants needed to        | 11 Line 330      |
| 21 |                                                                     |     | achieve study objectives and how it was           |                  |
| 22 |                                                                     |     | determined, including clinical and statistical    |                  |
| 23 |                                                                     |     | assumptions supporting any sample size            |                  |
| 24 |                                                                     |     | calculations                                      |                  |
| 25 |                                                                     |     |                                                   |                  |
| 26 |                                                                     |     |                                                   |                  |
| 27 | Recruitment                                                         | 15  | Strategies for achieving adequate participant     | 6 Line 162       |
| 28 |                                                                     |     | enrolment to reach target sample size             |                  |
| 29 |                                                                     |     |                                                   |                  |
| 30 |                                                                     |     |                                                   |                  |
| 31 | <b>Methods: Assignment of interventions (for controlled trials)</b> |     |                                                   |                  |
| 32 |                                                                     |     |                                                   |                  |
| 33 | Allocation:                                                         |     |                                                   |                  |
| 34 |                                                                     |     |                                                   |                  |
| 35 | Sequence                                                            | 16a | Method of generating the allocation sequence      | 7 Line 205       |
| 36 | generation                                                          |     | (eg, computer-generated random numbers),          |                  |
| 37 |                                                                     |     | and list of any factors for stratification. To    |                  |
| 38 |                                                                     |     | reduce predictability of a random sequence,       |                  |
| 39 |                                                                     |     | details of any planned restriction (eg, blocking) |                  |
| 40 |                                                                     |     | should be provided in a separate document         |                  |
| 41 |                                                                     |     | that is unavailable to those who enrol            |                  |
| 42 |                                                                     |     | participants or assign interventions              |                  |
| 43 |                                                                     |     |                                                   |                  |
| 44 |                                                                     |     |                                                   |                  |
| 45 | Allocation                                                          | 16b | Mechanism of implementing the allocation          | 7 Line 205       |
| 46 | concealment                                                         |     | sequence (eg, central telephone; sequentially     |                  |
| 47 | mechanism                                                           |     | numbered, opaque, sealed envelopes),              |                  |
| 48 |                                                                     |     | describing any steps to conceal the sequence      |                  |
| 49 |                                                                     |     | until interventions are assigned                  |                  |
| 50 |                                                                     |     |                                                   |                  |
| 51 |                                                                     |     |                                                   |                  |
| 52 | Implementation                                                      | 16c | Who will generate the allocation sequence,        | 7 Line 205, 6    |
| 53 |                                                                     |     | who will enrol participants, and who will assign  | line 166, 7 line |
| 54 |                                                                     |     | participants to interventions                     | 212              |
| 55 |                                                                     |     |                                                   |                  |
| 56 |                                                                     |     |                                                   |                  |
| 57 |                                                                     |     |                                                   |                  |
| 58 |                                                                     |     |                                                   |                  |
| 59 |                                                                     |     |                                                   |                  |
| 60 |                                                                     |     |                                                   |                  |

|    |           |     |                                                  |                 |
|----|-----------|-----|--------------------------------------------------|-----------------|
| 1  |           |     |                                                  |                 |
| 2  | Blinding  | 17a | Who will be blinded after assignment to          | 7 Line 214      |
| 3  | (masking) |     | interventions (eg, trial participants, care      |                 |
| 4  |           |     | providers, outcome assessors, data analysts),    |                 |
| 5  |           |     | and how                                          |                 |
| 6  |           |     |                                                  |                 |
| 7  |           | 17b | If blinded, circumstances under which            | Non             |
| 8  |           |     | unblinding is permissible, and procedure for     | pharmacological |
| 9  |           |     | revealing a participant's allocated intervention | intervention.   |
| 10 |           |     | during the trial                                 | NA.             |
| 11 |           |     |                                                  |                 |
| 12 |           |     |                                                  |                 |

### Methods: Data collection, management, and analysis

|    |                 |     |                                                    |             |
|----|-----------------|-----|----------------------------------------------------|-------------|
| 13 |                 |     |                                                    |             |
| 14 |                 |     |                                                    |             |
| 15 | Data collection | 18a | Plans for assessment and collection of             | 10 Line 306 |
| 16 | methods         |     | outcome, baseline, and other trial data,           |             |
| 17 |                 |     | including any related processes to promote         |             |
| 18 |                 |     | data quality (eg, duplicate measurements,          |             |
| 19 |                 |     | training of assessors) and a description of        |             |
| 20 |                 |     | study instruments (eg, questionnaires,             |             |
| 21 |                 |     | laboratory tests) along with their reliability and |             |
| 22 |                 |     | validity, if known. Reference to where data        |             |
| 23 |                 |     | collection forms can be found, if not in the       |             |
| 24 |                 |     | protocol                                           |             |
| 25 |                 |     |                                                    |             |
| 26 |                 |     |                                                    |             |
| 27 |                 |     |                                                    |             |
| 28 |                 | 18b | Plans to promote participant retention and         | 9 Line 288  |
| 29 |                 |     | complete follow-up, including list of any          |             |
| 30 |                 |     | outcome data to be collected for participants      |             |
| 31 |                 |     | who discontinue or deviate from intervention       |             |
| 32 |                 |     | protocols                                          |             |
| 33 |                 |     |                                                    |             |
| 34 |                 |     |                                                    |             |
| 35 | Data            | 19  | Plans for data entry, coding, security, and        | 9 Line 288  |
| 36 | management      |     | storage, including any related processes to        |             |
| 37 |                 |     | promote data quality (eg, double data entry;       |             |
| 38 |                 |     | range checks for data values). Reference to        |             |
| 39 |                 |     | where details of data management procedures        |             |
| 40 |                 |     | can be found, if not in the protocol               |             |
| 41 |                 |     |                                                    |             |
| 42 |                 |     |                                                    |             |
| 43 | Statistical     | 20a | Statistical methods for analysing primary and      | 11 Line 338 |
| 44 | methods         |     | secondary outcomes. Reference to where             |             |
| 45 |                 |     | other details of the statistical analysis plan can |             |
| 46 |                 |     | be found, if not in the protocol                   |             |
| 47 |                 |     |                                                    |             |
| 48 |                 |     |                                                    |             |
| 49 |                 | 20b | Methods for any additional analyses (eg,           | 11 Line 360 |
| 50 |                 |     | subgroup and adjusted analyses)                    |             |
| 51 |                 |     |                                                    |             |
| 52 |                 | 20c | Definition of analysis population relating to      | 11 Line 364 |
| 53 |                 |     | protocol non-adherence (eg, as randomised          |             |
| 54 |                 |     | analysis), and any statistical methods to          |             |
| 55 |                 |     | handle missing data (eg, multiple imputation)      |             |
| 56 |                 |     |                                                    |             |
| 57 |                 |     |                                                    |             |

### Methods: Monitoring

|    |                                 |     |                                                                                                                                                                                                                                                                                                                                       |                                       |
|----|---------------------------------|-----|---------------------------------------------------------------------------------------------------------------------------------------------------------------------------------------------------------------------------------------------------------------------------------------------------------------------------------------|---------------------------------------|
| 1  |                                 |     |                                                                                                                                                                                                                                                                                                                                       |                                       |
| 2  | Data monitoring                 | 21a | Composition of data monitoring committee (DMC); summary of its role and reporting structure; statement of whether it is independent from the sponsor and competing interests; and reference to where further details about its charter can be found, if not in the protocol. Alternatively, an explanation of why a DMC is not needed | 12 Line 370                           |
| 3  |                                 |     |                                                                                                                                                                                                                                                                                                                                       |                                       |
| 4  |                                 |     |                                                                                                                                                                                                                                                                                                                                       |                                       |
| 5  |                                 |     |                                                                                                                                                                                                                                                                                                                                       |                                       |
| 6  |                                 |     |                                                                                                                                                                                                                                                                                                                                       |                                       |
| 7  |                                 |     |                                                                                                                                                                                                                                                                                                                                       |                                       |
| 8  |                                 |     |                                                                                                                                                                                                                                                                                                                                       |                                       |
| 9  |                                 |     |                                                                                                                                                                                                                                                                                                                                       |                                       |
| 10 |                                 |     |                                                                                                                                                                                                                                                                                                                                       |                                       |
| 11 |                                 |     |                                                                                                                                                                                                                                                                                                                                       |                                       |
| 12 |                                 | 21b | Description of any interim analyses and stopping guidelines, including who will have access to these interim results and make the final decision to terminate the trial                                                                                                                                                               | 12 Line 372                           |
| 13 |                                 |     |                                                                                                                                                                                                                                                                                                                                       |                                       |
| 14 |                                 |     |                                                                                                                                                                                                                                                                                                                                       |                                       |
| 15 |                                 |     |                                                                                                                                                                                                                                                                                                                                       |                                       |
| 16 |                                 |     |                                                                                                                                                                                                                                                                                                                                       |                                       |
| 17 |                                 |     |                                                                                                                                                                                                                                                                                                                                       |                                       |
| 18 | Harms                           | 22  | Plans for collecting, assessing, reporting, and managing solicited and spontaneously reported adverse events and other unintended effects of trial interventions or trial conduct                                                                                                                                                     | Non pharmacological intervention. NA. |
| 19 |                                 |     |                                                                                                                                                                                                                                                                                                                                       |                                       |
| 20 |                                 |     |                                                                                                                                                                                                                                                                                                                                       |                                       |
| 21 |                                 |     |                                                                                                                                                                                                                                                                                                                                       |                                       |
| 22 |                                 |     |                                                                                                                                                                                                                                                                                                                                       |                                       |
| 23 |                                 |     |                                                                                                                                                                                                                                                                                                                                       |                                       |
| 24 | Auditing                        | 23  | Frequency and procedures for auditing trial conduct, if any, and whether the process will be independent from investigators and the sponsor                                                                                                                                                                                           | Not reported                          |
| 25 |                                 |     |                                                                                                                                                                                                                                                                                                                                       |                                       |
| 26 |                                 |     |                                                                                                                                                                                                                                                                                                                                       |                                       |
| 27 |                                 |     |                                                                                                                                                                                                                                                                                                                                       |                                       |
| 28 |                                 |     |                                                                                                                                                                                                                                                                                                                                       |                                       |
| 29 |                                 |     |                                                                                                                                                                                                                                                                                                                                       |                                       |
| 30 | <b>Ethics and dissemination</b> |     |                                                                                                                                                                                                                                                                                                                                       |                                       |
| 31 |                                 |     |                                                                                                                                                                                                                                                                                                                                       |                                       |
| 32 | Research ethics approval        | 24  | Plans for seeking research ethics committee/institutional review board (REC/IRB) approval                                                                                                                                                                                                                                             | 12 Line 380                           |
| 33 |                                 |     |                                                                                                                                                                                                                                                                                                                                       |                                       |
| 34 |                                 |     |                                                                                                                                                                                                                                                                                                                                       |                                       |
| 35 |                                 |     |                                                                                                                                                                                                                                                                                                                                       |                                       |
| 36 | Protocol amendments             | 25  | Plans for communicating important protocol modifications (eg, changes to eligibility criteria, outcomes, analyses) to relevant parties (eg, investigators, REC/IRBs, trial participants, trial registries, journals, regulators)                                                                                                      | NA                                    |
| 37 |                                 |     |                                                                                                                                                                                                                                                                                                                                       |                                       |
| 38 |                                 |     |                                                                                                                                                                                                                                                                                                                                       |                                       |
| 39 |                                 |     |                                                                                                                                                                                                                                                                                                                                       |                                       |
| 40 |                                 |     |                                                                                                                                                                                                                                                                                                                                       |                                       |
| 41 |                                 |     |                                                                                                                                                                                                                                                                                                                                       |                                       |
| 42 |                                 |     |                                                                                                                                                                                                                                                                                                                                       |                                       |
| 43 | Consent or assent               | 26a | Who will obtain informed consent or assent from potential trial participants or authorised surrogates, and how (see Item 32)                                                                                                                                                                                                          | 6 Line 169                            |
| 44 |                                 |     |                                                                                                                                                                                                                                                                                                                                       |                                       |
| 45 |                                 |     |                                                                                                                                                                                                                                                                                                                                       |                                       |
| 46 |                                 |     |                                                                                                                                                                                                                                                                                                                                       |                                       |
| 47 |                                 |     |                                                                                                                                                                                                                                                                                                                                       |                                       |
| 48 |                                 | 26b | Additional consent provisions for collection and use of participant data and biological specimens in ancillary studies, if applicable                                                                                                                                                                                                 | 6 Line 170                            |
| 49 |                                 |     |                                                                                                                                                                                                                                                                                                                                       |                                       |
| 50 |                                 |     |                                                                                                                                                                                                                                                                                                                                       |                                       |
| 51 |                                 |     |                                                                                                                                                                                                                                                                                                                                       |                                       |
| 52 | Confidentiality                 | 27  | How personal information about potential and enrolled participants will be collected, shared, and maintained in order to protect confidentiality before, during, and after the trial                                                                                                                                                  | 10 Line 321                           |
| 53 |                                 |     |                                                                                                                                                                                                                                                                                                                                       |                                       |
| 54 |                                 |     |                                                                                                                                                                                                                                                                                                                                       |                                       |
| 55 |                                 |     |                                                                                                                                                                                                                                                                                                                                       |                                       |
| 56 |                                 |     |                                                                                                                                                                                                                                                                                                                                       |                                       |
| 57 |                                 |     |                                                                                                                                                                                                                                                                                                                                       |                                       |
| 58 |                                 |     |                                                                                                                                                                                                                                                                                                                                       |                                       |
| 59 |                                 |     |                                                                                                                                                                                                                                                                                                                                       |                                       |
| 60 |                                 |     |                                                                                                                                                                                                                                                                                                                                       |                                       |



|    |                   |     |                                                   |                 |
|----|-------------------|-----|---------------------------------------------------|-----------------|
| 1  |                   |     |                                                   |                 |
| 2  | Declaration of    | 28  | Financial and other competing interests for       | 14 Line 470     |
| 3  | interests         |     | principal investigators for the overall trial and |                 |
| 4  |                   |     | each study site                                   |                 |
| 5  |                   |     |                                                   |                 |
| 6  | Access to data    | 29  | Statement of who will have access to the final    | 10 Line 322, 12 |
| 7  |                   |     | trial dataset, and disclosure of contractual      | Line 386        |
| 8  |                   |     | agreements that limit such access for             |                 |
| 9  |                   |     | investigators                                     |                 |
| 10 |                   |     |                                                   |                 |
| 11 | Ancillary and     | 30  | Provisions, if any, for ancillary and post-trial  | None            |
| 12 | post-trial care   |     | care, and for compensation to those who           |                 |
| 13 |                   |     | suffer harm from trial participation              |                 |
| 14 |                   |     |                                                   |                 |
| 15 |                   |     |                                                   |                 |
| 16 | Dissemination     | 31a | Plans for investigators and sponsor to            | 12 Line 388     |
| 17 | policy            |     | communicate trial results to participants,        |                 |
| 18 |                   |     | healthcare professionals, the public, and other   |                 |
| 19 |                   |     | relevant groups (eg, via publication, reporting   |                 |
| 20 |                   |     | in results databases, or other data sharing       |                 |
| 21 |                   |     | arrangements), including any publication          |                 |
| 22 |                   |     | restrictions                                      |                 |
| 23 |                   |     |                                                   |                 |
| 24 |                   |     |                                                   |                 |
| 25 |                   |     |                                                   |                 |
| 26 |                   | 31b | Authorship eligibility guidelines and any         | 14 Line 456     |
| 27 |                   |     | intended use of professional writers              |                 |
| 28 |                   |     |                                                   |                 |
| 29 |                   | 31c | Plans, if any, for granting public access to the  | Not reported    |
| 30 |                   |     | full protocol, participant-level dataset, and     |                 |
| 31 |                   |     | statistical code                                  |                 |
| 32 |                   |     |                                                   |                 |
| 33 |                   |     |                                                   |                 |
| 34 | <b>Appendices</b> |     |                                                   |                 |
| 35 |                   |     |                                                   |                 |
| 36 | Informed consent  | 32  | Model consent form and other related              | Consent form in |
| 37 | materials         |     | documentation given to participants and           | Chinese are     |
| 38 |                   |     | authorised surrogates                             | available upon  |
| 39 |                   |     |                                                   | request         |
| 40 |                   |     |                                                   |                 |
| 41 | Biological        | 33  | Plans for collection, laboratory evaluation, and  | 10 Line 325,    |
| 42 | specimens         |     | storage of biological specimens for genetic or    | supplementary   |
| 43 |                   |     | molecular analysis in the current trial and for   | material        |
| 44 |                   |     | future use in ancillary studies, if applicable    |                 |
| 45 |                   |     |                                                   |                 |
| 46 |                   |     |                                                   |                 |

\*It is strongly recommended that this checklist be read in conjunction with the SPIRIT 2013 Explanation & Elaboration for important clarification on the items. Amendments to the protocol should be tracked and dated. The SPIRIT checklist is copyrighted by the SPIRIT Group under the Creative Commons "[Attribution-NonCommercial-NoDerivs 3.0 Unported](https://creativecommons.org/licenses/by-nc-nd/3.0/)" license.

## Appendix. World Health Organization Trial Registration Data Set

| Data category                                 | Information                                                                                                                                                                                                                                                                                                                                                                                                                                                                                                  |
|-----------------------------------------------|--------------------------------------------------------------------------------------------------------------------------------------------------------------------------------------------------------------------------------------------------------------------------------------------------------------------------------------------------------------------------------------------------------------------------------------------------------------------------------------------------------------|
| Primary registry and trial identifying number | ChiCTR registry (Trial ID: ChiCTR2000040463)                                                                                                                                                                                                                                                                                                                                                                                                                                                                 |
| Date of registration in primary registry      | 28 November, 2020                                                                                                                                                                                                                                                                                                                                                                                                                                                                                            |
| Secondary identifying numbers                 | CFH2020-2-7121                                                                                                                                                                                                                                                                                                                                                                                                                                                                                               |
| Source(s) of monetary or material support     | Capital's Funds for Health Improvement and Research                                                                                                                                                                                                                                                                                                                                                                                                                                                          |
| Primary sponsor                               | Capital's Funds for Health Improvement and Research                                                                                                                                                                                                                                                                                                                                                                                                                                                          |
| Secondary sponsor(s)                          | NA                                                                                                                                                                                                                                                                                                                                                                                                                                                                                                           |
| Contact for public queries                    | Mutong Zhao, MD, MSc. [+86 18600116126r]<br>[muz880@mail.harvard.edu]<br>Lin Ma, MD, Department of Dermatology, Beijing Children's Hospital, Capital Medical University, National Center for Children's Health, Beijing, China. E-mail: bch_maleen@aliyun.com. Tel: +86 13601305676<br>Xiuhua Ma, MD, Department of Obstetrics and Gynecology, Beijing Daxing District People's Hospital, Capital Medical University Daxing Teaching Hospital, Beijing, China. E-mail: mxhdxqyy@126.com Tel: +86 13381021859 |
| Contact for scientific queries                | Preventive Antenatal Educational Program on Allergic Diseases (PAEPAD) for prevention of atopic dermatitis                                                                                                                                                                                                                                                                                                                                                                                                   |
| Public title                                  | Preventive Antenatal Educational Program on Allergic Diseases (PAEPAD) versus standard antenatal care for prevention of atopic dermatitis: study protocol for a single-center, investigator blinded randomized controlled trial.                                                                                                                                                                                                                                                                             |
| Scientific title                              |                                                                                                                                                                                                                                                                                                                                                                                                                                                                                                              |
| Countries of recruitment                      | China                                                                                                                                                                                                                                                                                                                                                                                                                                                                                                        |
| Health condition(s) or problem(s) studied     | Atopic dermatitis<br>PAEPAD group: multi-disciplinary education of neonatal care                                                                                                                                                                                                                                                                                                                                                                                                                             |
| Intervention(s)                               | Standard care group: standard education of neonatal care<br>Ages eligible for study: $\geq 18$ years<br>Sexes eligible for study: expecting mothers<br>Accepts healthy volunteers: no<br>Inclusion criteria: 1. Enlisted in the birth registry of Daxing Teaching Hospital of Capital Medical University and intend to give birth at this location; 2. Women aged $\geq 18$ ; 3. Less than 14+6 gestational week when recruited as measured by last menstrual period; 4. Residents of                        |
| Key inclusion and exclusion criteria          |                                                                                                                                                                                                                                                                                                                                                                                                                                                                                                              |

Daxing and intend to remain residing in Daxing for at least two years postpartum; 5. Written consent form.

Exclusion criteria: 1. Planned abortion; 2. Rare comorbidities of the mother that may cause miscarriage and congenital disabilities as determined by obstetricians, including but not limited to malignancies, congenital heart diseases, monogenetic diseases; 3. Recurrent miscarriage.

Interventional

Allocation: randomized

Intervention model: parallel assignment

Masking: investigator blind

Study type Primary purpose: prevention

Date of first enrolment 30 November, 2020

Target sample size 2266

Recruitment status Recruiting

Primary outcome(s) Cumulative incidence of atopic dermatitis at 2 years

Atopic dermatitis outcomes, atopic march outcomes, obstetric outcomes, neonatal outcomes, parental knowledge outcomes as detailed in the manuscripts

Ethics review Approved on 23 November, 2020 by the ethical committee of Capital Medical University Daxing Teaching Hospital, Beijing, China.

Completion date Last subject, last visit

Summary results NA

IPD sharing statement IPD will be shared with upon request (requests should be directed to muz880@mail.harvard.edu) for individual data meta-analyses (time frame: 1 year after publication. No end date.).
